# Supplementary material for: Oxidative cross-coupling of quinoxalinones with indoles enabled by acidochromism
Source: Royal Society of Chemistry journal article supplement (doi:10.1039/d3ob00280b), 2023-01-01

## *Supporting Information*

### **Acidochromism-Enabled Aerobic Oxidative Cross-coupling of Quinoxalinones with Indoles and Fluorescence of Products**

Jie Huang, Wenkai Yuan, Long Wang and Xiang-Ying Tang\*

Key Laboratory of Material Chemistry for Energy Conversion and Storage, Ministry of Education, Hubei Engineering Research Center for Biomaterials and Medical Protective Materials, Hubei Key Laboratory of Bioinorganic Chemistry & Materia Medica, Semiconductor chemistry center, School of Chemistry and Chemical Engineering, School of Chemistry and Chemical Engineering, Huazhong University of Science and Technology (HUST), Wuhan 430074, People's Republic of China

#### **Table of Contents**

|                                                                                                                |     |
|----------------------------------------------------------------------------------------------------------------|-----|
| 1. General experimental information .....                                                                      | S1  |
| 2. Preparation of starting materials .....                                                                     | S2  |
| 2.1 General procedure for the synthesis of quinoxalin-2-ones <sup>1</sup> .....                                | S2  |
| 2.2 General procedure for the synthesis of methylquinoxalin-2(1H)-one with Indoles .....                       | S2  |
| 3. Optimization of reaction conditions.....                                                                    | S2  |
| 4. Control experiments.....                                                                                    | S3  |
| 4.1 To get the intermediate 3ab' in the nitrogen atmosphere .....                                              | S3  |
| 4.2 NMR verification of intermediate 3yb' .....                                                                | S4  |
| 4.3 Emission quenching experiments under nitrogen and oxygen atomsphere .....                                  | S8  |
| 4.4 UV/visible absorption spectra of 3ab' .....                                                                | S9  |
| 4.5 Cyclic voltammogram experiment and the estimation of excited state reduction potential of 3ab and PC ..... | S9  |
| 5. Determination of singlet oxygen species <sup>3</sup> .....                                                  | S11 |
| 6. Light on/off experiments.....                                                                               | S11 |
| 7. Reaction profiles .....                                                                                     | S12 |
| 8. UV–Vis absorption spectra.....                                                                              | S13 |
| 9. Fluorescence spectra .....                                                                                  | S16 |
| 10. Spectroscopic properties of fluorophores 3 <sup>6</sup> .....                                              | S17 |
| 11. References.....                                                                                            | S18 |
| 12. Characterization data for the products .....                                                               | S18 |

## 1. General experimental information

$^1\text{H}$  NMR and  $^{13}\text{C}$  NMR spectra were recorded on an Agilent DD2 400-MR spectrometer in  $\text{CDCl}_3$  or  $\text{DMSO}-d_6$  with tetramethylsilane (TMS) as the internal standard; Chemical shifts ( $\delta$ ) are expressed in ppm and  $J$ -values are in Hz. UV-Vis absorption spectra were recorded by using Shimadzu UV-2600 UV/Vis spectrometer. Fluorescence Spectra were recorder by using RF-5301PC for all experiments. HRMS was measured on a TOF-Q mass spectrometer equipped with an ESI source. Melting point was measured with SGWX-4 Microscopic Melting Point Tester. The solvents and chemicals were purchased and used as received. All reactions were monitored by TLC with Huanghai GF254 silica gel coated plates. Flash column chromatography was carried out using 300-400 mesh silica gel at increased pressure.

## 2. Preparation of starting materials

### 2.1 General procedure for the synthesis of quinoxalin-2-ones<sup>1</sup>

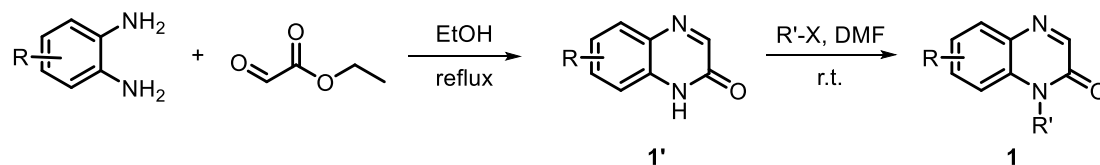

To ethanol (1 mol/L) were added *o*-arylenediamine (1 equiv.) and ethyl 2-oxoacetate (1.1 equiv.). The reaction mixture was stirred at reflux for 1h, then at room temperature overnight. The precipitate was filtered and washed with ethanol, then dried to give quinoxalinone **1'**. To a suspension of quinoxalinone **1'** (1 equiv.) in DMF was added potassium carbonate (1.2 equiv.) and the corresponding halides (R'-X) (1.6 equiv.). The mixture was stirred at room temperature overnight. Ethyl acetate and water were added. The aqueous layer was extracted twice with EtOAc. The combined organic layers were washed with a saturated solution of NH<sub>4</sub>Cl then brine, dried over MgSO<sub>4</sub>, filtered and evaporated under reduced pressure. The residue is purified by flash chromatography over silica gel to afford the desired product **1**.

### 2.2 General procedure for the synthesis of methylquinoxalin-2(1H)-one with Indoles

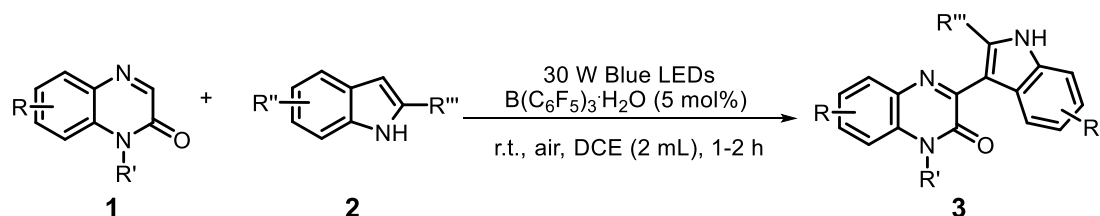

To a mixture of **1** (0.2 mmol) and **2** (0.3 mmol) in DCE (2.0 mL) was added B(C<sub>6</sub>F<sub>5</sub>)<sub>3</sub>·H<sub>2</sub>O (5 mol%, 5.1 mg) at room temperature, the reaction mixture was irradiated by a 30 W blue LEDs lamp (approximately 1 cm away from the reaction vessel). After completion (checked by TLC), the mixture was concentrated under reduced pressure and the crude product was purified by silica gel column chromatography using petroleum ether and ethyl acetate (PE: EA= 2:1) as eluent to afford the corresponding products **3**.

## 3. Optimization of reaction conditions

Table S1 Optimization of experimental conditions <sup>a</sup>

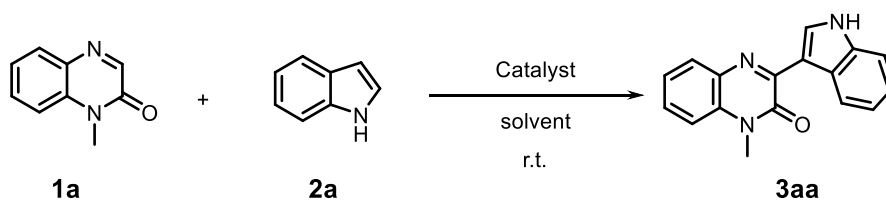

| Entry           | Catalyst (5 mol %)                                                        | Indole (equiv.) | Solvent            | Yield (%) <sup>b</sup> |
|-----------------|---------------------------------------------------------------------------|-----------------|--------------------|------------------------|
| 1               | B(C <sub>6</sub> F <sub>5</sub> ) <sub>3</sub> ·H <sub>2</sub> O + EosinY | 1.5             | THF                | 50                     |
| 2               | B(C <sub>6</sub> F <sub>5</sub> ) <sub>3</sub> ·H <sub>2</sub> O          | 1.5             | THF                | 55                     |
| 3               | ---                                                                       | 1.5             | THF                | Trace                  |
| 4               | B(C <sub>6</sub> F <sub>5</sub> ) <sub>3</sub> ·H <sub>2</sub> O          | 1.5             | DCM                | 90                     |
| <b>5</b>        | <b>B(C<sub>6</sub>F<sub>5</sub>)<sub>3</sub>·H<sub>2</sub>O</b>           | <b>1.5</b>      | <b>DCE</b>         | <b>94</b>              |
| 6               | B(C <sub>6</sub> F <sub>5</sub> ) <sub>3</sub> ·H <sub>2</sub> O          | 1.5             | CH <sub>3</sub> CN | 72                     |
| 7               | B(C <sub>6</sub> F <sub>5</sub> ) <sub>3</sub> ·H <sub>2</sub> O          | 1.5             | Toluene            | 91                     |
| 8               | B(C <sub>6</sub> F <sub>5</sub> ) <sub>3</sub> ·H <sub>2</sub> O          | 1.5             | EA                 | 55                     |
| 9               | B(C <sub>6</sub> F <sub>5</sub> ) <sub>3</sub> ·H <sub>2</sub> O          | 1.0             | DCE                | 62                     |
| 10              | B(C <sub>6</sub> F <sub>5</sub> ) <sub>3</sub> ·H <sub>2</sub> O          | 1.2             | DCE                | 87                     |
| 11              | TsOH                                                                      | 1.5             | DCE                | 67                     |
| 12              | HCl                                                                       | 1.5             | DCE                | 72                     |
| 13              | Yb(OTf) <sub>3</sub>                                                      | 1.5             | DCE                | 82                     |
| 14              | Sc(OTf) <sub>3</sub>                                                      | 1.5             | DCE                | 78                     |
| 15 <sup>c</sup> | B(C <sub>6</sub> F <sub>5</sub> ) <sub>3</sub> ·H <sub>2</sub> O          | 1.5             | DCE                | 89                     |
| 16 <sup>d</sup> | B(C <sub>6</sub> F <sub>5</sub> ) <sub>3</sub> ·H <sub>2</sub> O          | 1.5             | DCE                | Trace                  |
| 17 <sup>e</sup> | B(C <sub>6</sub> F <sub>5</sub> ) <sub>3</sub> ·H <sub>2</sub> O          | 1.5             | DCE                | Trace                  |

<sup>a</sup>Reaction conditions: 0.2 mmol scale, catalyst (5.0 mol%), solvent (2.0 mL), r.t., air, Blue LEDs (455-460 nm, 30W) for 1 h. <sup>b</sup>Isolated yield. <sup>c</sup>Oxygen atmosphere. <sup>d</sup>Nitrogen atmosphere. <sup>e</sup>In darkness.

## 4. Control experiments

### 4.1 To get the intermediate 3ab' in the nitrogen atmosphere

To a mixture of **1a** (0.2 mmol) and **2b** (0.3 mmol) in DCE (2.0 mL) was added B(C<sub>6</sub>F<sub>5</sub>)<sub>3</sub>·H<sub>2</sub>O (5 mol%, 5.1 mg) at room temperature in the nitrogen atmosphere. The reaction mixture was irradiated by a 30 W blue LEDs lamp (approximately 1 cm away from the reaction vessel). After completion (checked by TLC), the mixture was concentrated under reduced pressure and the crude product was purified by silica gel column chromatography petroleum ether and ethyl acetate (PE: EA= 2:1) as eluent to afford the corresponding product **3ab'**.

The following reaction was carried out in general procedure: To a mixture of **3ab'** (0.2 mmol) in solvent (2.0 mL) was added catalyst (5 mol%) at room temperature. The

reaction mixture was irradiated by a 30 W blue LEDs lamp (approximately 1 cm away from the reaction vessel). After completion, the yields of **3ab** were determined by GC.

#### Scheme S1 Control experiments

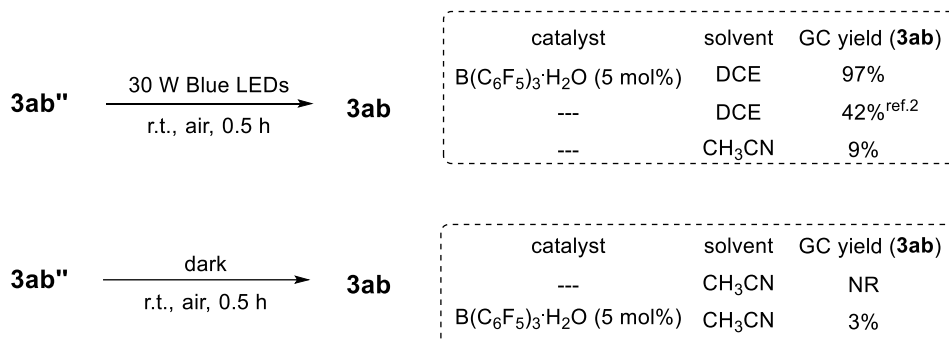

#### 4.2 NMR verification of intermediate **3yb'**

To a mixture of **3y** (0.2 mmol) and **2b** (0.3 mmol) in DCE (2.0 mL) was added  $\text{B}(\text{C}_6\text{F}_5)_3 \cdot \text{H}_2\text{O}$  (5 mol%, 5.1 mg) at room temperature in the nitrogen atmosphere. The reaction mixture was irradiated by a 30 W blue LEDs lamp (approximately 1 cm away from the reaction vessel). After completion, the mixture was concentrated under reduced pressure and the crude product was purified by column chromatography (neutral  $\text{Al}_2\text{O}_3$ ) using petroleum ether and ethyl acetate (PE: EA= 2:1) as eluent to afford the corresponding product **3yb'**.

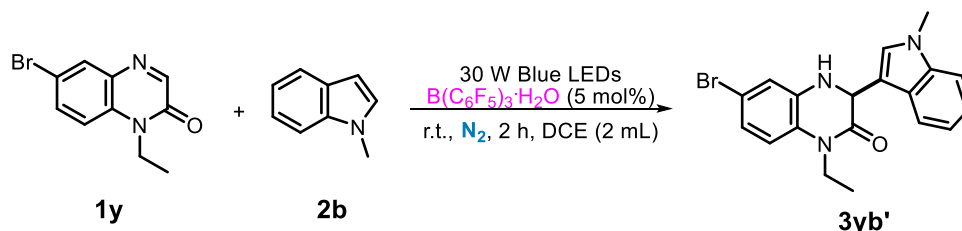

The following reaction was carried out in general procedure: To a mixture of **3yb'** (0.1 mmol) in  $\text{CDCl}_3$  (0.7 mL) at room temperature was added  $\text{B}(\text{C}_6\text{F}_5)_3 \cdot \text{H}_2\text{O}$  (20 mol%, 10.2 mg). There are two compounds **3yb'** and **3yb**. And it was finally added  $\text{B}(\text{C}_6\text{F}_5)_3 \cdot \text{H}_2\text{O}$  (20 mol%, 10.2 mg) to test  $^1\text{HNMR}$ . There are also two compounds **3yb'** and **3yb**.

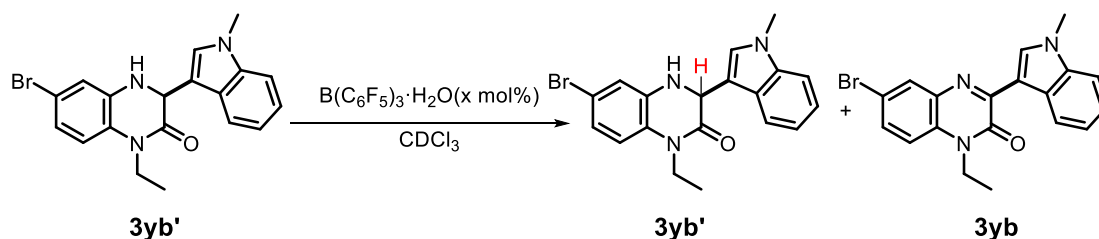

The C'-H chemical shift of intermediate **3yb'** is 5.293 ppm, then 5.265 ppm and 5.227 ppm with the addition of 0.2 equiv.  $B(C_6F_5)_3 \cdot H_2O$  and another 0.2 equiv.

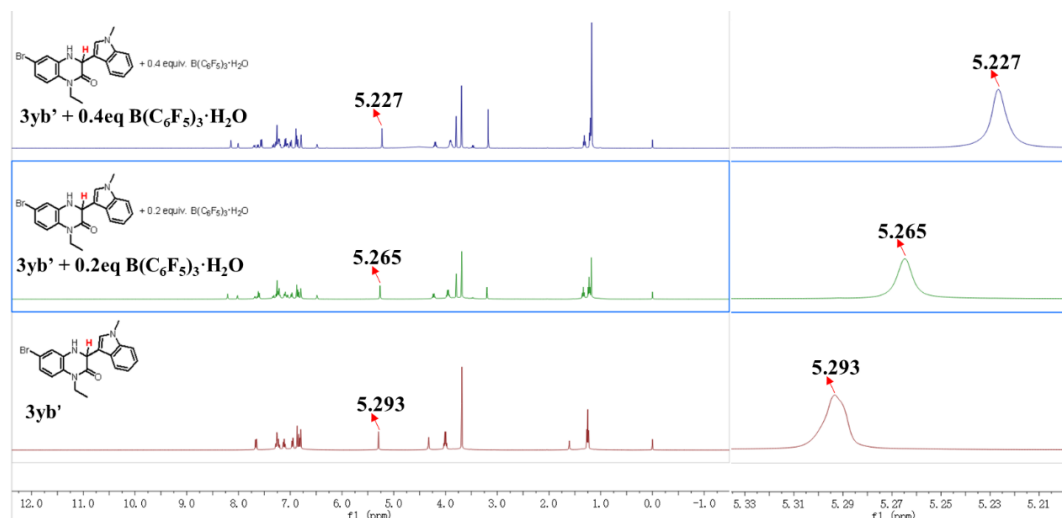

$B(C_6F_5)_3 \cdot H_2O$ , indicating that the C-H is more electron rich to be oxidized in the presence of  $B(C_6F_5)_3 \cdot H_2O$ .

**Figure S1**  $^1H$ NMR spectra of **3yb'**, **3yb**+ $B(C_6F_5)_3 \cdot H_2O$  in  $CDCl_3$

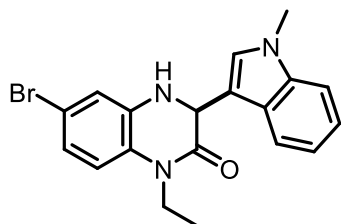

**6-bromo-1-ethyl-3-(1-methyl-1H-indol-3-yl)-**

**3,4-dihydroquinoxalin-2(1H)-one (3yb')**. White solid, 42.5 mg, yield 22%. m.p.: 173.4-174.1 °C.  $^1H$  NMR (400 MHz,  $CDCl_3$ , TMS)  $\delta$  7.66 (d,  $J = 8.0$  Hz, 1H), 7.30 – 7.19 (m, 2H), 7.15 – 7.09 (m, 1H), 6.99 – 6.93 (m, 1H), 6.87 (s, 1H), 6.83 (d,  $J = 8.6$  Hz, 1H), 6.81 – 6.78 (m, 1H), 5.29 (br, 1H), 4.33 (s, 1H), 4.00 (q,  $J = 7.1$  Hz, 2H), 3.68 (s, 3H), 1.25 (t,  $J = 7.1$  Hz, 3H).  $^{13}C$  NMR (101 MHz,  $CDCl_3$ , TMS)  $\delta$  165.1, 137.1, 136.5, 127.0, 126.6, 126.2, 122.2, 122.0, 119.8, 119.5, 117.1, 115.9, 115.8, 112.2, 109.5, 53.9, 37.2, 32.9, 12.5. HRMS (ESI,  $m/z$ ) calcd for  $C_{19}H_{19}BrN_3O^+$   $[M+H]^+$ : 384.0706, found 384.0709.

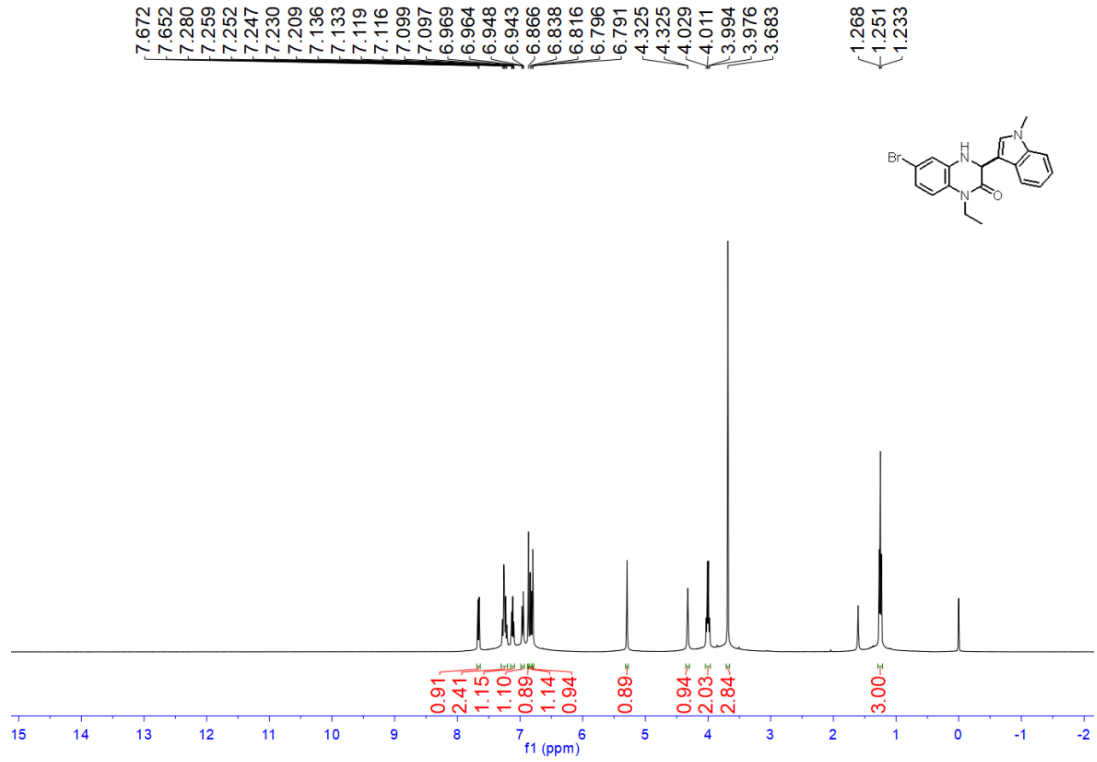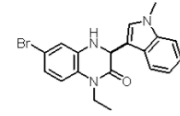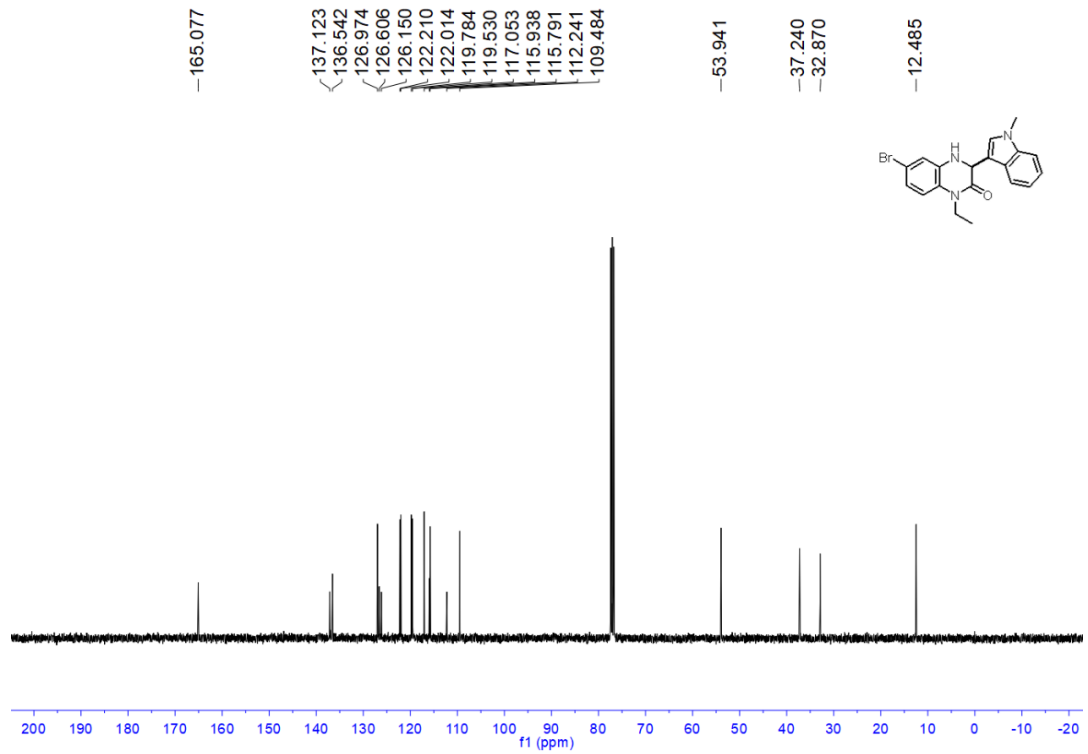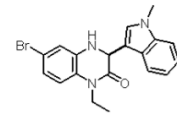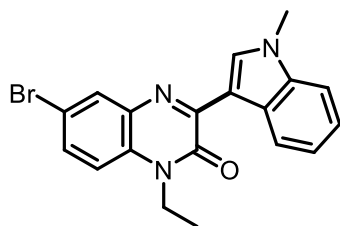

**6-bromo-1-ethyl-3-(1-methyl-1H-indol-3-**

**yl)quinoxalin-2(1H)-one (3yb).** Yellow solid, 69.0 mg, yield 90%. m.p.: 208.5-208.9 °C. <sup>1</sup>H NMR (400 MHz, CDCl<sub>3</sub>, TMS) δ 8.94 – 8.88 (m, 1H), 8.79 (s, 1H), 8.06 (d, *J* = 2.1 Hz, 1H), 7.47 – 7.41 (m, 1H), 7.36 – 7.29 (m, 3H), 7.06 (d, *J* = 8.9 Hz, 1H), 4.27 (q, *J* = 7.1 Hz, 2H), 3.82 (s, 3H), 1.36 (t, *J* = 7.2 Hz, 3H). <sup>13</sup>C NMR (101 MHz, CDCl<sub>3</sub>, TMS) δ 153.7, 151.6, 137.2, 137.1, 135.2, 131.6, 130.4, 129.5, 127.4, 123.7, 123.0, 121.8, 115.8, 114.6, 111.2, 109.4, 37.5, 33.4, 12.5. HRMS (ESI, *m/z*) calcd for C<sub>19</sub>H<sub>17</sub>BrN<sub>3</sub>O<sup>+</sup> [M+H]<sup>+</sup>: 382.0550, found 382.0555.

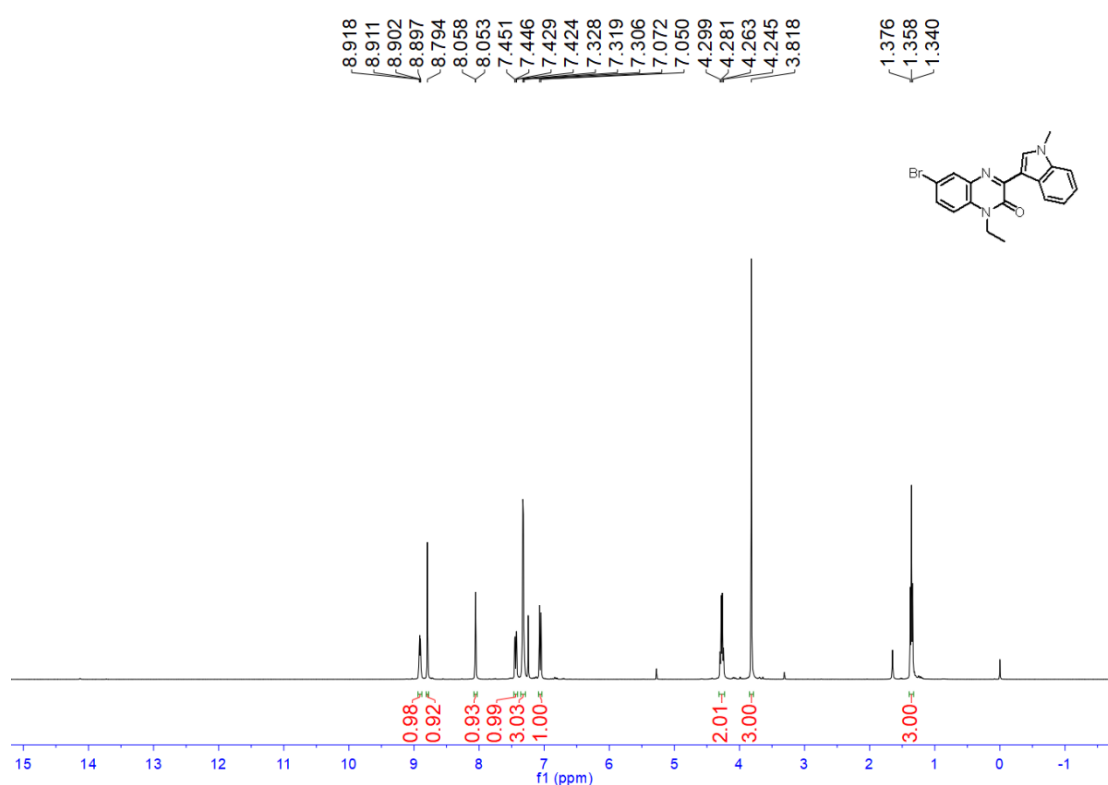



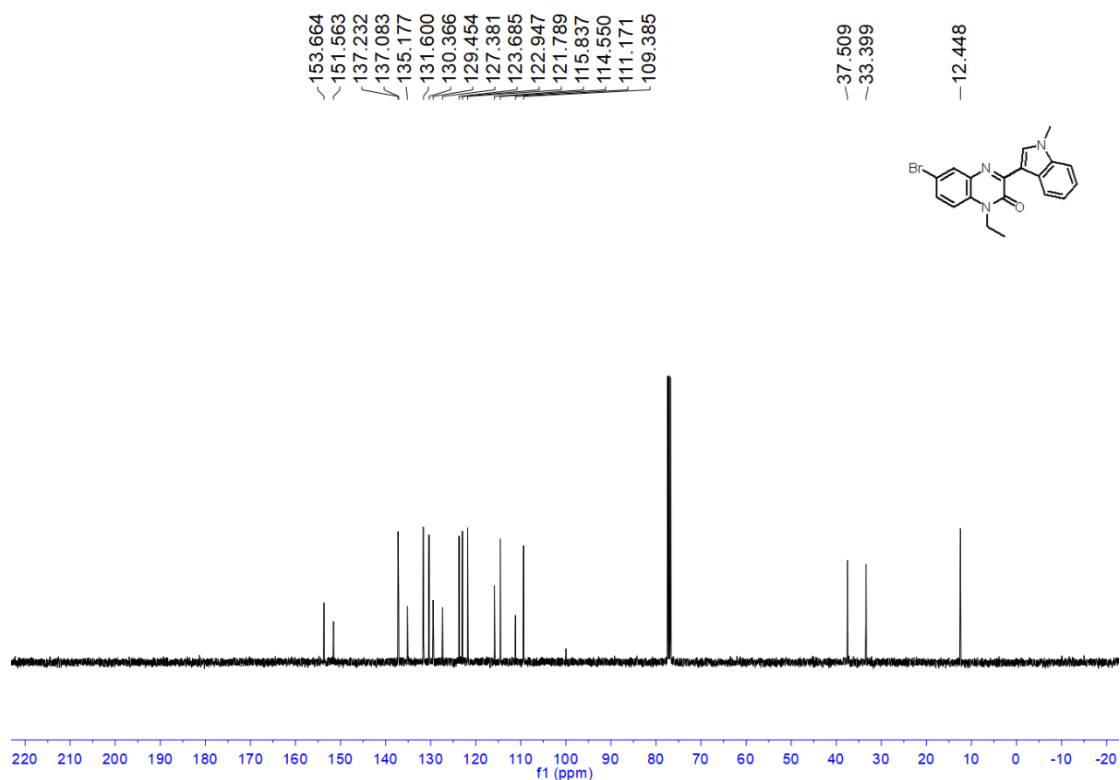

#### 4.3 Emission quenching experiments under nitrogen and oxygen atmosphere

Emission intensities were recorded using a SHIMADZU RF-5301PC luminescence spectrophotometer. **PC** solutions were excited at 390 nm and the emission intensity was collected at 460 nm. In a typical experiment, to a  $2 \times 10^{-6}$  M solution of **PC** in DCE under nitrogen (black line) and oxygen atmosphere of a quencher (red line) in a quartz cuvette. The relative luminescence intensity was quenched by oxygen.

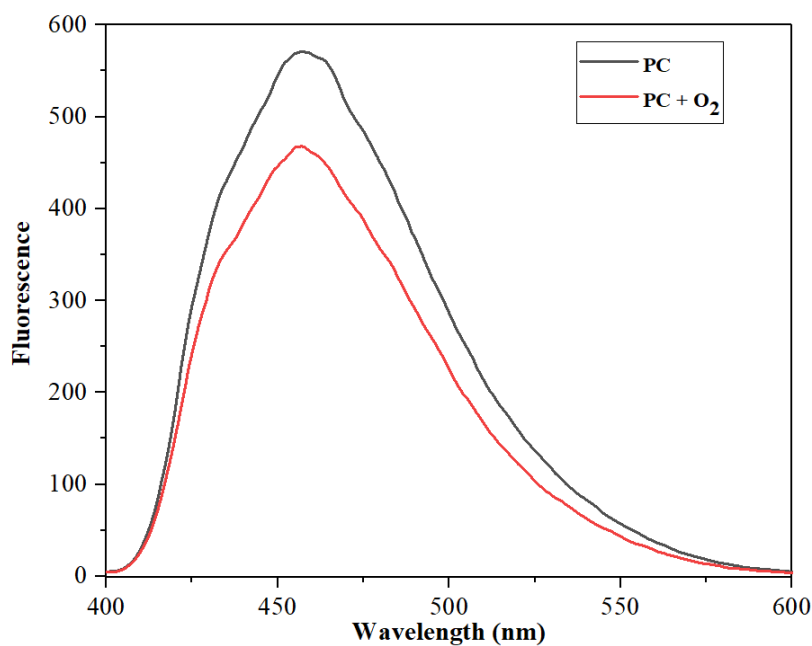

**Figure S2** Fluorescence quenching under nitrogen and oxygen atmosphere.  
**4.4 UV/visible absorption spectra of 3ab'**

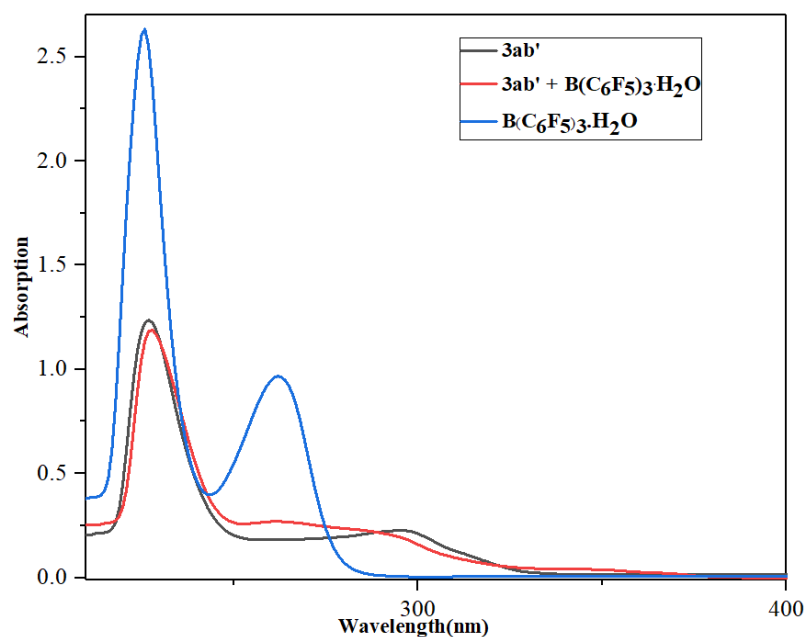

**Figure S3** UV/visible absorption spectra of **3ab'**, **B(C<sub>6</sub>F<sub>5</sub>)<sub>3</sub>·H<sub>2</sub>O** and **3ab' + B(C<sub>6</sub>F<sub>5</sub>)<sub>3</sub>·H<sub>2</sub>O** in DCE at the concentration  $2 \times 10^{-5}$  M.

**4.5 Cyclic voltammogram experiment and the estimation of excited state reduction potential of 3ab and PC**

Cyclic voltammogram was recorded using a Gamry Interface 5000E potentiostat. Cyclic voltammogram measurement was performed with a glassy carbon working electrode, an Ag/AgCl, KCl (saturated) reference electrode and a Pt sheet auxiliary electrode at room temperature in nitrogen degassed MeCN solution (10 mL) of

tetrabutylammonium hexafluorophosphate (0.1 M), containing **3ab** (0.025 M), scan rate = 50 mV·s<sup>-1</sup>.

Cyclic voltammogram was recorded using a Gamry Interface 5000E potentiostat. Cyclic voltammogram measurement was performed with a glassy carbon working electrode, an Ag/AgCl, KCl (saturated) reference electrode and a Pt sheet auxiliary electrode at room temperature in nitrogen degassed MeCN solution (10 mL) of tetrabutylammonium hexafluorophosphate (0.1 M), containing **PC** (**3ab** + **B(C<sub>6</sub>F<sub>5</sub>)<sub>3</sub>·H<sub>2</sub>O**) (0.025 M), scan rate = 50 mV·s<sup>-1</sup>.

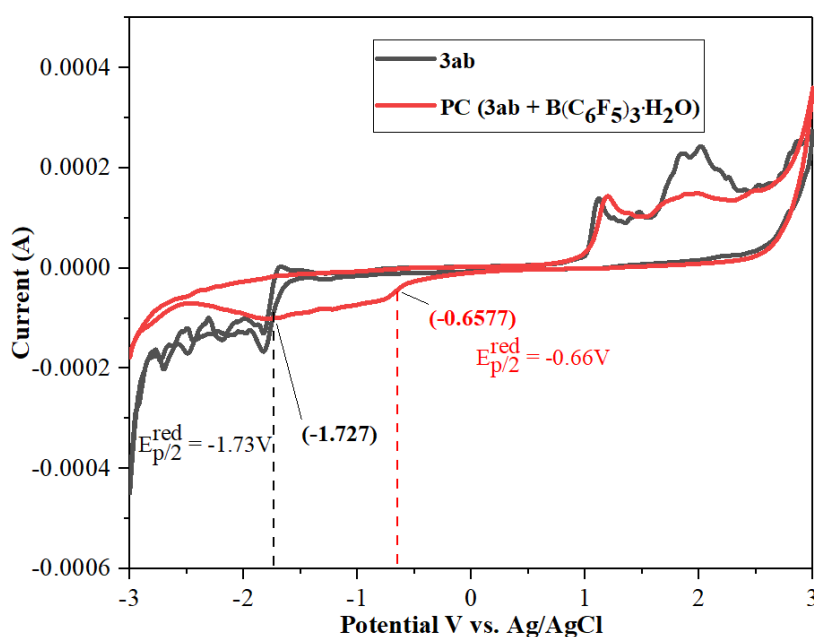

**Figure S4:** Cyclic voltammetry of **3ab** (black line) and **PC** (red line).

**3ab** (black line):  $E_{1/2}^{\text{red}} = -1.73 \text{ V vs Ag/AgCl, KCl (sat'd)}$

$$E_{0,0}^{\text{S}1} = (3.24 \text{ eV (383 nm)} + 2.70 \text{ eV (449 nm)})/2 = 3.00 \text{ eV}$$

$$E_{1/2}^{\text{red}*} = -1.73 \text{ V} + 3.00 \text{ eV} = 1.27 \text{ V vs Ag/AgCl, KCl (sat'd)}$$

$$E_{1/2}^{\text{red}*} = 1.27 \text{ V} - 0.045 \text{ V} = 1.23 \text{ V vs SCE}$$

**PC** (red line):  $E_{1/2}^{\text{red}} = -0.66 \text{ V vs Ag/AgCl, KCl (sat'd)}$

$$E_{0,0}^{\text{S}1} = (2.59 \text{ eV (479 nm)} + 2.76 \text{ eV (458 nm)})/2 = 2.65 \text{ eV}$$

$$E_{1/2}^{\text{red}*} = -0.66 \text{ V} + 2.65 \text{ eV} = 1.99 \text{ V vs Ag/AgCl, KCl (sat'd)}$$

$$E_{1/2}^{\text{red}*} = 1.99 \text{ V} - 0.045 \text{ V} = 1.95 \text{ V vs SCE}$$

## 5. Determination of singlet oxygen species<sup>3</sup>

1,3-Diphenylbenzo[*c*]furan (DPBF, 0.2 mmol, 54.0 mg), B(C<sub>6</sub>F<sub>5</sub>)<sub>3</sub>·H<sub>2</sub>O (5 mol%, 5.1 mg), and 1-methyl-3-(1-methyl-1H-indol-3-yl)quinoxalin-2(1H)-one (**3ab**, 10mol%), were added into 2.0 mL 1,2-dichloroethane. The resulting solution was stirred at room temperature under air and blue LEDs for 0.5 h. Then, the reaction mixture was filtered, and the solvent was evaporated in vacuum. The crude product was purified by flash column chromatography on silica gel using petroleum ether and ethyl acetate (PE: EA= 20:1) as eluent.

### Scheme S2 Determination of singlet oxygen species

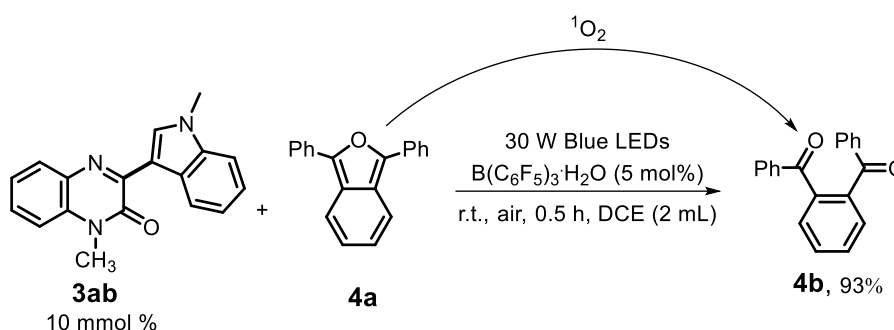

## 6. Light on/off experiments

The light on/off experiment following the standard condition: A 10 mL reaction vial equipped with a stir bar was charged with **1a** (32.0 mg, 0.2 mmol), indole **2b** (39.4 mg, 0.3 mmol), B(C<sub>6</sub>F<sub>5</sub>)<sub>3</sub>·H<sub>2</sub>O (5.1 mg, 5mol%), and DCE (2 mL). The reaction mixture was irradiated by a 30 W blue LED lamp (approximately 1 cm away from the reaction vessel) at room temperature for corresponding time. Afterwards, the product **3ab** was detected by GC. These results demonstrated that light is necessary for the reaction.

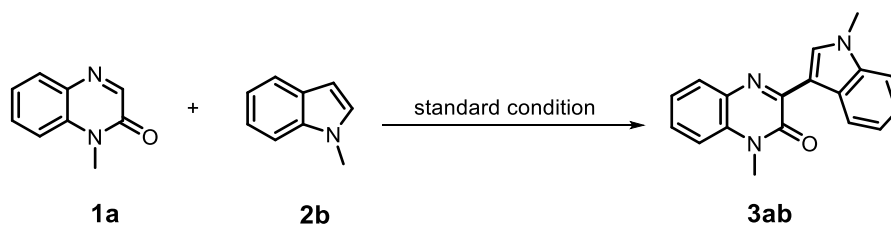

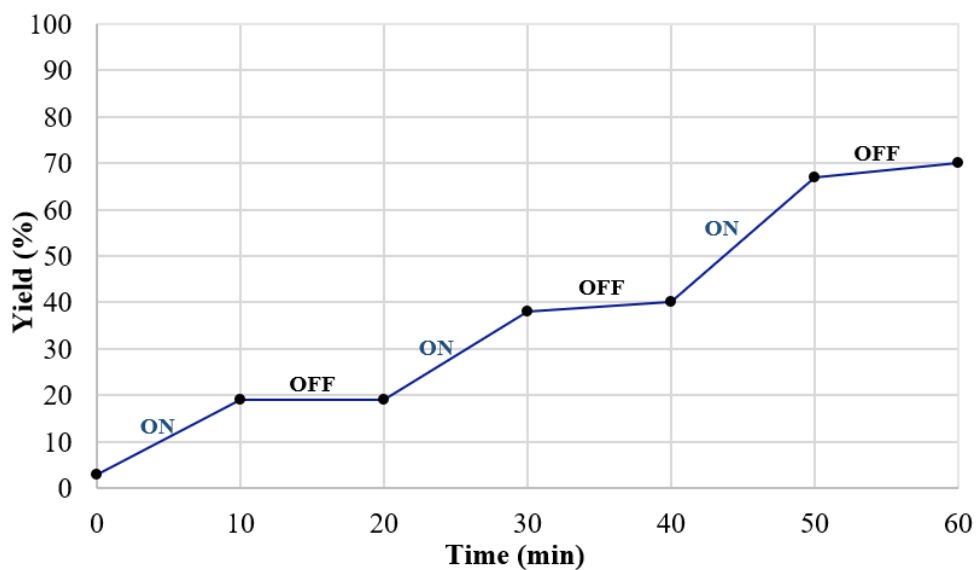

**Figure S5** Light on/off experiment with  $B(C_6F_5)_3 \cdot H_2O$ -catalyzed photoredox coupling reaction of **1a** and **2b**.

### 7. Reaction profiles

The experimental time plot following the standard condition: A 10 mL reaction vial equipped with a stir bar was charged with **1a** (32.0 mg, 0.2 mmol), indole **2b** (39.4 mg, 0.3 mmol),  $B(C_6F_5)_3 \cdot H_2O$  (5.1 mg, 5 mol%), and DCE (2 mL). The reaction mixture was irradiated by a 30 W blue LED lamp (approximately 1 cm away from the reaction vessel) at room temperature for corresponding time. Afterwards, the product **3ab** was detected by GC. As the reaction time proceeds, the reaction rate is gradually accelerated. These results demonstrated that product **3** was able to catalyze the reaction under standard conditions. (for example: **1a** and **2b** in figure S3)

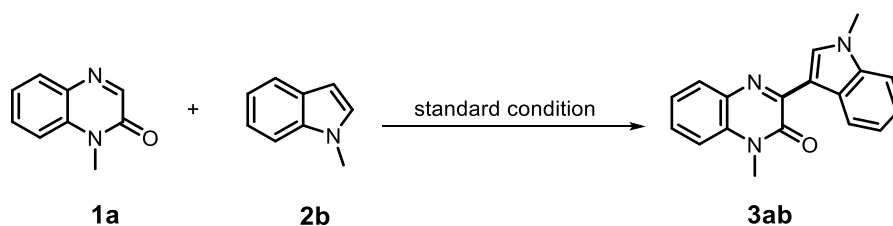

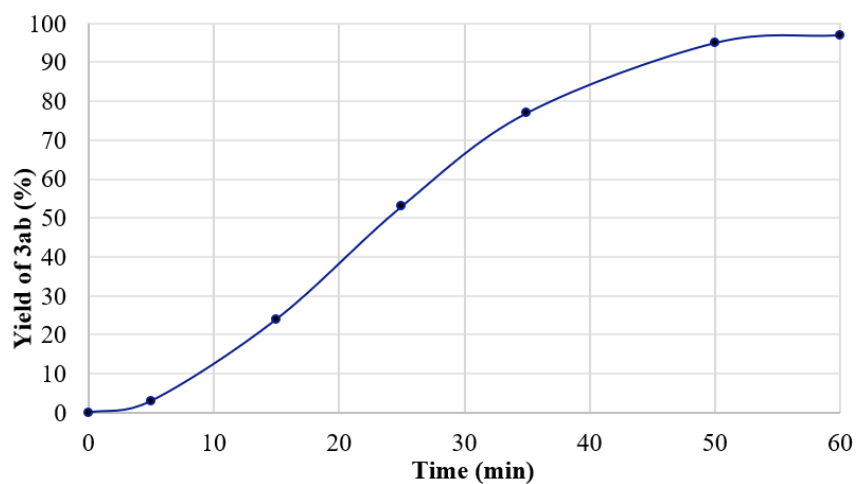

**Figure S6** Reaction profiles of  $B(C_6F_5)_3 \cdot H_2O$ -catalyzed photoredox coupling reaction of **1a** and **2b**.

### 8. UV-Vis absorption spectra

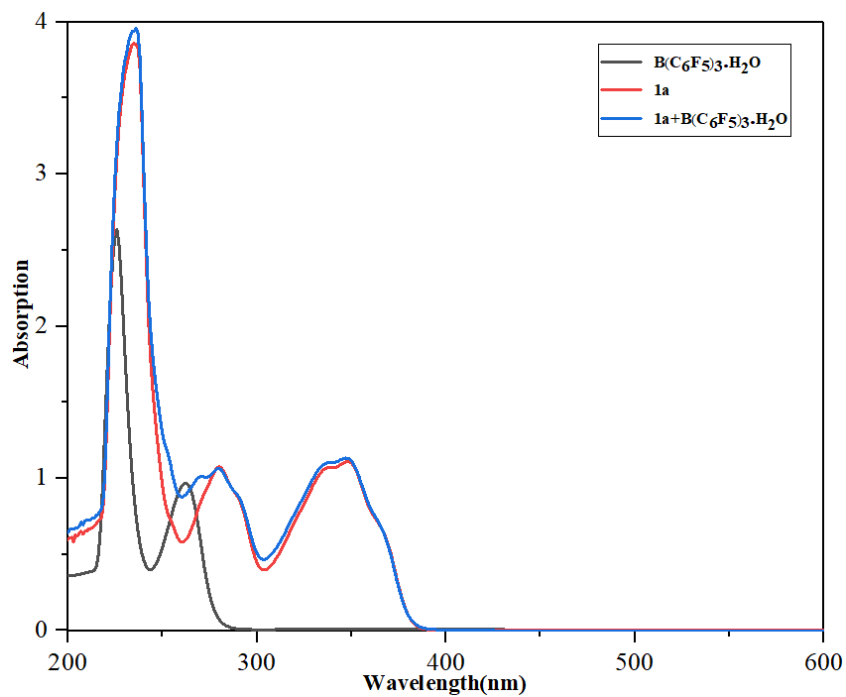

**Figure S7** Absorption spectra of **1a**,  $B(C_6F_5)_3 \cdot H_2O$ , and **1a**+  $B(C_6F_5)_3 \cdot H_2O$  in DCE

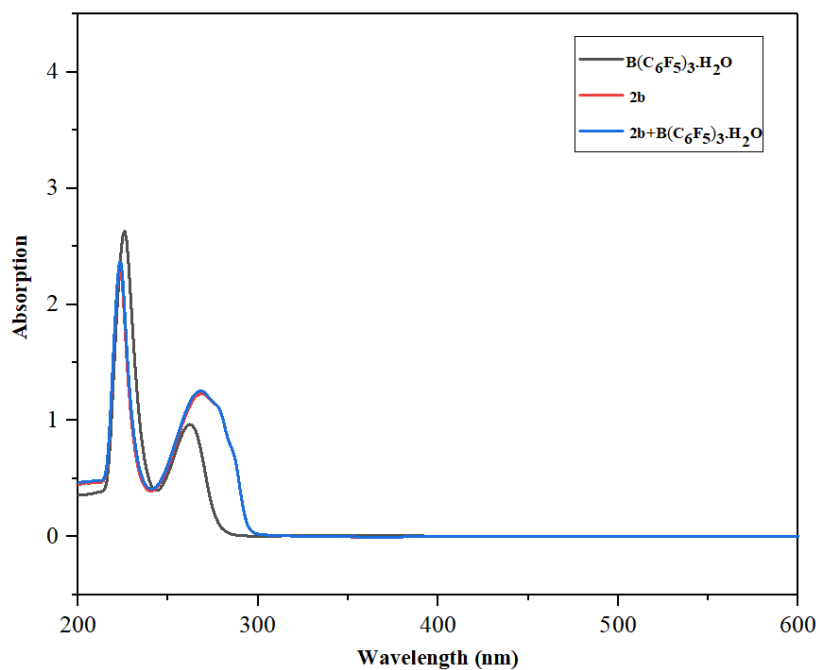

**Figure S8** Absorption spectra of **2b**,  $B(C_6F_5)_3 \cdot H_2O$ , and **2b** +  $B(C_6F_5)_3 \cdot H_2O$  in DCE

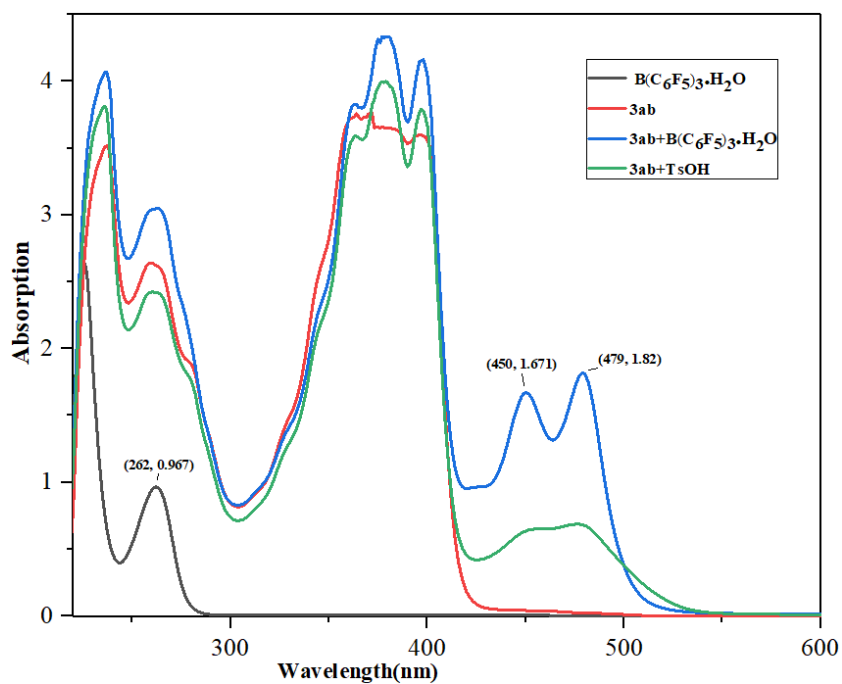

**Figure S9** Absorption spectra of **3ab**,  $B(C_6F_5)_3 \cdot H_2O$ , **3ab** +  $B(C_6F_5)_3 \cdot H_2O$  and **3ab** + TsOH in DCE

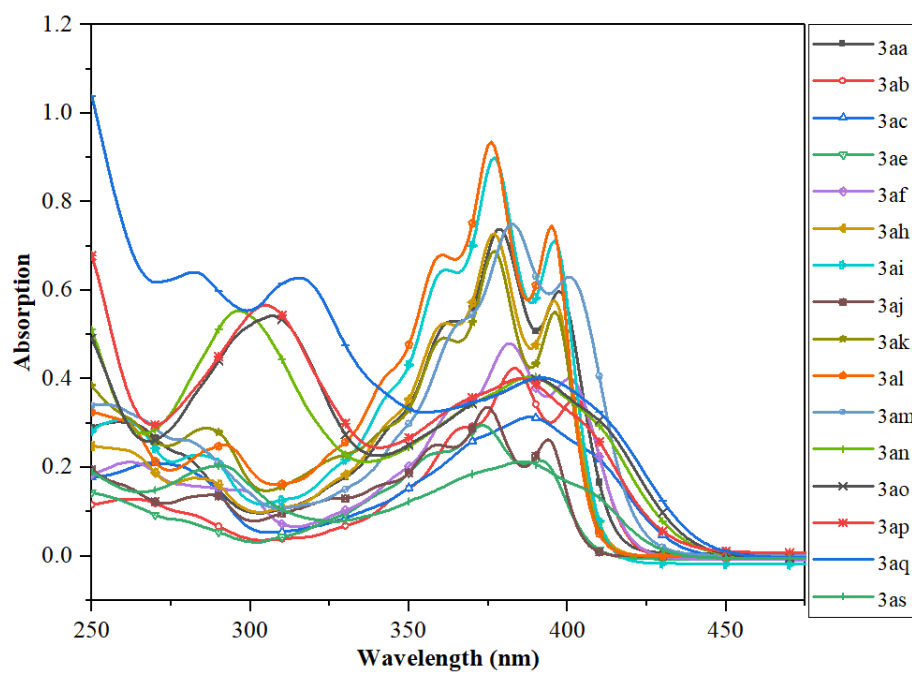

**Figure S10** Absorption spectra of **3ab-3as** in EA at the concentration  $2 \times 10^{-5}$  M

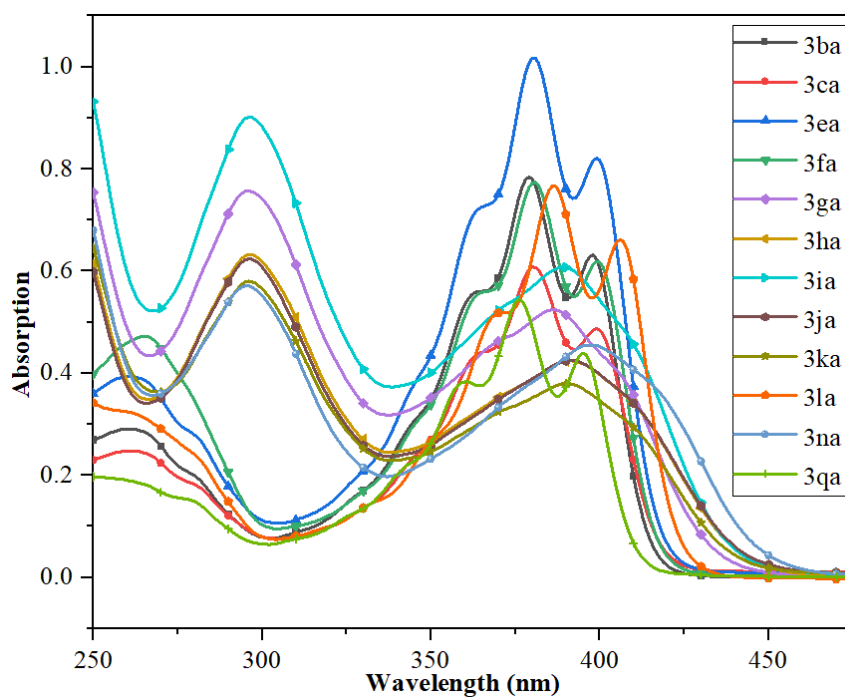

**Figure S11** Absorption spectra of **3ba-3na** in EA at the concentration  $2 \times 10^{-5}$  M



## 9. Fluorescence spectra

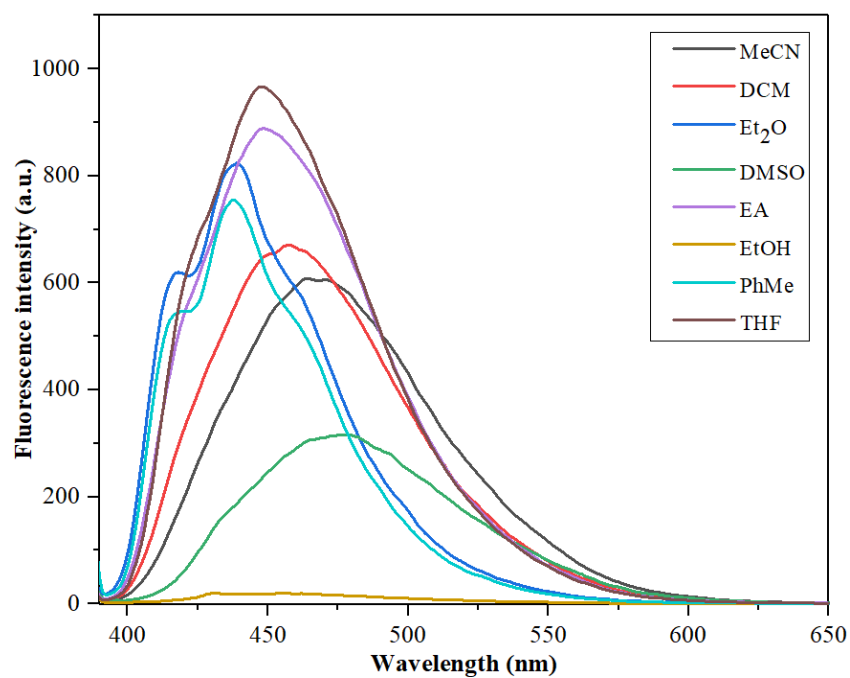

**Figure S12** Fluorescence spectra of **3aa** in different solvents at the concentration  $2 \times 10^{-7}$  M

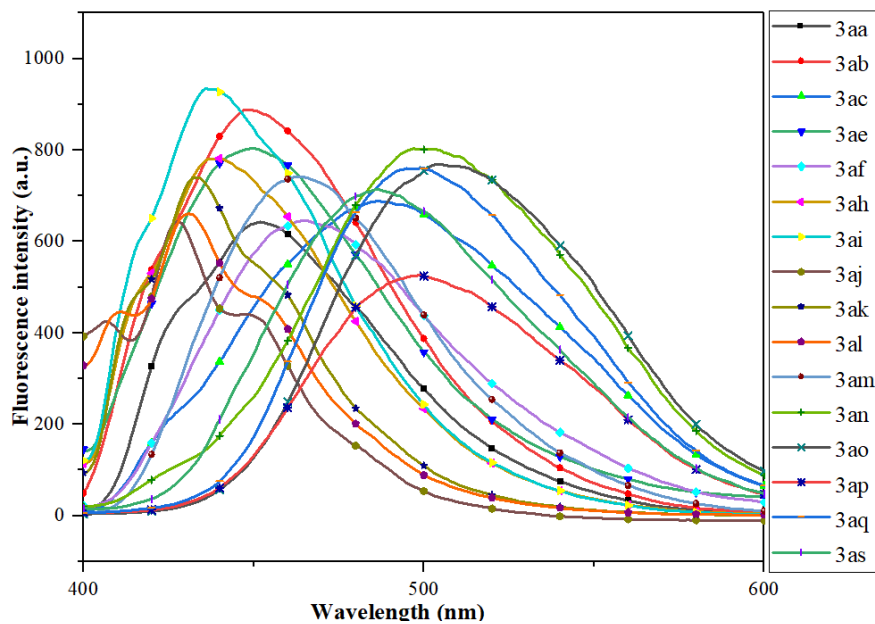

**Figure S13** Fluorescence spectra of **3aa-3as** in EA at the concentration  $2 \times 10^{-6}$  M

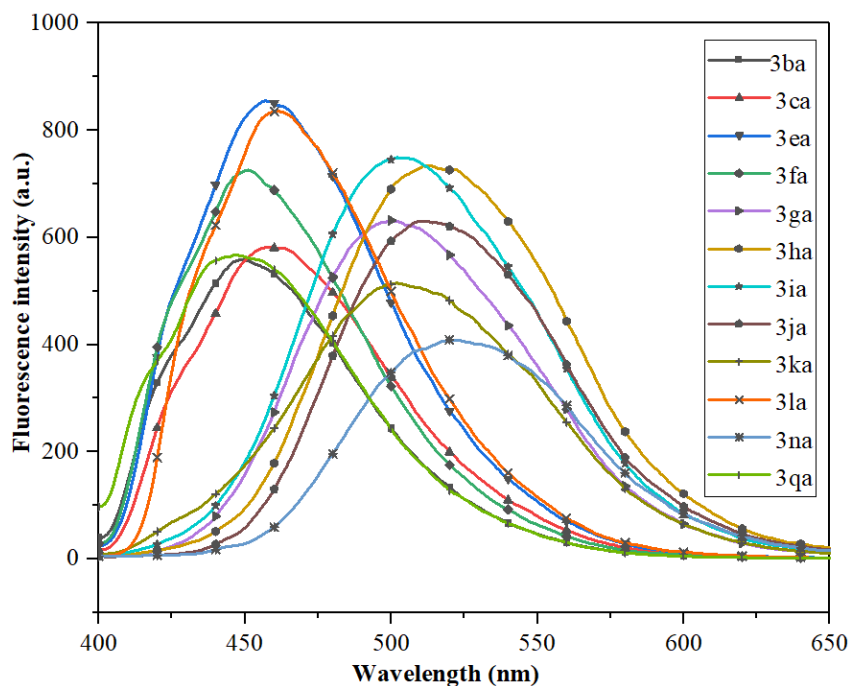

**Figure S14** Fluorescence spectra of **3ba-3qa** in EA at the concentration  $2 \times 10^{-6}$  M.

### 10. Spectroscopic properties of fluorophores **3**<sup>6</sup>

**Table S2** Summary of the measured photophysical properties of selected **3**

| entry | product    | $\lambda_{\text{abs}}^a$ (nm) | $\lambda_{\text{em}}^b$ (nm) | stokes shift (nm/cm <sup>-1</sup> ) | $\Phi_F^c$ (%) |
|-------|------------|-------------------------------|------------------------------|-------------------------------------|----------------|
| 1     | <b>3aa</b> | 379                           | 449                          | 70/4113                             | 28             |
| 2     | <b>3ab</b> | 383                           | 452                          | 69/3986                             | 46             |
| 3     | <b>3ae</b> | 373                           | 449                          | 76/4538                             | 10             |
| 4     | <b>3ai</b> | 377                           | 436                          | 59/3589                             | 32             |
| 5     | <b>3ak</b> | 377                           | 432                          | 55/3377                             | 20             |
| 6     | <b>3al</b> | 376                           | 431                          | 55/3394                             | 30             |
| 7     | <b>3an</b> | 391                           | 499                          | 108/5535                            | 3              |
| 8     | <b>3ba</b> | 379                           | 450                          | 71/4163                             | 38             |
| 9     | <b>3ca</b> | 380                           | 459                          | 79/4530                             | 51             |
| 10    | <b>3ea</b> | 380                           | 456                          | 76/4386                             | 48             |
| 11    | <b>3fa</b> | 381                           | 451                          | 70/4074                             | 44             |
| 12    | <b>3ga</b> | 386                           | 500                          | 114/5907                            | 2              |
| 13    | <b>3la</b> | 386                           | 460                          | 74/4168                             | 29             |
| 14    | <b>3na</b> | 398                           | 519                          | 121/5858                            | 2              |

<sup>a</sup>Absorption maximum. <sup>b</sup>Emission maximum. <sup>c</sup>Relative quantum yields determined by an integrating sphere system in ethyl acetate.

The calculation formula of quantum yield was adopted as follows:

$$\Phi_s = \frac{F_s}{F_r} \times \frac{A_r}{A_s} \times \frac{n_s^2}{n_r^2} \times \Phi_r$$

Where, s and r represent sample and reference respectively. A is the absorbance. F is the relative integrated fluorescence intensity, and n is the refractive index of the solvent. The reference material in this paper is quinine, whose luminescence quantum yield in aqueous 0.5 M H<sub>2</sub>SO<sub>4</sub> solution is 0.546.<sup>7</sup>

## 11. References

- [1] (a) Carrër, A.; Brion, J.-D.; Messaoudi, S.; Alami, M., Palladium(II)-Catalyzed Oxidative Arylation of Quinoxalin-2(1H)-ones with Arylboronic Acids. *Org. Lett.* **2013**, *15*, 5606-5609; (b) McAtee, J. J.; Dodson, J. W.; Dowdell, S. E.; Girard, G. R.; Goodman, K. B.; Hilfiker, M. A.; Sehon, C. A.; Sha, D.; Wang, G. Z.; Wang, N.; Viet, A. Q.; Zhang, D.; Aiyar, N. V.; Behm, D. J.; Carballo, L. H.; Evans, C. A.; Fries, H. E.; Nagilla, R.; Roethke, T. J.; Xu, X.; Yuan, C. C. K.; Douglas, S. A.; Neeb, M. J., Development of potent and selective small-molecule human Urotensin-II antagonists. *Bioorg. Med. Chem. Lett.* **2008**, *18*, 3500-3503.
- [2] (a) W. Liu, X. Yang, Z.-Z. Zhou and C.-J. Li, *Chem.*, **2017**, *2*, 688-702; (b) C.-Y. Huang, J. Li and C.-J. Li, *Nat. Commun.*, **2021**, *12*, 4010; (c) M. Bhakat, B. Khatua and J. Guin, *Org. Lett.*, **2022**, *24*, 5276-5280.
- [3] Sun, R.; Yang, X.; Ge, Y.; Song, J.; Zheng, X.; Yuan, M.; Li, R.; Chen, H.; Fu, H., Visible-Light-Induced Oxazoline Formations from N-Vinyl Amides Catalyzed by an Ion-Pair Charge-Transfer Complex. *ACS Catal.* **2021**, *11*, 11762-11773.
- [4] Han, Y.-Y.; Wu, Z.-J.; Zhang, X.-M.; Yuan, W.-C., An efficient synthesis of 3-(indol-3-yl)quinoxalin-2-ones with TfOH-catalyzed Friedel-Crafts type coupling reaction in air. *Tetrahedron Lett.* **2010**, *51*, 2023-2028.
- [5] Sharma, V.; Jaiswal, P. K.; Kumar, K.; Saran, M.; Mathur, M.; Swami, A. K.; Chaudhary, S., An efficient synthesis and biological evaluation of novel analogues of natural product Cephalandole A: A new class of antimicrobial and antiplatelet agents. *Fitoterapia* **2018**, *129*, 13-19.
- [6] Yan, M.; Zhu, L.; Zhang, X.; Yin, S.-F.; Kambe, N.; Qiu, R., Nickel-Catalyzed N,N-Diarylation of 8-Aminoquinoline with Large Steric Aryl Bromides and Fluorescence of Products. *Org. Lett.* **2021**, *23*, 2514-2520.
- [7] Wang, C.; Zhang, H.; Zhang, J.; Lv, N.; Li, M.; Sun, H.; Yang, B., Ligand Dynamics of Aqueous CdTe Nanocrystals at Room Temperature. *J. Phys. Chem. C* **2008**, *112*, 6330-6336.

## 12. Characterization data for the products

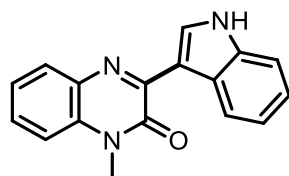

**3-(1H-indol-3-yl)-1-methylquinoxalin-2-one (3aa).** A known

compound.<sup>4</sup> Orange solid, 51.7 mg, yield 94%. <sup>1</sup>H NMR (400 MHz, DMSO-*d*<sub>6</sub>): δ 11.79

(s, 1H), 8.95 – 8.86 (m, 3H), 7.91 (d,  $J = 7.9$  Hz, 1H), 7.59 – 7.47 (m, 3H), 7.44 – 7.35 (m, 1H), 7.29 – 7.19 (m, 2H), 3.73 (s, 3H);  $^{13}\text{C}$  NMR (101 MHz,  $\text{DMSO-}d_6$ )  $\delta$  154.1, 151.1, 136.7, 133.6, 133.4, 131.9, 128.8, 128.7, 126.7, 123.9, 123.4, 123.0, 121.4, 114.8, 112.3, 111.9, 29.6.

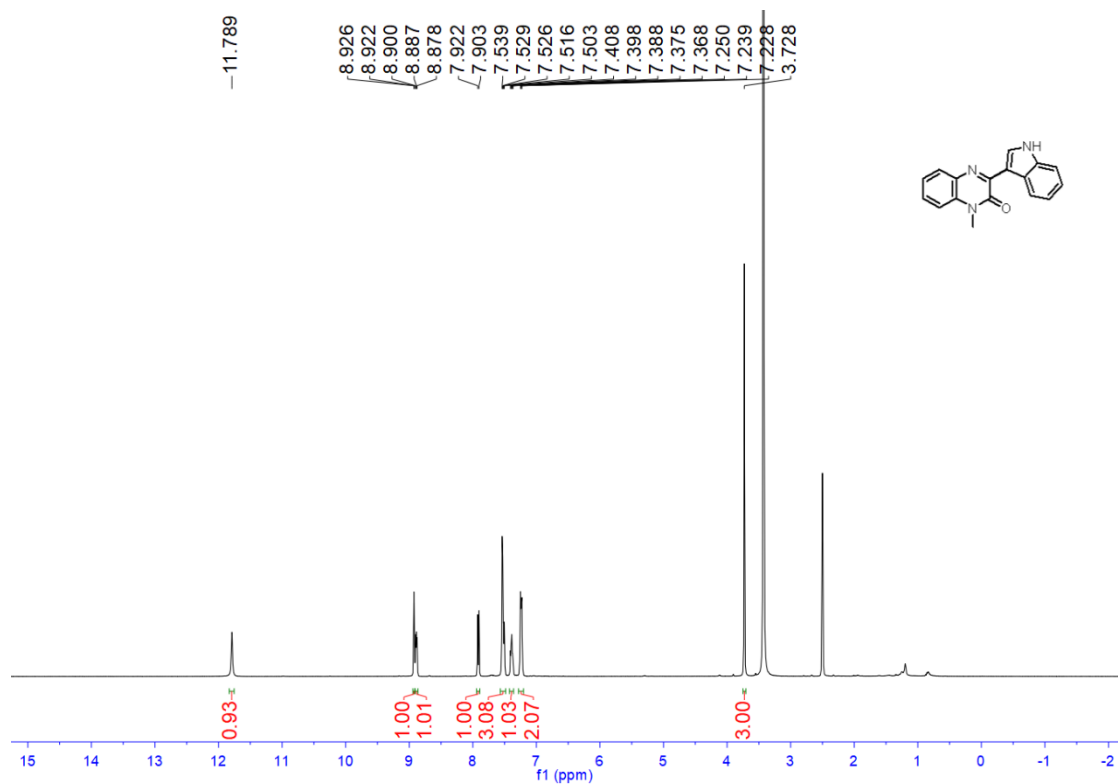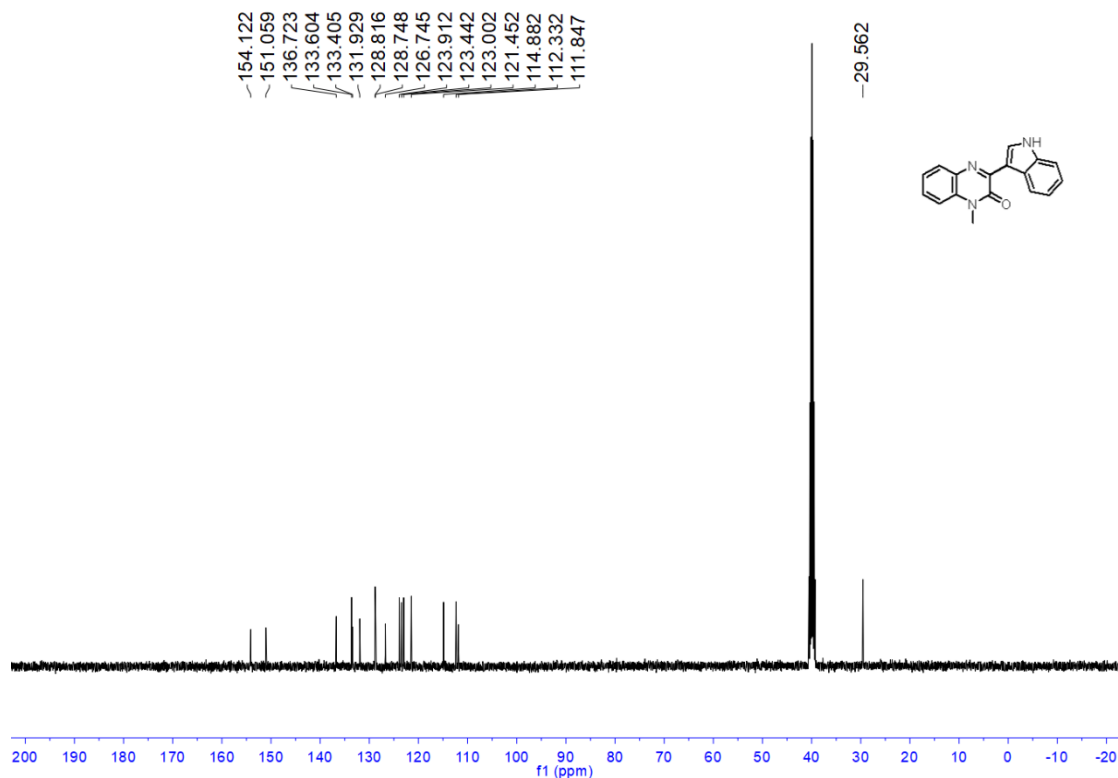

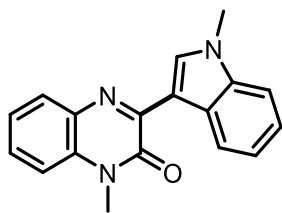

**1-methyl-3-(1-methyl-1*H*-indol-3-yl)quinoxalin-2(1*H*)-one**

**(3ab)**. Orange solid, 52.6 mg, yield 91%. m.p.: 232.9-233.8 °C. <sup>1</sup>H NMR (400 MHz, CDCl<sub>3</sub>, TMS): δ 9.05 – 8.99 (m, 1H), 8.83 (s, 1H), 8.00 – 7.95 (m, 1H), 7.48 – 7.42 (m, 1H), 7.40 – 7.31 (m, 4H), 7.30 – 7.26 (d, *J* = 8.2 Hz, 1H), 3.86 (s, 3H), 3.77 (s, 3H). <sup>13</sup>C NMR (101 MHz, CDCl<sub>3</sub>, TMS): δ 154.6, 150.8, 137.1, 136.7, 133.9, 131.6, 129.3, 128.0, 127.5, 123.64, 123.5, 122.8, 121.5, 33.3, 29.1. HRMS (ESI, *m/z*) calcd for C<sub>18</sub>H<sub>16</sub>N<sub>3</sub>O<sup>+</sup> [M+H]<sup>+</sup>: 290.1288, found 290.1288.

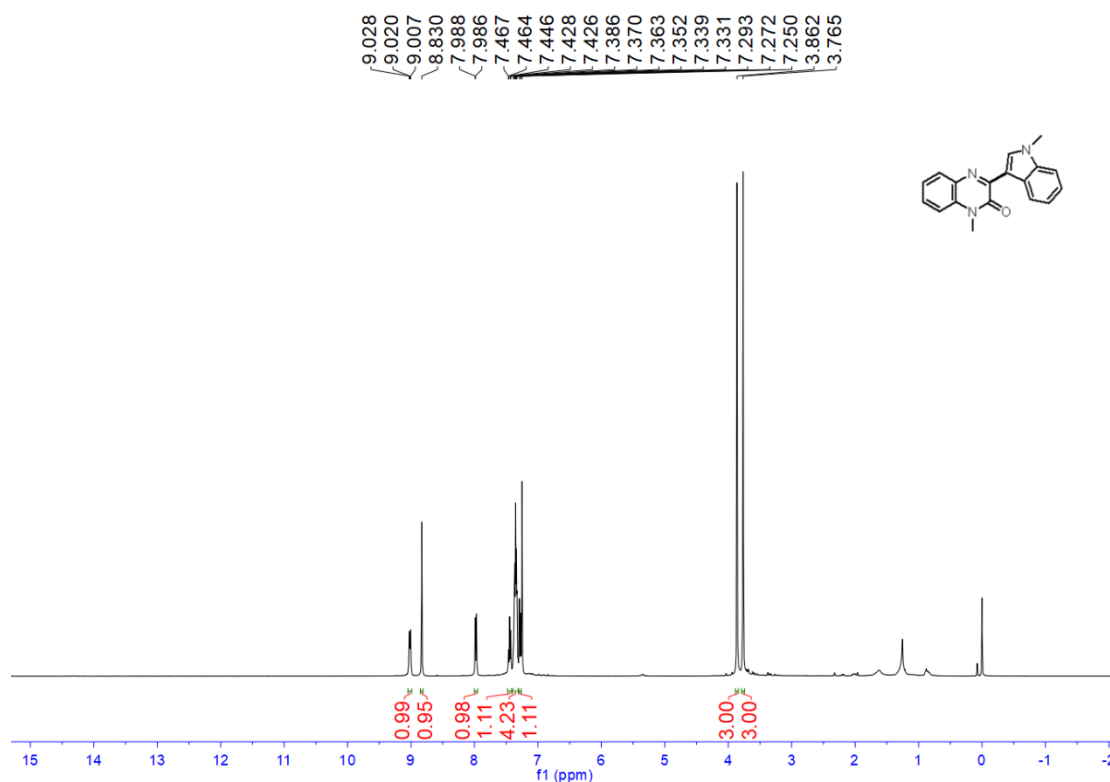

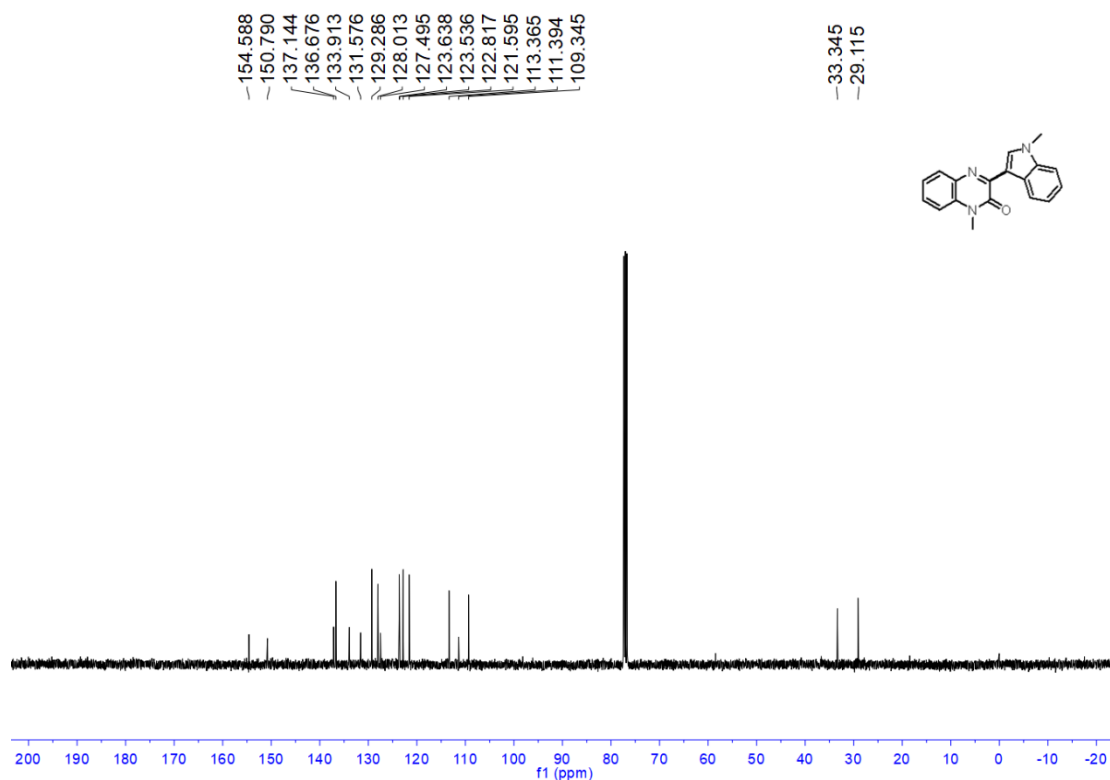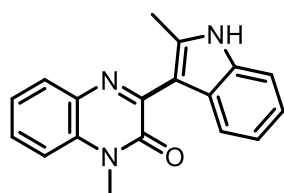

**1-methyl-3-(2-methyl-1H-indol-3-yl)quinoxalin-2(1H)-one**

**(3ac)**. A known compound.<sup>4</sup> Orange solid, 54.7 mg, yield 94%. <sup>1</sup>H NMR (400 MHz, DMSO-*d*<sub>6</sub>) δ 11.51 (s, 1H), 7.83 – 7.74 (m, 2H), 7.61 – 7.50 (m, 2H), 7.40 – 7.32 (m, 2H), 7.11 – 7.05 (m, 1H), 7.05 – 6.99 (m, 1H), 3.70 (s, 3H), 2.55 (s, 3H). <sup>13</sup>C NMR (101 MHz, DMSO-*d*<sub>6</sub>) δ 154.5, 153.6, 139.7, 135.5, 133.3, 133.0, 129.5, 129.1, 128.4, 123.8, 121.3, 120.0, 114.9, 111.1, 109.9, 29.7, 14.7.

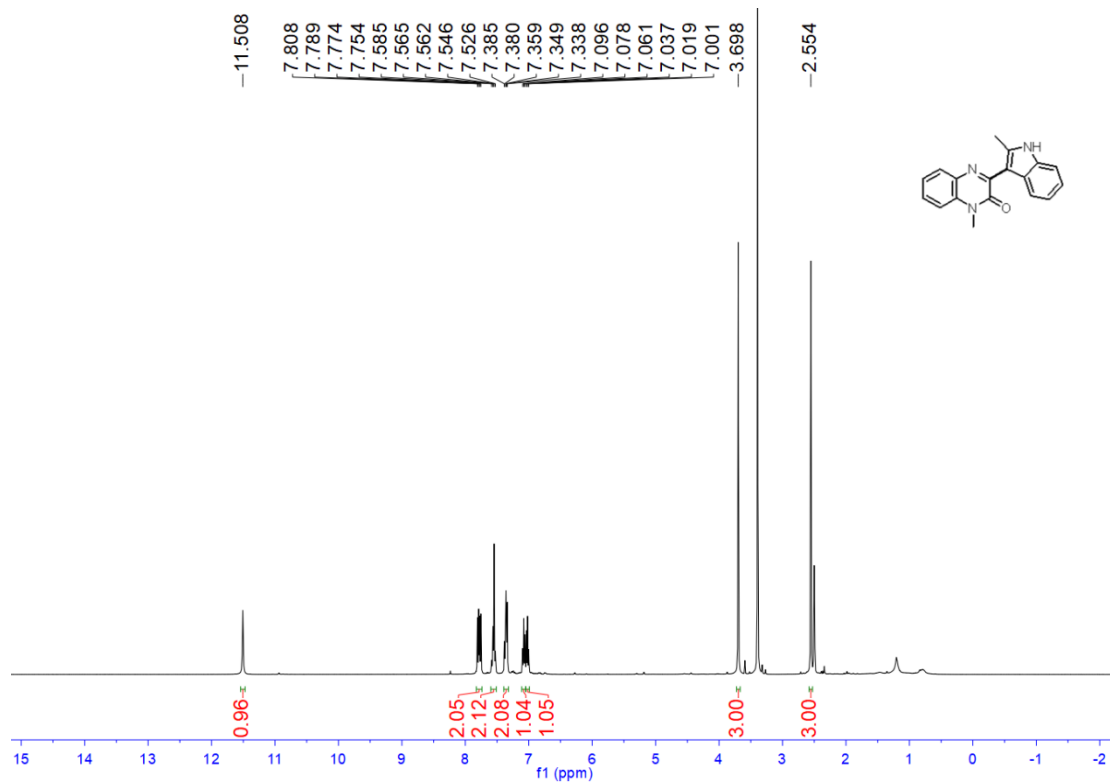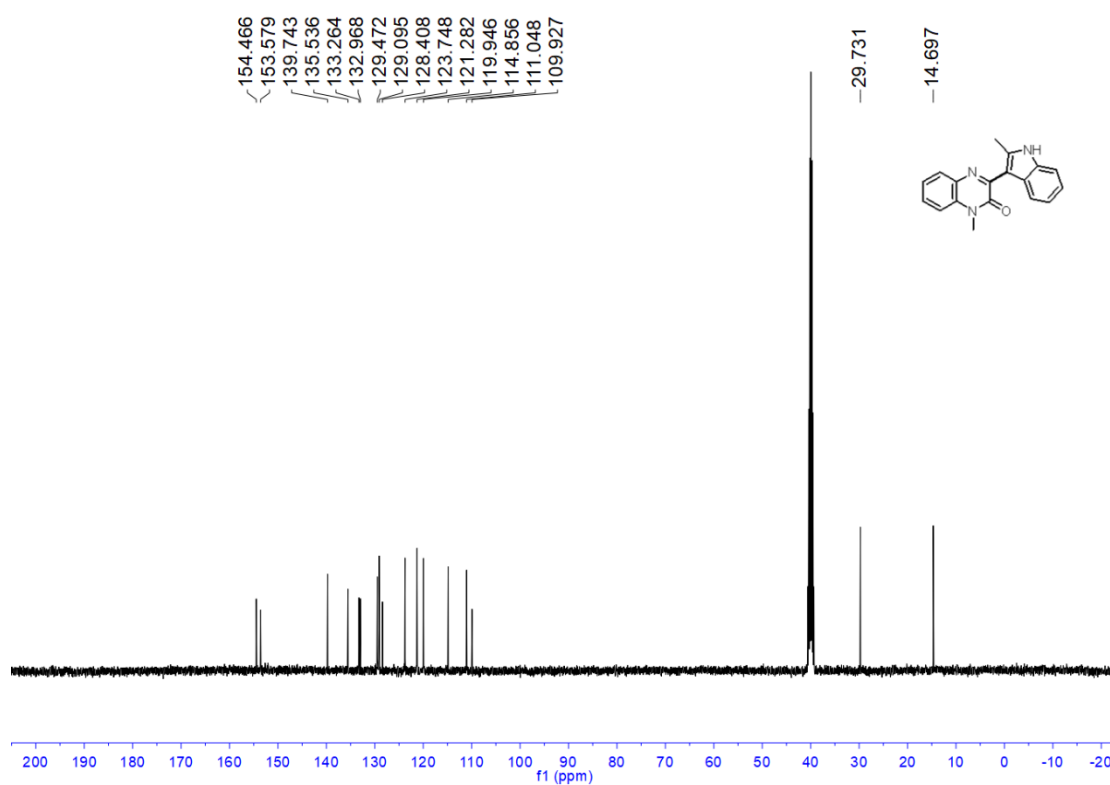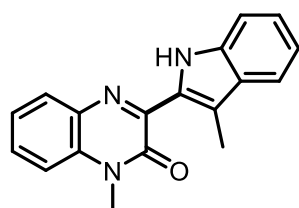

**1-methyl-3-(3-methyl-1H-indol-2-yl)quinoxalin-2(1H)-one**

**(3ad)**. Yellow solid, 55.6 mg, yield 96%. m.p.: 281.3-281.9 °C. <sup>1</sup>H NMR (400 MHz, DMSO-*d*<sub>6</sub>) δ 11.61 (s, 1H), 7.82 (d, *J* = 7.8 Hz, 1H), 7.65 – 7.60 (m, 2H), 7.59 – 7.51 (m, 2H), 7.39 (dd, *J*<sub>1</sub> = *J*<sub>2</sub> = 7.1 Hz, 1H), 7.20 (dd, *J*<sub>1</sub> = *J*<sub>2</sub> = 7Hz, 1H), 7.04 (dd, *J*<sub>1</sub> = *J*<sub>2</sub> = 7.5 Hz, 1H), 3.70 (s, 3H), 3.38 (s, 3H). <sup>13</sup>C NMR (101 MHz, DMSO-*d*<sub>6</sub>) δ 154.8, 147.5, 136.3, 133.2, 132.4, 130.2, 129.7, 129.40, 128.39, 124.3, 124.1, 119.7, 119.5, 116.7, 115.1, 113.0, 29.7, 12.2. HRMS (ESI, *m/z*) calcd for C<sub>18</sub>H<sub>16</sub>N<sub>3</sub>O<sup>+</sup> [M+H]<sup>+</sup>: 290.1288, found 290.1290.

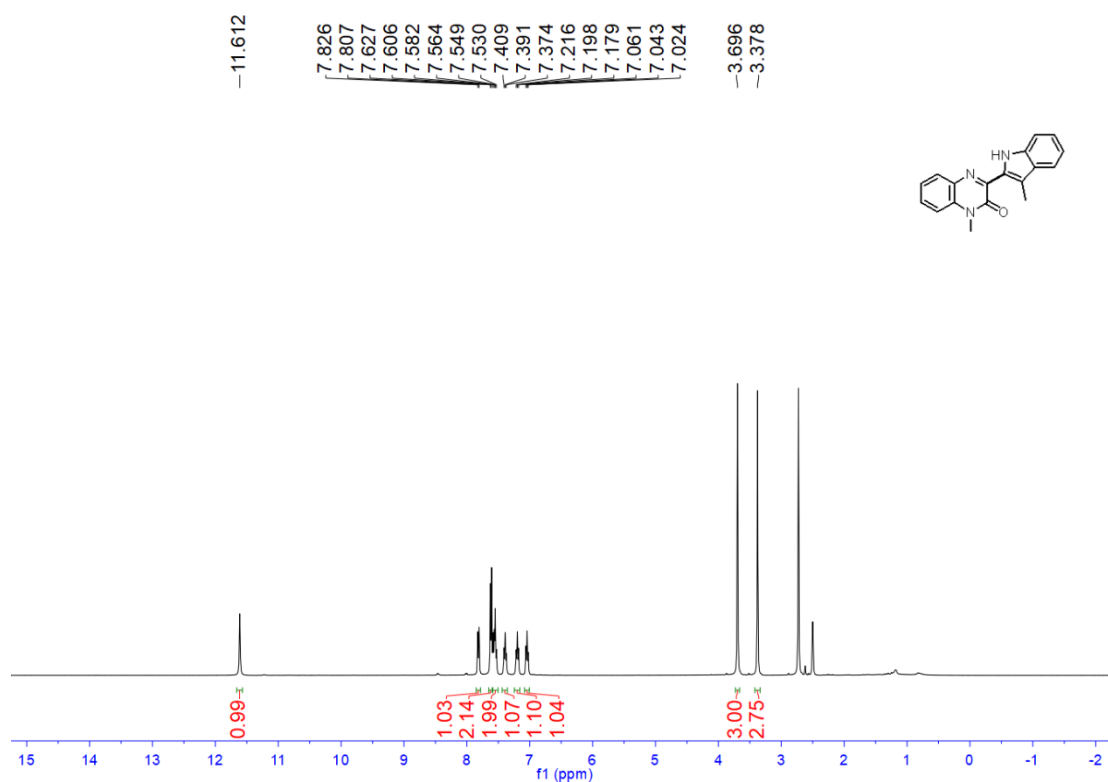



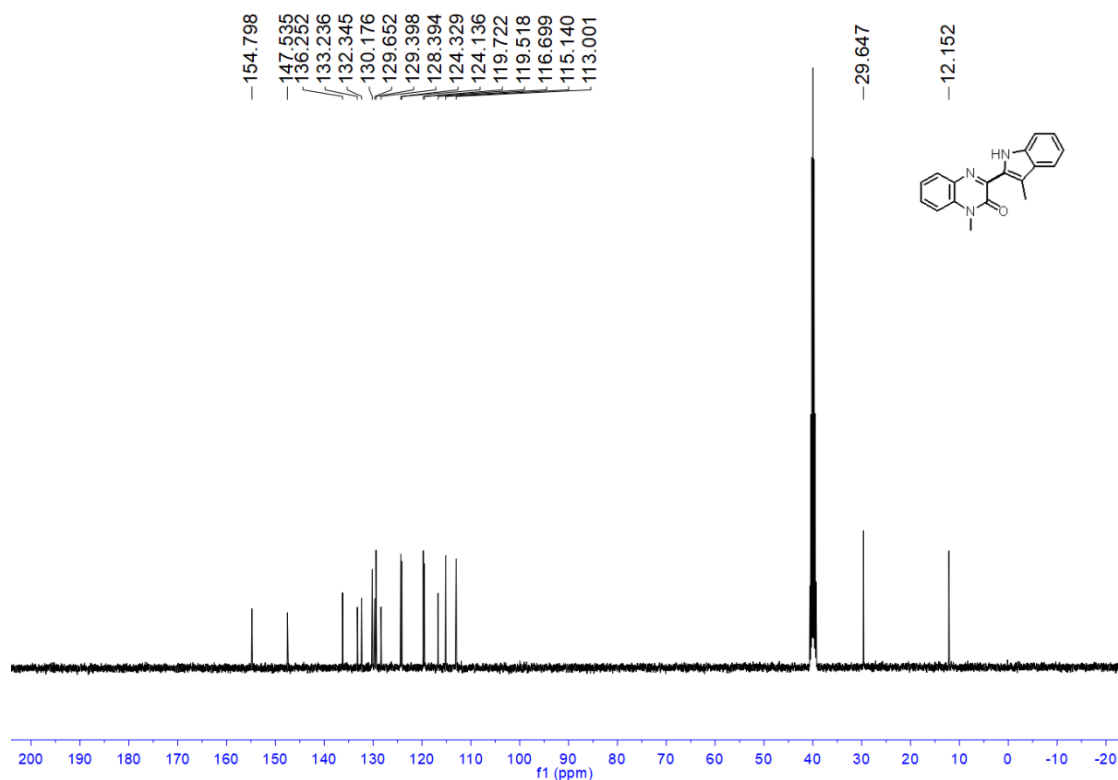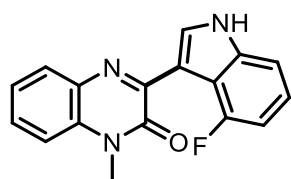

**3-(4-fluoro-1H-indol-3-yl)-1-methylquinoxalin-2(1H)-one**

(**3ae**). Orange solid, 49.7 mg, yield 85%. m.p.: 237.9-238.6 °C. <sup>1</sup>H NMR (400 MHz, DMSO-*d*<sub>6</sub>) δ 11.99 (s, 1H), 8.49 (d, *J* = 2.4 Hz, 1H), 7.78 (d, *J* = 7.7 Hz, 1H), 7.58 – 7.49 (m, 2H), 7.40 – 7.31 (m, 2H), 7.23 – 7.16 (m, 1H), 6.93 – 6.86 (m, 1H), 3.70 (s, 3H). <sup>13</sup>C NMR (101 MHz, DMSO-*d*<sub>6</sub>) δ 156.6 (d, *J* = 250.7 Hz), 154.3 (d, *J* = 1.7 Hz), 150.2, 139.6 (d, *J* = 10.9 Hz), 133.2, 132.5, 132.2, 129.4, 129.2, 123.9, 123.5 (d, *J* = 7.8 Hz), 114.9, 114.7 (d, *J* = 19.1 Hz), 111.8 (d, *J* = 4.6 Hz), 108.8 (d, *J* = 3.6 Hz), 106.9 (d, *J* = 21.5 Hz), 29.6. <sup>19</sup>F NMR (376 MHz, DMSO-*d*<sub>6</sub>) δ -107.86 to -107.90. HRMS (ESI, *m/z*) calcd for C<sub>17</sub>H<sub>13</sub>FN<sub>3</sub>O<sup>+</sup> [M+H]<sup>+</sup>: 294.1037, found 294.1040.

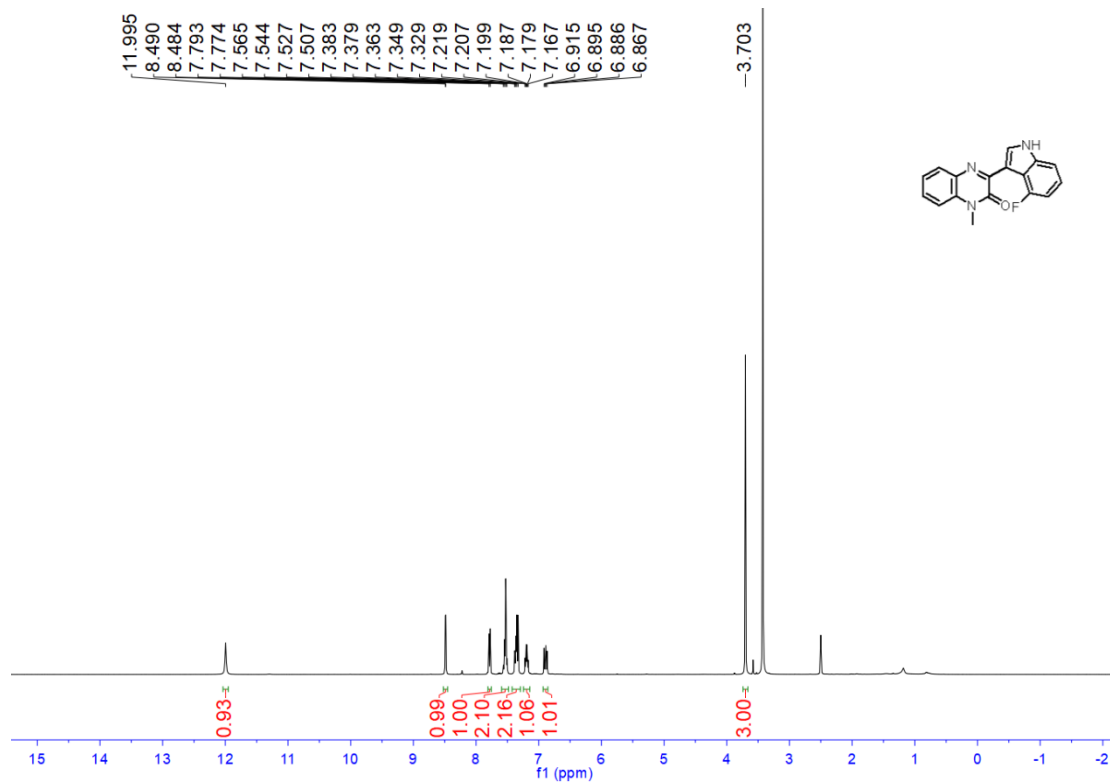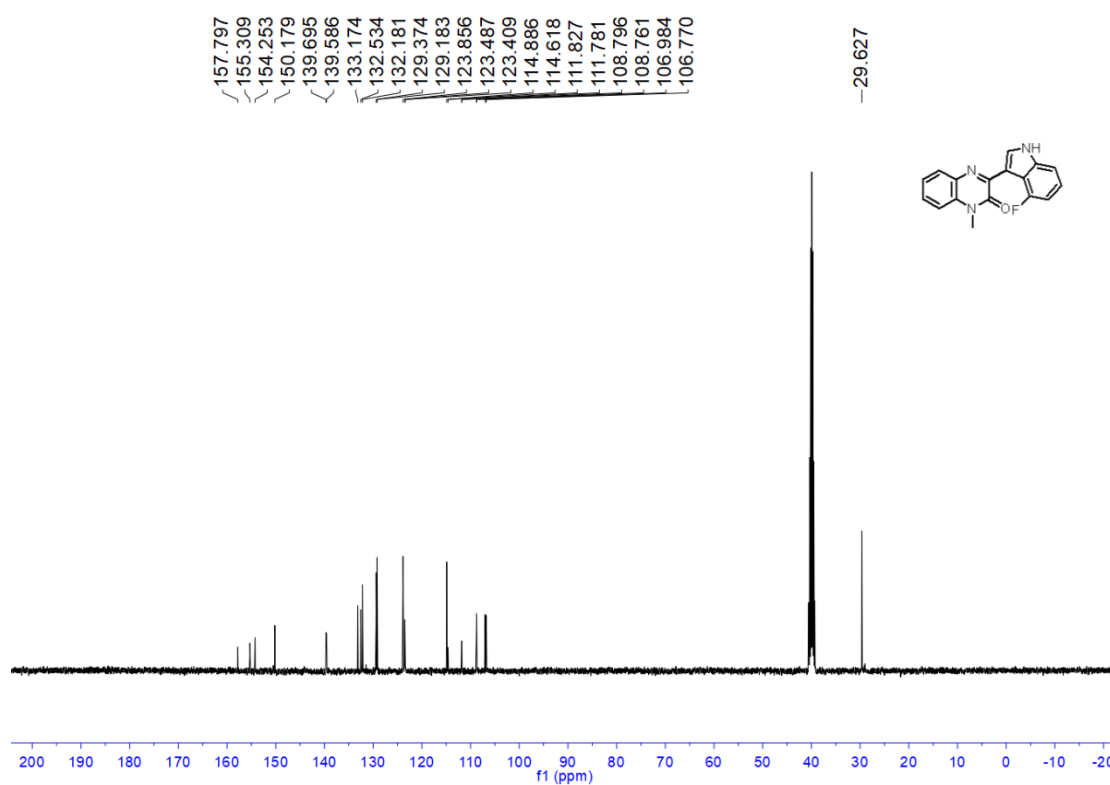

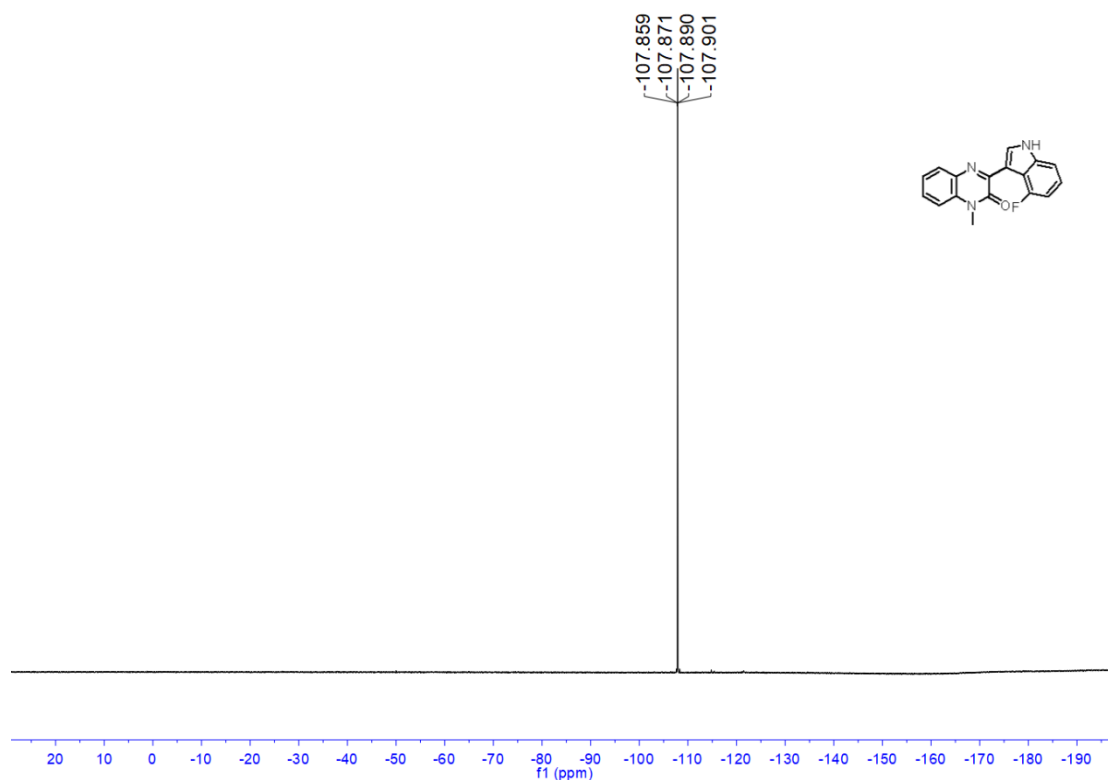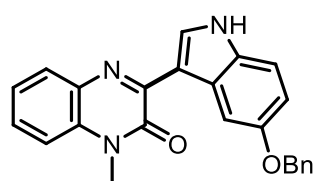

**3-(5-(benzyloxy)-1H-pyrrolo[2,3-b]pyridin-3-yl)-1-methylquinoxalin-2(1H)-one (3af).** A known compound.<sup>4</sup> Orange solid, 72.8 mg, yield 95%. <sup>1</sup>H NMR (400 MHz, DMSO-*d*<sub>6</sub>) δ 11.69 (s, 1H), 8.99 – 8.74 (m, 1H), 8.51 (d, *J* = 2.4 Hz, 1H), 7.87 (d, *J* = 7.8 Hz, 1H), 7.56 (d, *J* = 7.3 Hz, 2H), 7.51 (d, *J* = 3.8 Hz, 2H), 7.46 – 7.36 (m, 4H), 7.32 (t, *J* = 7.3 Hz, 2H), 6.97 (dd, *J* = 8.7, 2.5 Hz, 1H), 5.24 (s, 2H), 3.71 (s, 3H). <sup>13</sup>C NMR (101 MHz, DMSO-*d*<sub>6</sub>) δ 154.4, 154.1, 151.1, 138.4, 134.0, 133.3, 131.8, 131.8, 128.9, 128.6, 128.1, 128.0, 127.4, 123.8, 114.8, 113.3, 112.9, 111.6, 107.0, 70.2, 29.5.

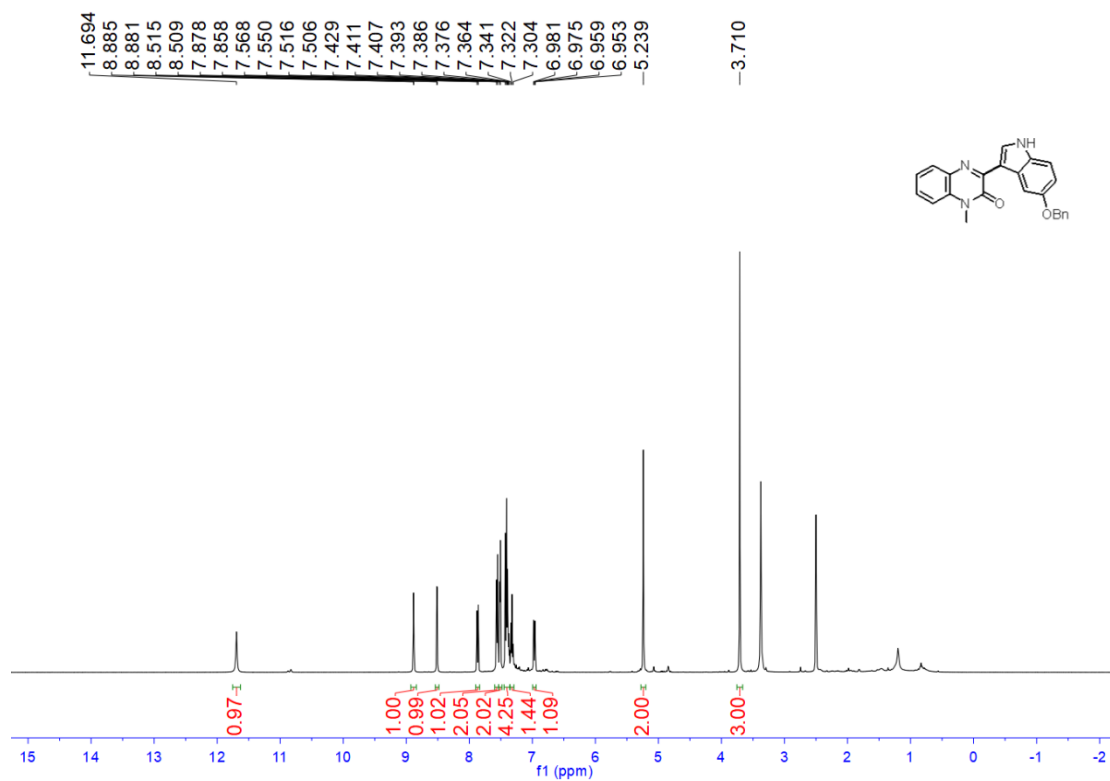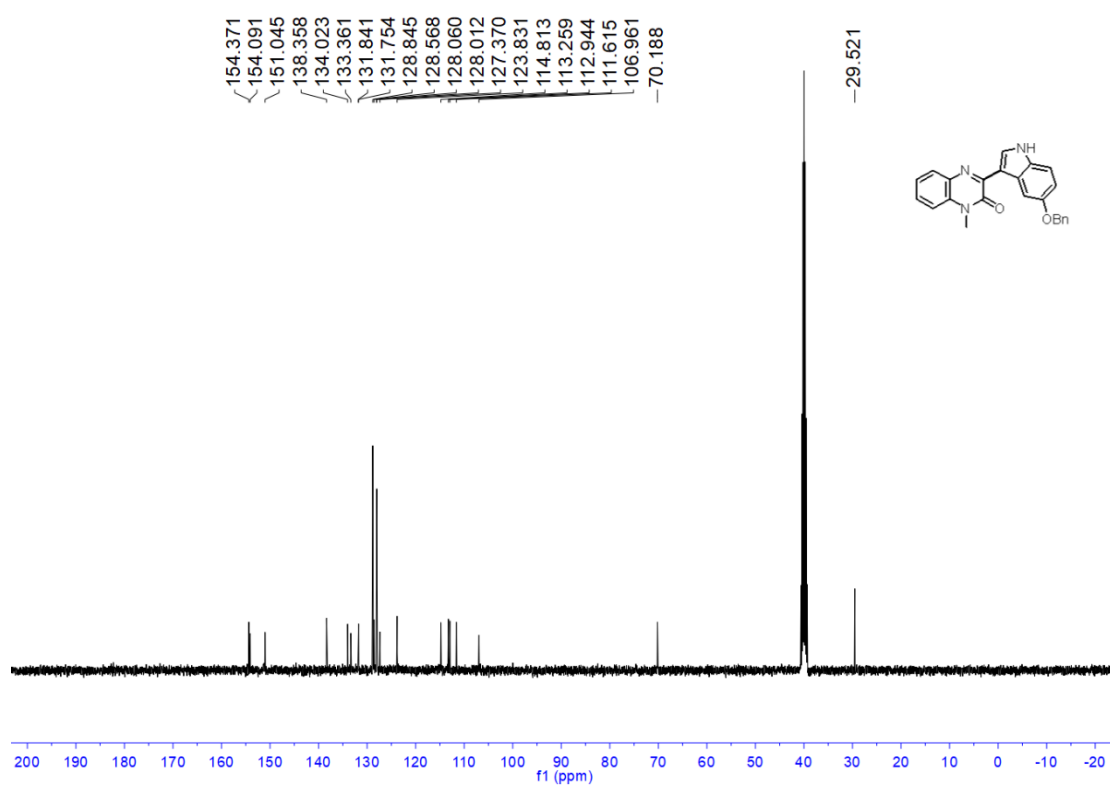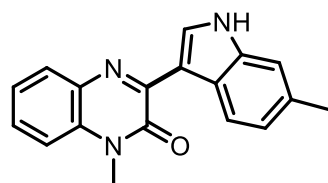

**1-methyl-3-(6-methyl-1H-indol-3-yl)quinoxalin-2(1H)-one (3ag).** Orange solid, 54.2 mg, yield 94%. m.p.: 241.7-242.3 °C. <sup>1</sup>H NMR (400 MHz,

DMSO-*d*<sub>6</sub>): δ 11.65 (s, 1H), 8.86 (d, *J* = 2.7 Hz, 1H), 8.75 (d, *J* = 8.1 Hz, 1H), 7.89 (d, *J* = 7.8 Hz, 1H), 7.54 – 7.48 (m, 2H), 7.41 – 7.33 (m, 1H), 7.30 (s, 1H), 7.06 (d, *J* = 8.1 Hz, 1H), 3.71 (s, 3H), 2.44 (s, 3H). <sup>13</sup>C NMR (101 MHz, DMSO-*d*<sub>6</sub>) δ: 154.1, 151.0, 137.2, 133.5, 133.2, 132.1, 131.9, 128.8, 128.6, 124.6, 123.8, 123.2, 123.1, 29.5, 21.8. HRMS (ESI, *m/z*) calcd for C<sub>18</sub>H<sub>16</sub>N<sub>3</sub>O<sup>+</sup> [M+H]<sup>+</sup>: 290.1288, found 290.1290.

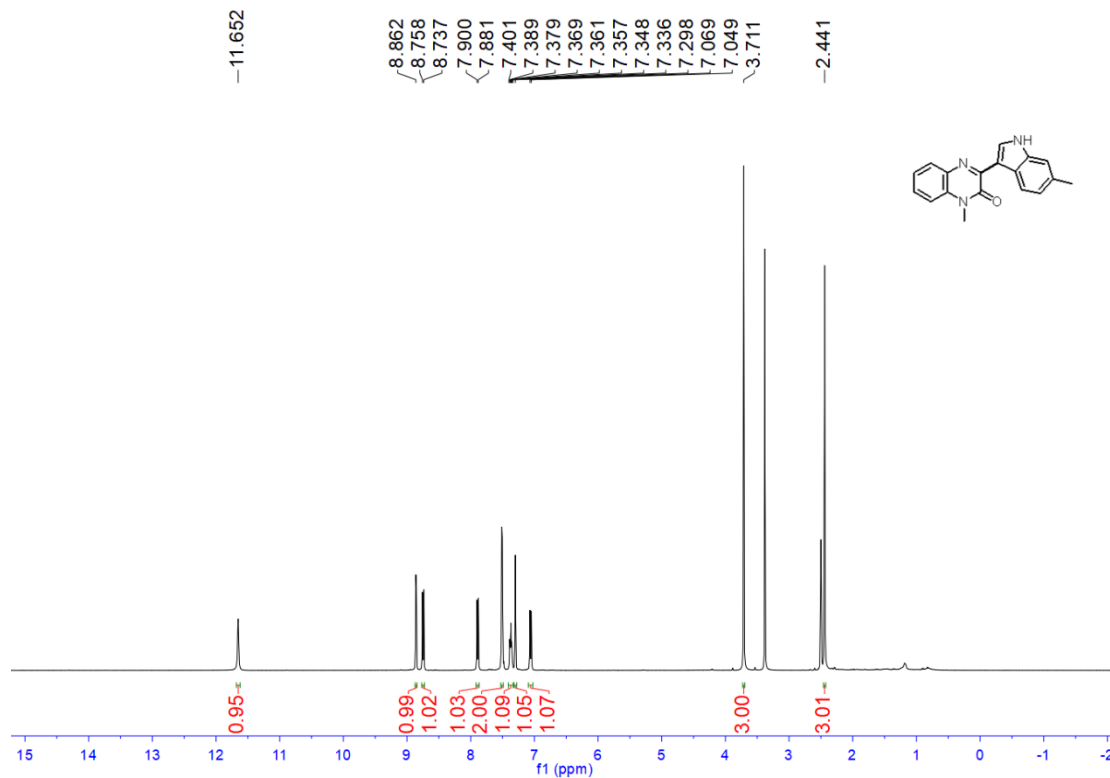

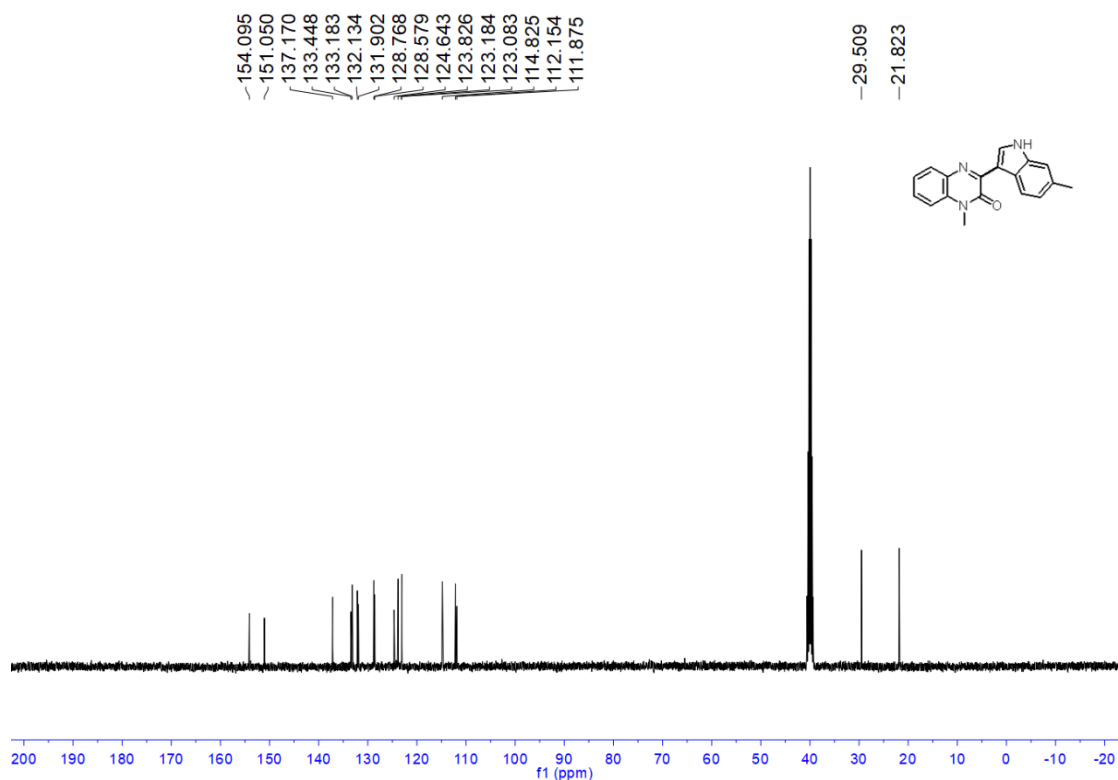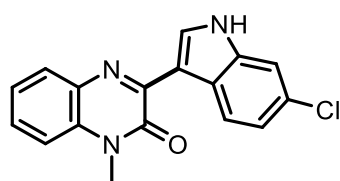

**3-(6-chloro-1H-indol-3-yl)-1-methylquinoxalin-2(1H)-**

**one (3ah).** Yellow solid, 60.3 mg, yield 97%. m.p.: 270.0-271.5 °C. <sup>1</sup>H NMR (400 MHz, DMSO-*d*<sub>6</sub>): δ 11.87 (s, 1H), 8.93 (s, 1H), 8.86 (d, *J* = 8.6 Hz, 1H), 7.91 (d, *J* = 7.9 Hz, 1H), 7.60 – 7.52 (m, 3H), 7.44 – 7.35 (m, 1H), 7.24 (dd, *J* = 8.6, 1.8 Hz, 1H), 3.73 (s, 3H). <sup>13</sup>C NMR (101 MHz, DMSO-*d*<sub>6</sub>): δ 154.0, 150.7, 137.3, 134.4, 133.2, 132.1, 129.0, 128.9, 127.6, 125.5, 124.7, 123.9, 121.6, 115.0, 112.1, 111.9, 29.6. HRMS (ESI, *m/z*) calcd for C<sub>17</sub>H<sub>12</sub>ClN<sub>3</sub>NaO<sup>+</sup> [M+Na]<sup>+</sup>: 332.0561, found 332.0565.

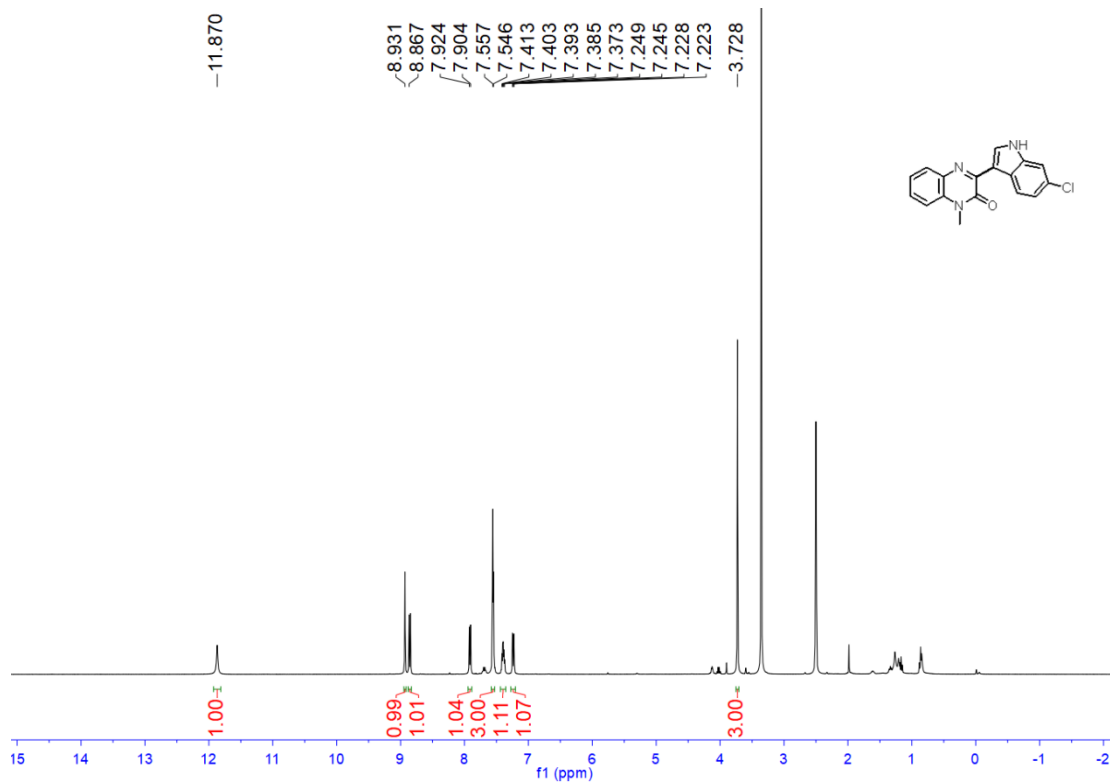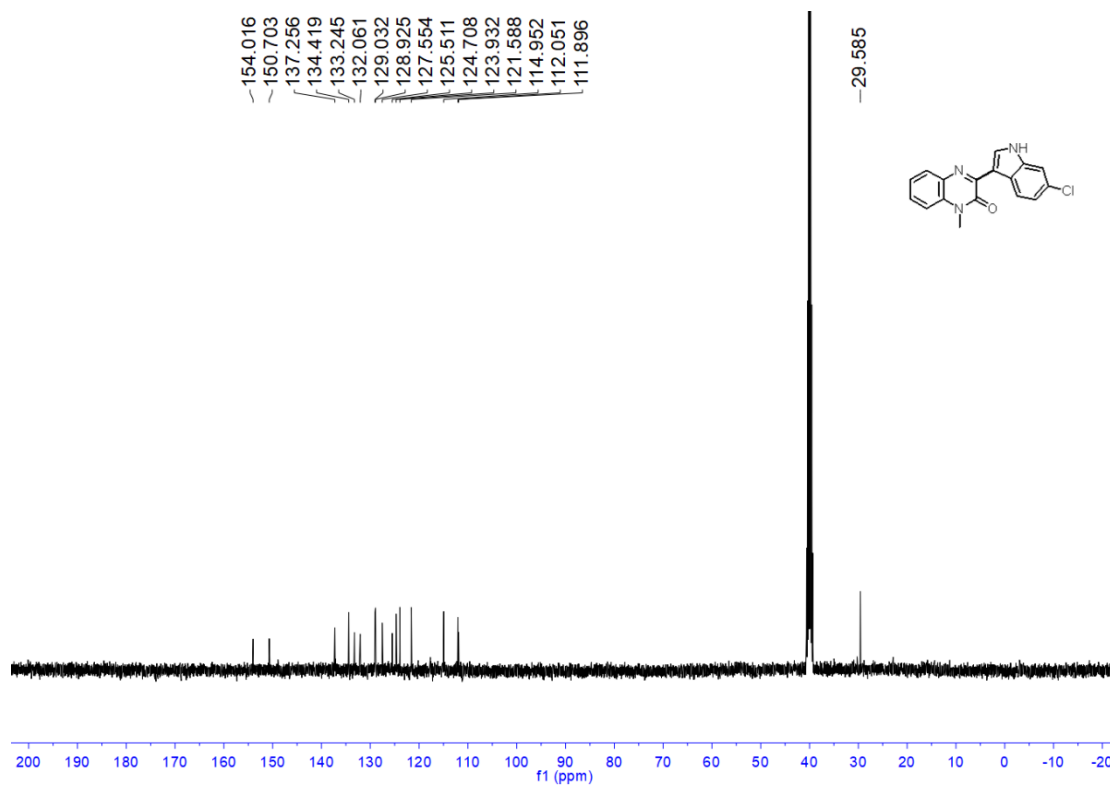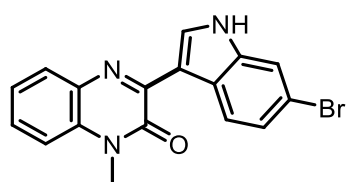

**3-(6-bromo-1H-indol-3-yl)-1-methylquinoxalin-2(1H)-**

**one (3ai).** Yellow solid, 63.0 mg, yield 89%. m.p.: 286.7-287.4 °C.  $^1\text{H}$  NMR (400 MHz,  $\text{DMSO-}d_6$ ):  $\delta$  11.87 (s, 1H), 8.92 (s, 1H), 8.80 (d,  $J = 8.6$  Hz, 1H), 7.91 (d,  $J = 7.9$  Hz, 1H), 7.70 (d,  $J = 1.4$  Hz, 1H), 7.55 (d,  $J = 3.8$  Hz, 2H), 7.44 – 7.32 (m, 2H), 3.73 (s, 3H).  $^{13}\text{C}$  NMR (101 MHz,  $\text{DMSO-}d_6$ ):  $\delta$  154.0, 150.7, 137.7, 134.3, 133.2, 132.1, 129.0, 128.9, 125.8, 125.1, 124.2, 123.9, 115.6, 115.0, 114.95, 111.9, 29.6. HRMS (ESI,  $m/z$ ) calcd for  $\text{C}_{17}\text{H}_{12}\text{BrN}_3\text{NaO}^+$   $[\text{M}+\text{Na}]^+$ : 376.0056, found 376.0060.

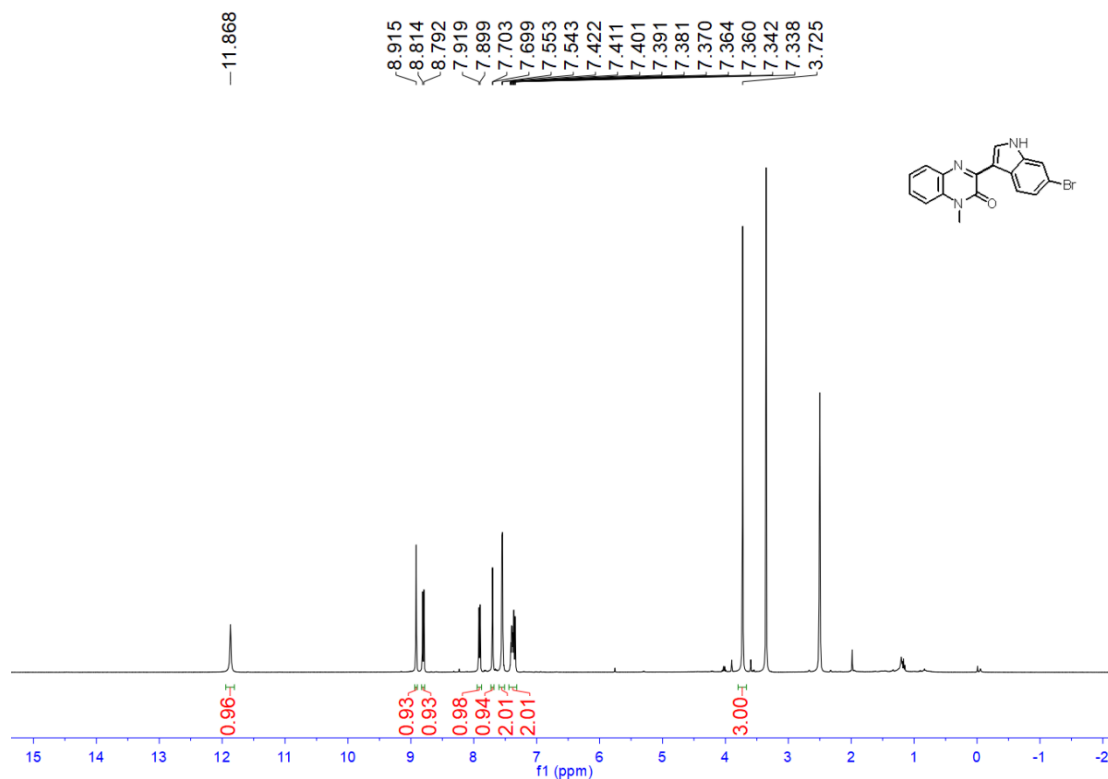



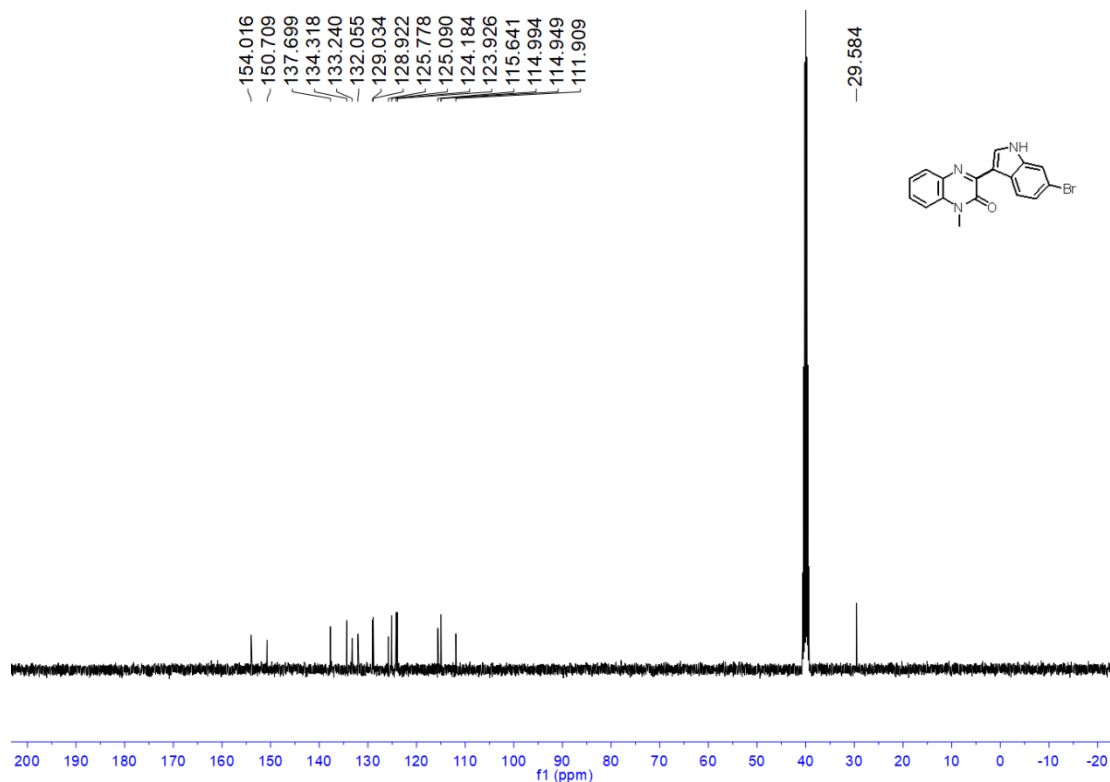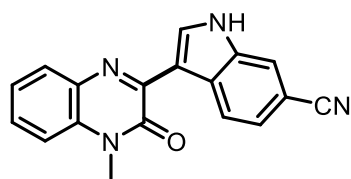

**3-(4-methyl-3-oxo-3,4-dihydroquinoxalin-2-yl)-1H-indole-6-carbonitrile (3aj).** Brown solid, 42.7 mg, yield 71%. m.p.: 321.4-323.7 °C.  $^1\text{H}$  NMR (400 MHz, DMSO- $d_6$ )  $\delta$  12.88 (s, 1H), 9.06 (s, 1H), 8.96 (d,  $J = 8.3$  Hz, 1H), 8.03 (s, 1H), 7.89 (d,  $J = 7.8$  Hz, 1H), 7.60 – 7.49 (m, 3H), 7.42 – 7.34 (m, 1H), 3.70 (s, 3H).  $^{13}\text{C}$  NMR (101 MHz, DMSO- $d_6$ )  $\delta$  154.0, 150.4, 136.6, 135.7, 133.1, 132.1, 129.9, 129.3, 129.0, 124.2, 124.0, 120.8, 117.3, 115.0, 112.1, 104.1, 100.0, 29.7. HRMS (ESI,  $m/z$ ) calcd for  $\text{C}_{18}\text{H}_{12}\text{N}_4\text{NaO}^+$   $[\text{M}+\text{Na}]^+$ : 323.0903, found 323.0903.

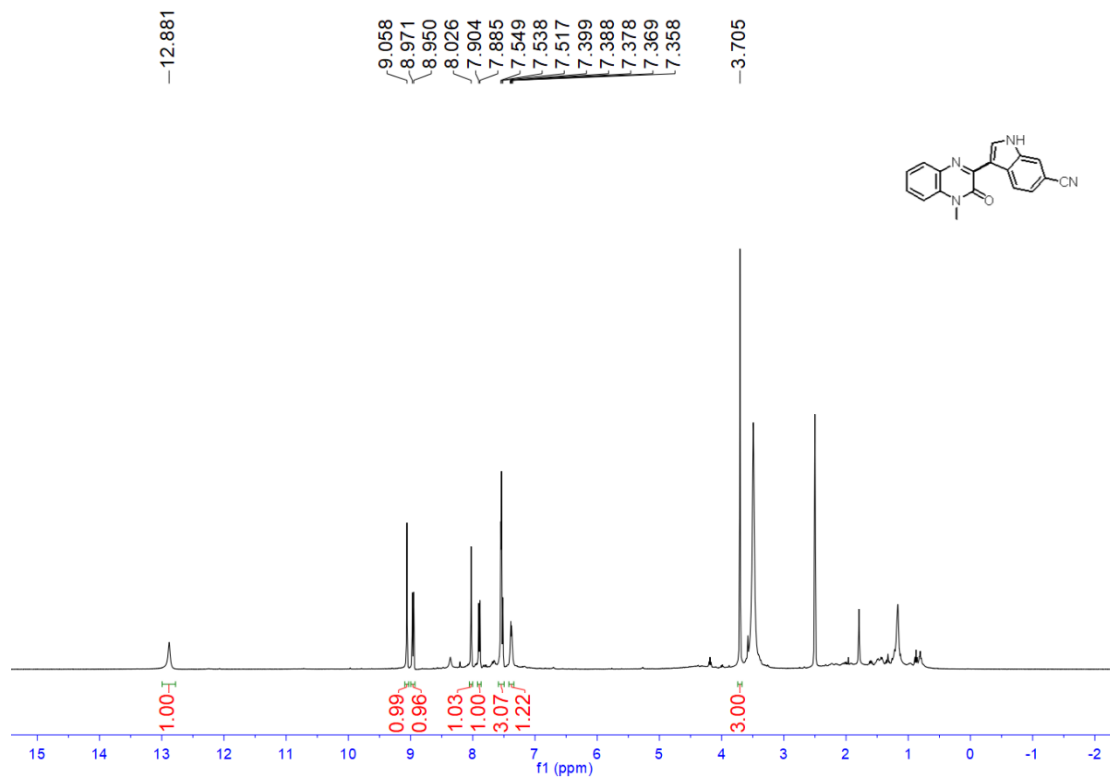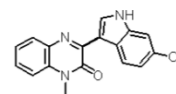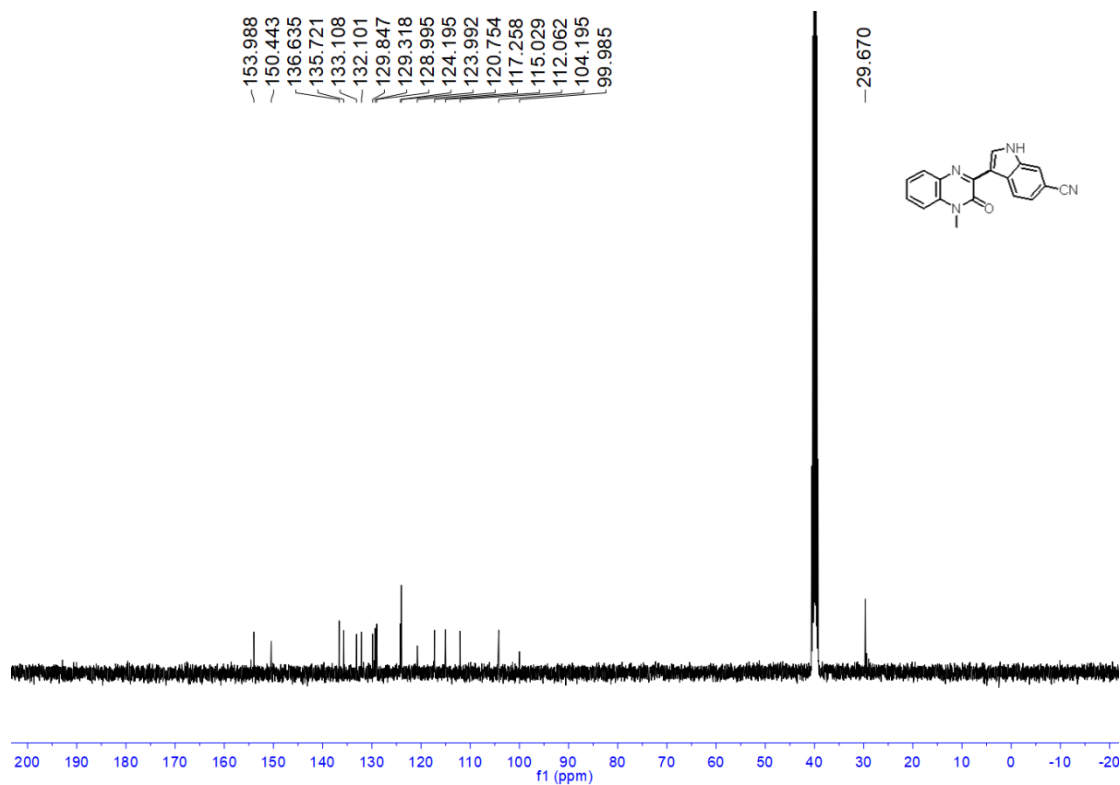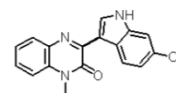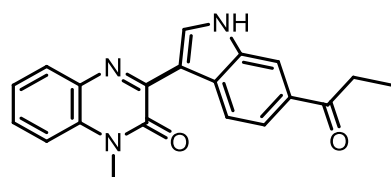

**Methyl 3-(4-methyl-3-oxo-3,4-dihydroquinoxalin-2-yl)-1H-indole-6-carboxylate (3ak).** Yellow solid, 64.6 mg, yield 97%. m.p.: 238.6-

269.6 °C.  $^1\text{H}$  NMR (400 MHz,  $\text{DMSO-}d_6$ )  $\delta$  12.07 (s, 1H), 9.05 (d,  $J = 2.0$  Hz, 1H), 8.89 (d,  $J = 8.5$  Hz, 1H), 8.12 (s, 1H), 7.86 (d,  $J = 7.7$  Hz, 1H), 7.83 – 7.77 (m, 1H), 7.52 – 7.42 (m, 2H), 7.38 – 7.30 (m, 1H), 3.88 (s, 3H), 3.66 (s, 3H).  $^{13}\text{C}$  NMR (101 MHz,  $\text{DMSO-}d_6$ )  $\delta$  167.4, 153.9, 150.6, 136.4, 136.1, 133.2, 132.0, 130.3, 128.9, 123.84, 123.78, 123.1, 121.9, 114.8, 114.1, 112.1, 52.3, 29.5. HRMS (ESI,  $m/z$ ) calcd for  $\text{C}_{19}\text{H}_{16}\text{N}_3\text{O}_3^+$   $[\text{M}+\text{H}]^+$ : 334.1186, found 334.1189.

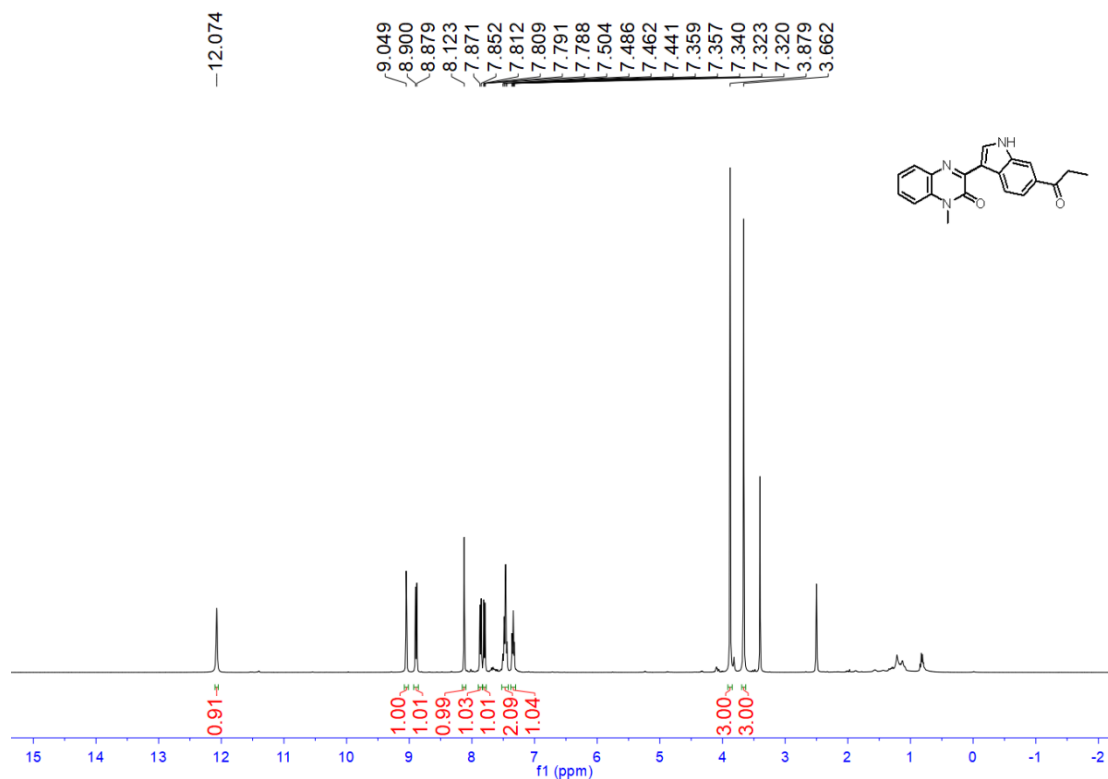

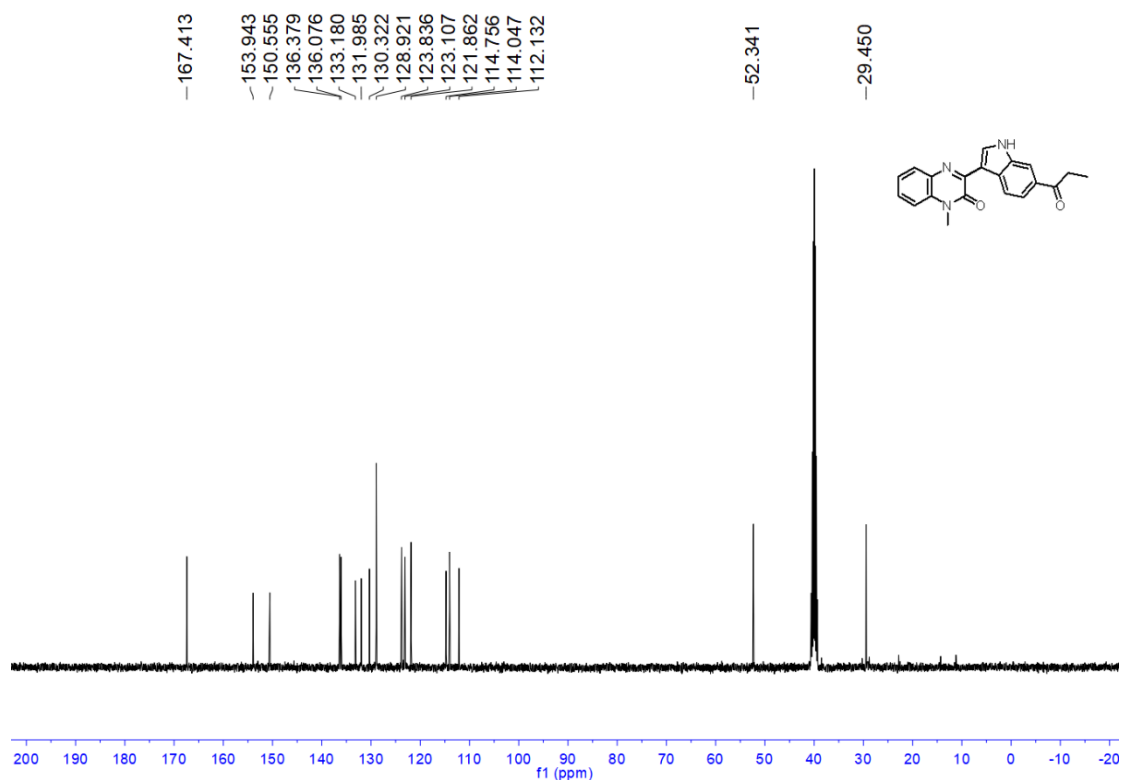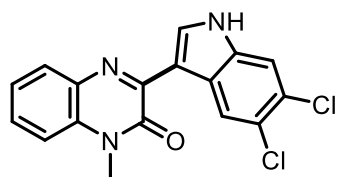

**3-(5,6-dichloro-1H-indol-3-yl)-1-methylquinoxalin-**

**2(1H)-one (3a).** Orange solid, 67.4 mg, yield 98%. m.p.: 256.3-257.6 °C.  $^1\text{H}$  NMR (400 MHz,  $\text{DMSO-}d_6$ )  $\delta$  11.89 (s, 1H), 8.86 (s, 2H), 7.79 – 7.73 (m, 1H), 7.65 (s, 1H), 7.51 – 7.44 (m, 1H), 7.44 – 7.39 (m, 1H), 7.36 – 7.28 (m, 1H), 3.61 (s, 3H).  $^{13}\text{C}$  NMR (101 MHz,  $\text{DMSO-}d_6$ )  $\delta$  153.8, 150.2, 135.6, 135.4, 133.0, 131.9, 129.0, 128.8, 126.5, 125.1, 124.1, 123.8, 123.8, 114.7, 113.8, 111.4, 29.4. HRMS (ESI,  $m/z$ ) calcd for  $\text{C}_{17}\text{H}_{11}\text{Cl}_2\text{N}_3\text{NaO}^+$   $[\text{M}+\text{Na}]^+$ : 366.0171, found 366.0175.

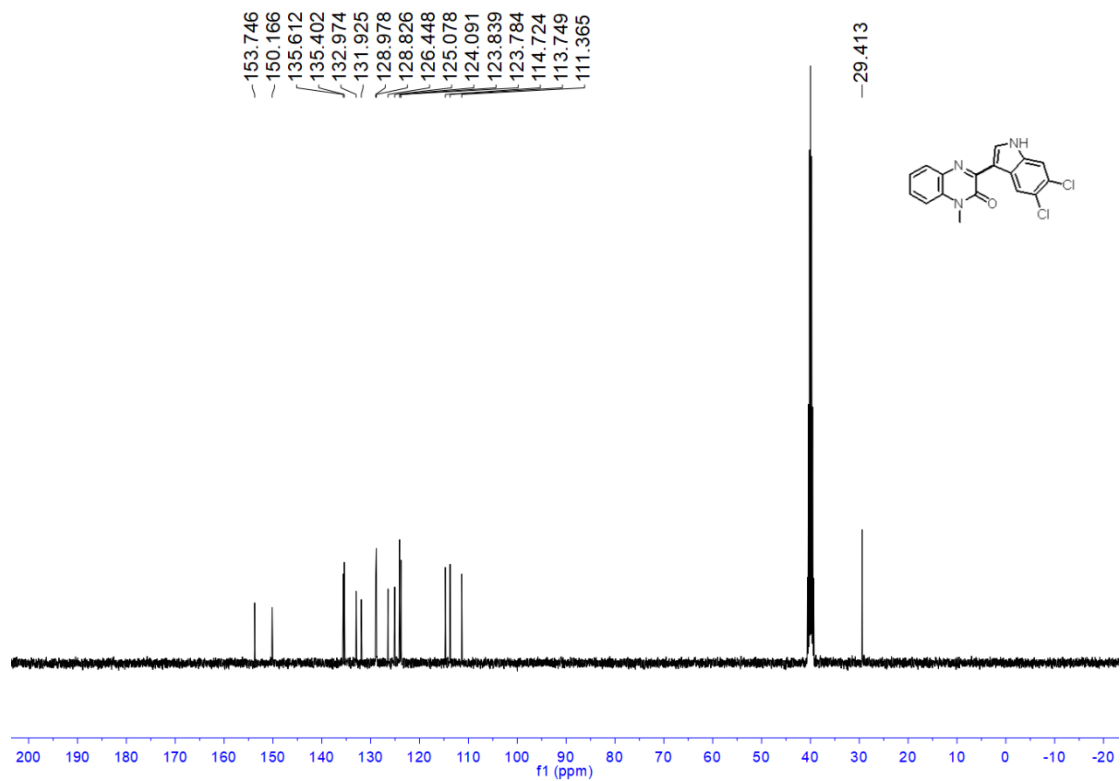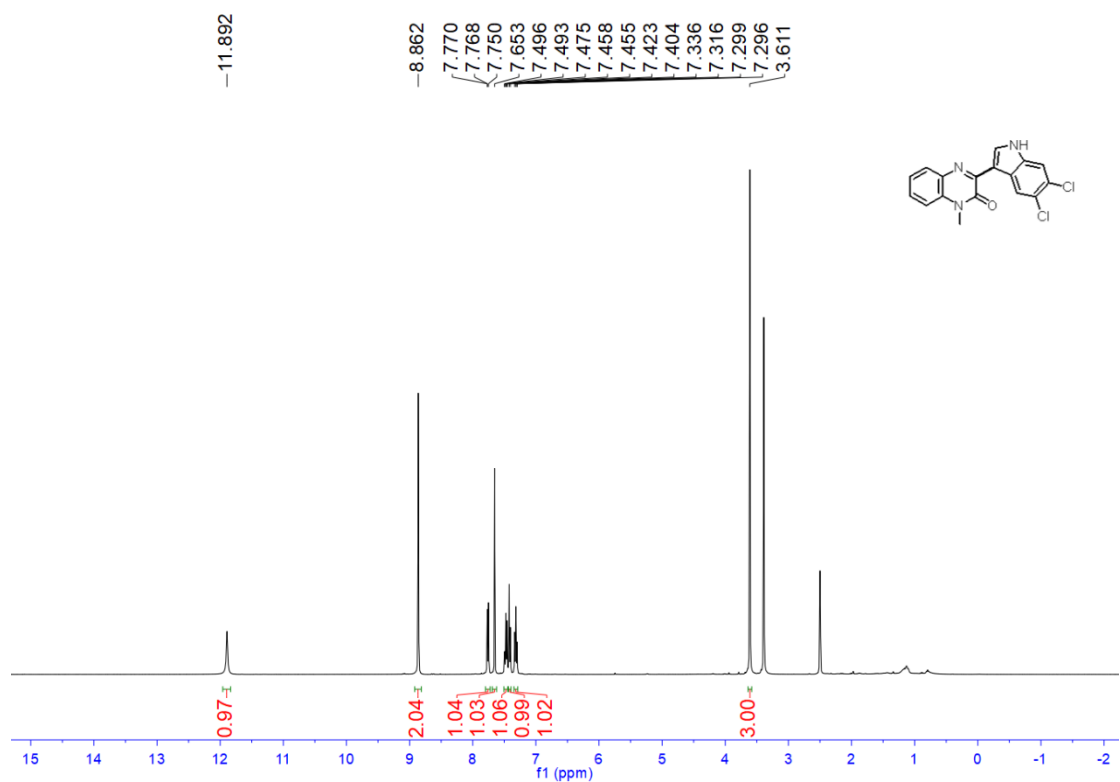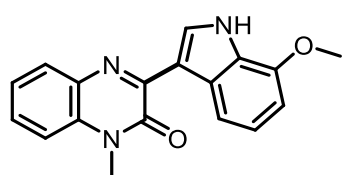

**3-(7-methoxy-1H-indol-3-yl)-1-methylquinoxalin-2(1H)-**

**one (3am).** Yellow solid, 59.9 mg, yield 98%. m.p.: 266.7-267.2 °C. <sup>1</sup>H NMR (400 MHz, DMSO-*d*<sub>6</sub>) δ 11.92 (s, 1H), 8.82 (d, *J* = 2.3 Hz, 1H), 8.47 (d, *J* = 8.0 Hz, 1H), 7.90 (d, *J* = 7.8 Hz, 1H), 7.56 – 7.50 (m, 2H), 7.42 – 7.35 (m, 1H), 7.16 (dd, *J*<sub>1</sub> = *J*<sub>2</sub> = 7.9 Hz, 1H), 6.82 (d, *J* = 7.7 Hz, 1H), 3.96 (s, 3H), 3.72 (s, 3H). <sup>13</sup>C NMR (101 MHz, DMSO-*d*<sub>6</sub>): δ 154.1, 151.1, 146.6, 133.4, 132.9, 132.0, 128.8, 128.7, 128.3, 126.7, 123.9, 122.1, 116.2, 114.9, 112.4, 103.8, 55.7, 29.6. HRMS (ESI, *m/z*) calcd for C<sub>18</sub>H<sub>16</sub>N<sub>3</sub>O<sub>2</sub><sup>+</sup> [M+H]<sup>+</sup>: 306.1237, found 306.1239.

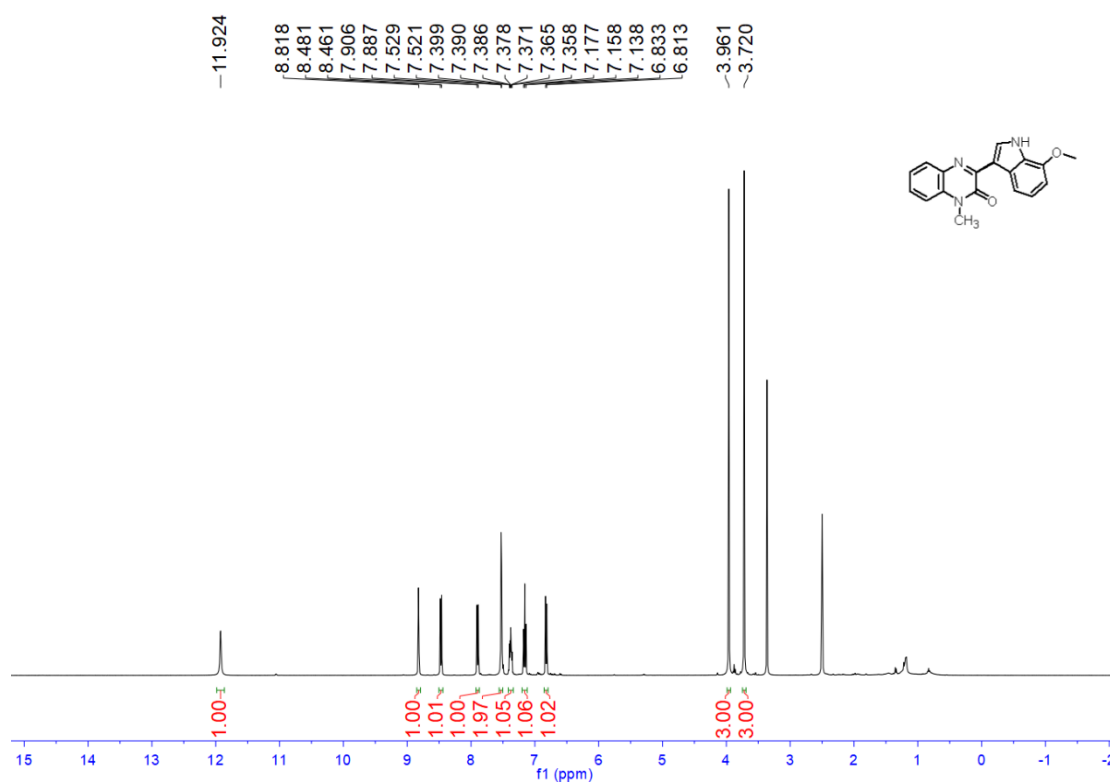

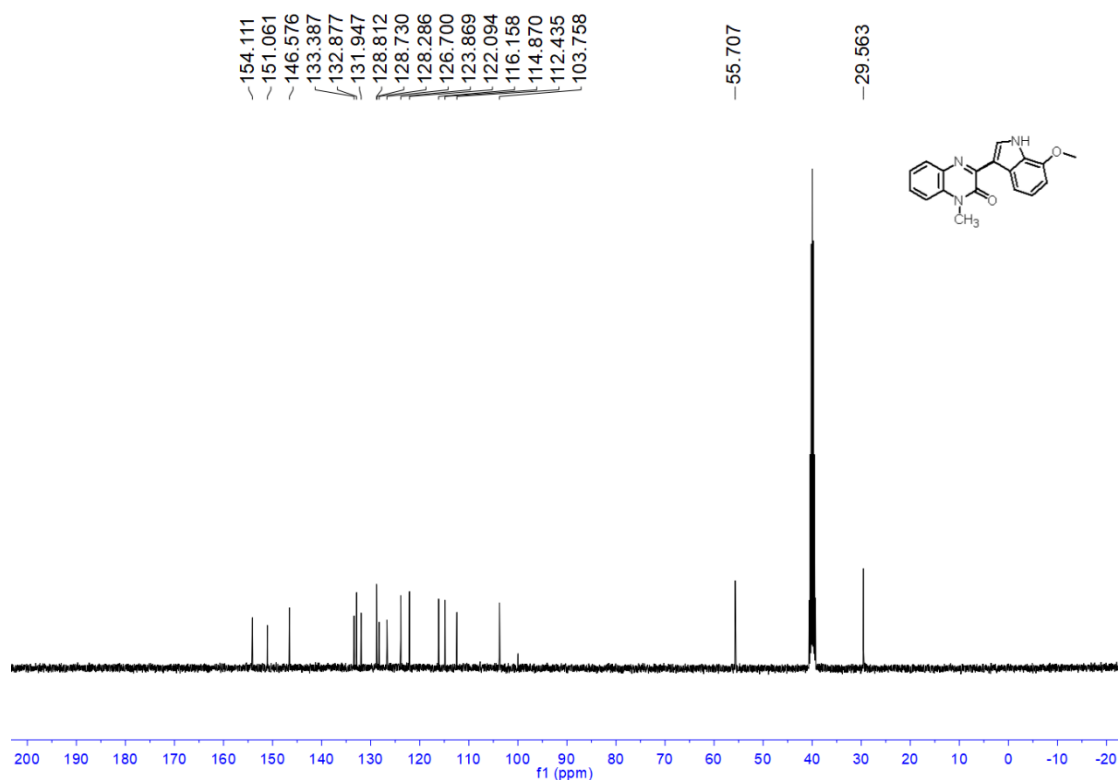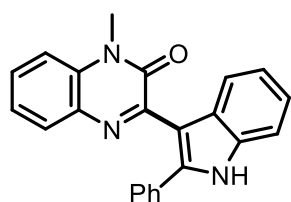

**1-methyl-3-(2-phenyl-1H-indol-3-yl)quinoxalin-**

**2(1H)-one (3an).** Yellow solid, 68.9 mg, yield 98%. m.p.: 210.3-211.4 °C.  $^1\text{H}$  NMR (400 MHz,  $\text{DMSO-}d_6$ )  $\delta$  11.85 (s, 1H), 7.81 – 7.75 (m, 1H), 7.67 (d,  $J = 8.0$  Hz, 1H), 7.65 – 7.59 (m, 1H), 7.59 – 7.45 (m, 4H), 7.42 – 7.28 (m, 4H), 7.23 – 7.15 (m, 1H), 7.11 – 7.04 (m, 1H), 3.59 (s, 3H).  $^{13}\text{C}$  NMR (101 MHz,  $\text{DMSO-}d_6$ )  $\delta$  154.2, 154.0, 139.6, 136.4, 133.6, 133.5, 133.1, 130.2, 129.5, 129.0, 128.8, 128.3, 128.2, 123.8, 122.5, 120.8, 120.4, 115.0, 111.9, 109.6, 29.7. HRMS (ESI,  $m/z$ ) calcd for  $\text{C}_{23}\text{H}_{18}\text{N}_3\text{O}^+$   $[\text{M}+\text{H}]^+$ : 352.1444, found 352.1447.

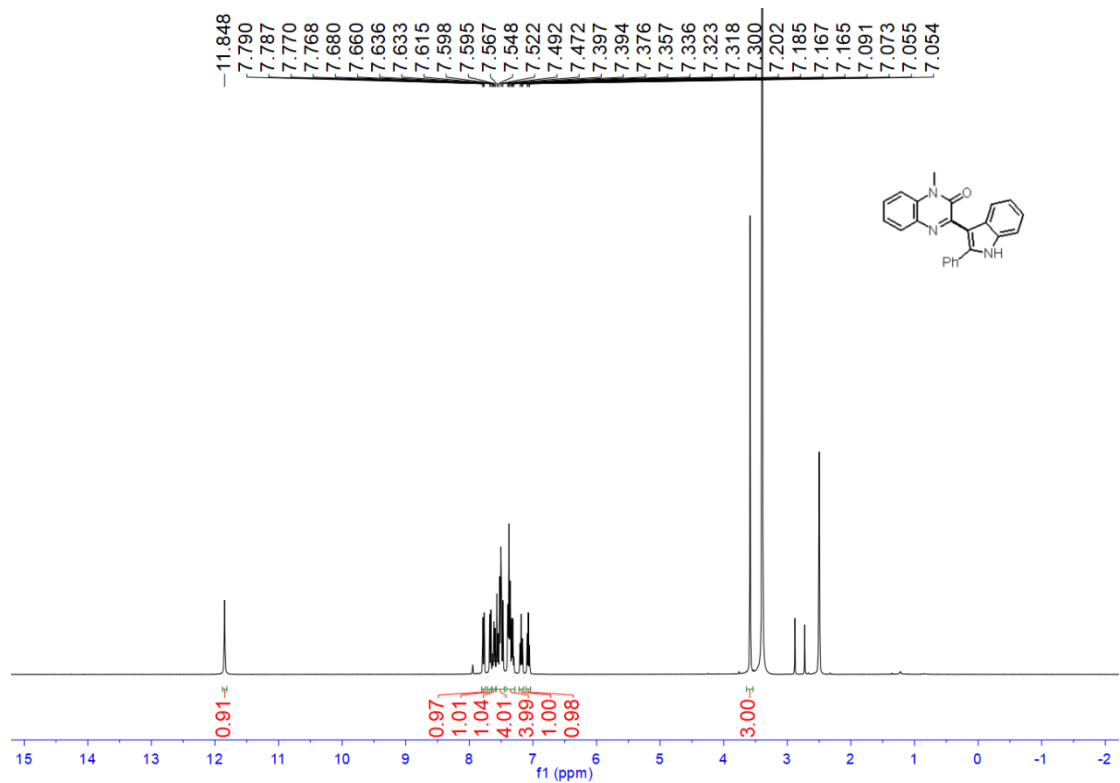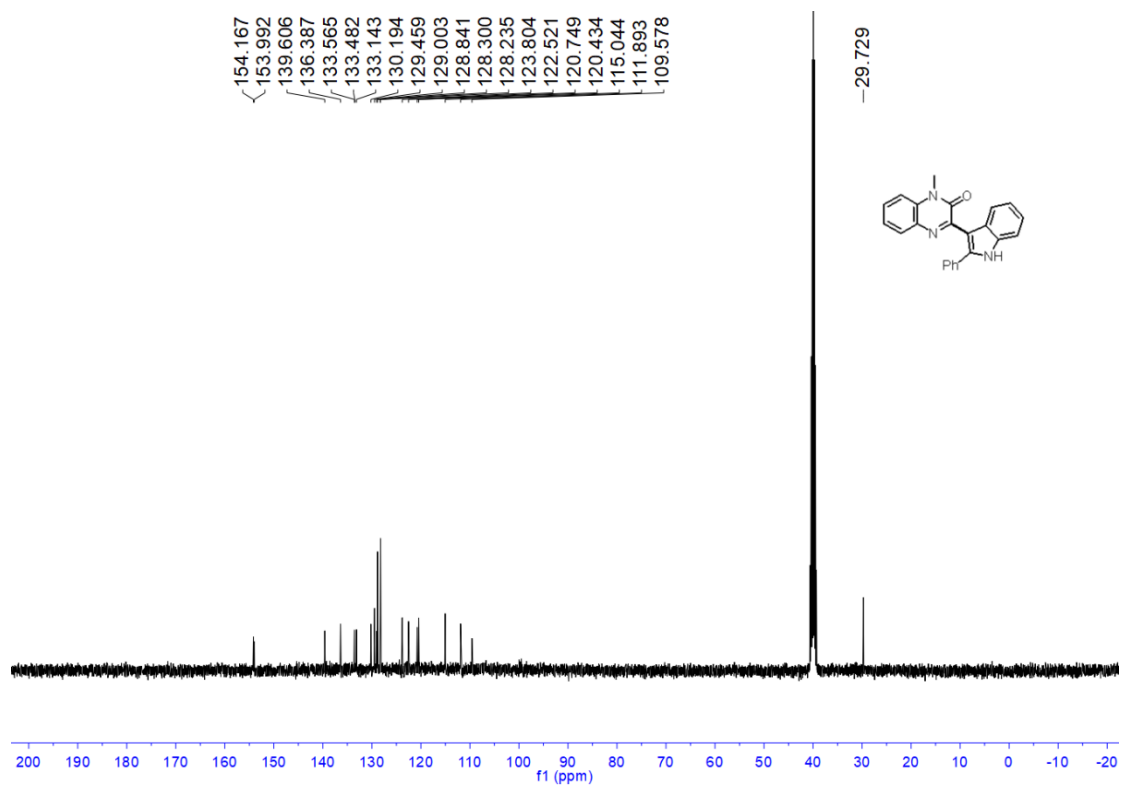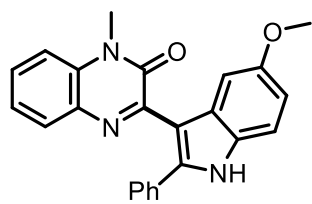

**3-(5-methoxy-2-phenyl-1H-indol-3-yl)-1-**



**methylquinoxalin-2(1*H*)-one (3ao).** Yellow solid, 65.9 mg, yield 86%. m.p.: 146.4-147.3 °C. <sup>1</sup>H NMR (400 MHz, CDCl<sub>3</sub>, TMS) δ 9.76 (s, 1H), 7.88 – 7.82 (m, H), 7.55 – 7.47 (m, 1H), 7.44 – 7.38 (m, 1H), 7.34 – 7.27 (m, 2H), 7.19 – 7.10 (m, 3H), 6.85 (dd, *J*<sub>1</sub> = *J*<sub>2</sub> = 7.7 Hz, 2H), 6.78 – 6.68 (m, 2H), 3.86 (s, 3H), 3.58 (s, 3H). <sup>13</sup>C NMR (101 MHz, CDCl<sub>3</sub>, TMS) δ 155.2, 154.4, 154.3, 141.0, 133.6, 133.5, 133.1, 131.6, 129.6, 129.4, 128.6, 127.8, 127.6, 123.7, 113.6, 112.9, 112.8, 109.0, 101.9, 56.0, 29.5. HRMS (ESI, *m/z*) calcd for C<sub>24</sub>H<sub>20</sub>N<sub>3</sub>O<sub>2</sub><sup>+</sup> [M+H]<sup>+</sup>: 382.1550, found 382.1553.

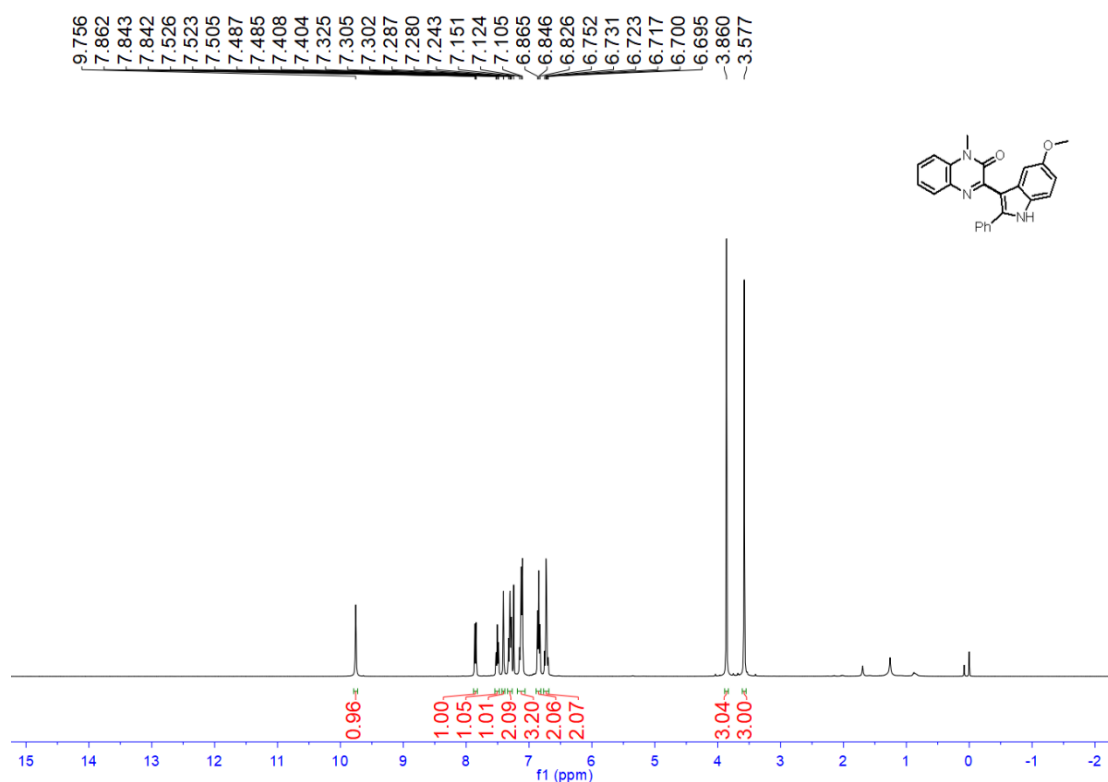

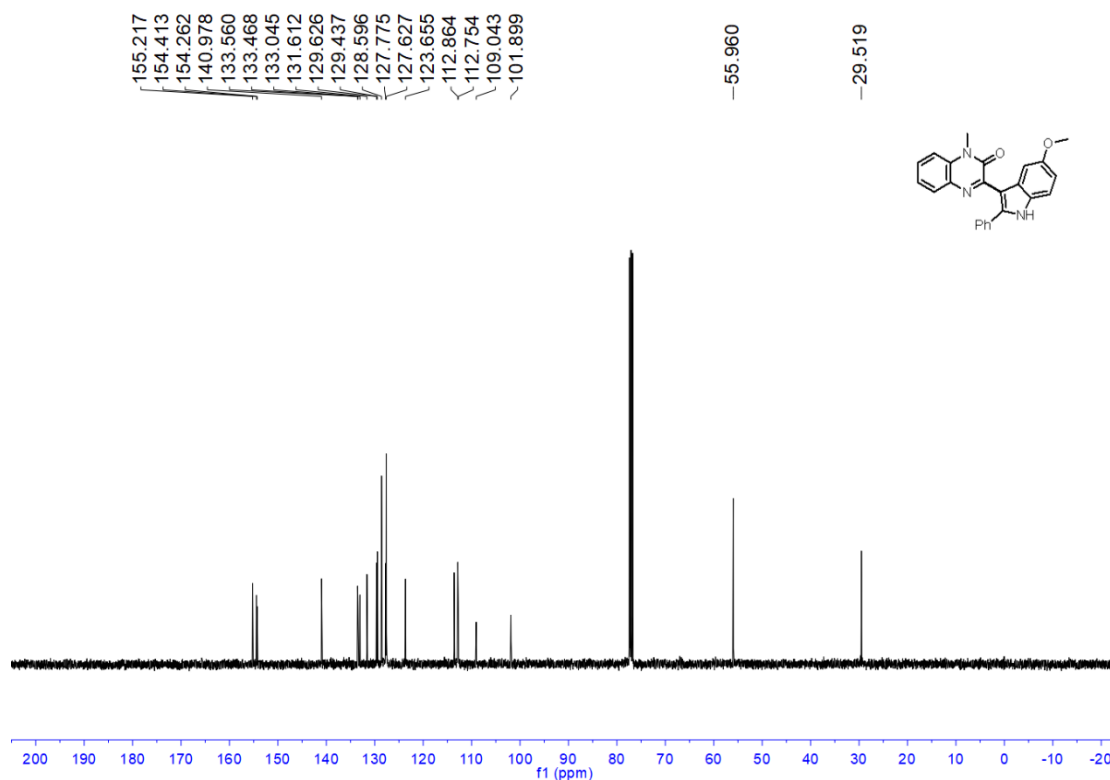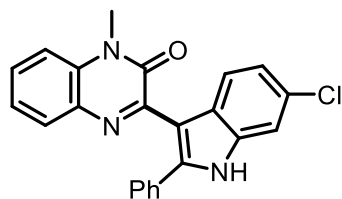

**3-(6-chloro-2-phenyl-1*H*-indol-3-yl)-1-methylquinoxalin-2(1*H*)-one (3ap).** Yellow solid, 61.0 mg, yield 79%. m.p.: 246.6-247.8 °C. <sup>1</sup>H NMR (400 MHz, DMSO-*d*<sub>6</sub>) δ 12.01 (s, 1H), 7.81 – 7.74 (m, 1H), 7.67 (d, *J* = 8.5 Hz, 1H), 7.65 – 7.59 (m, 1H), 7.59-7.54(m, 1H), 7.54 – 7.49 (m, 2H), 7.48 (d, *J* = 1.5 Hz, 2H), 7.43 – 7.31 (m, 4H), 7.10 (dd, *J* = 8.6, 1.7 Hz, 1H), 3.59 (s, 3H). <sup>13</sup>C NMR (101 MHz, DMSO-*d*<sub>6</sub>) δ 154.1, 153.4, 140.5, 136.8, 133.6, 133.1, 130.4, 129.5, 128.9, 128.6, 128.3, 127.8, 127.0, 123.8, 122.3, 120.8, 115.1, 111.4, 109.7, 100.0, 29.8. HRMS (ESI, *m/z*) calcd for C<sub>23</sub>H<sub>17</sub>ClN<sub>3</sub>NaO<sup>+</sup> [M+Na]<sup>+</sup>: 408.0874, found 408.0876.

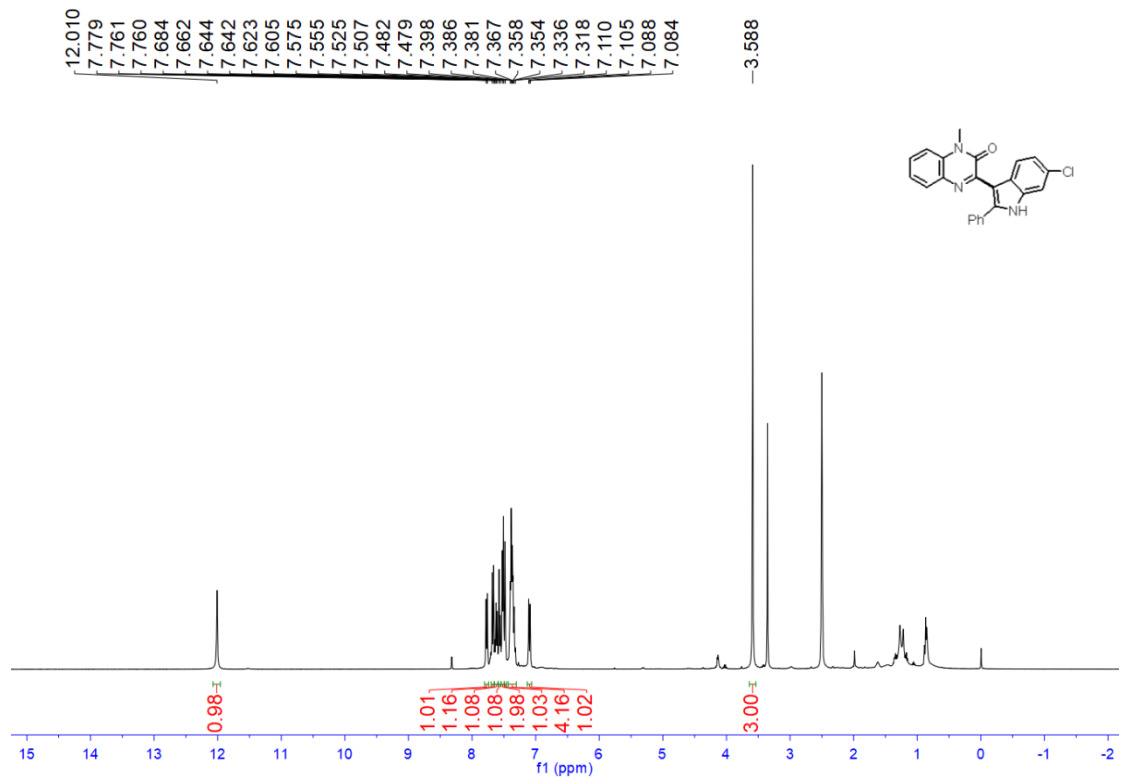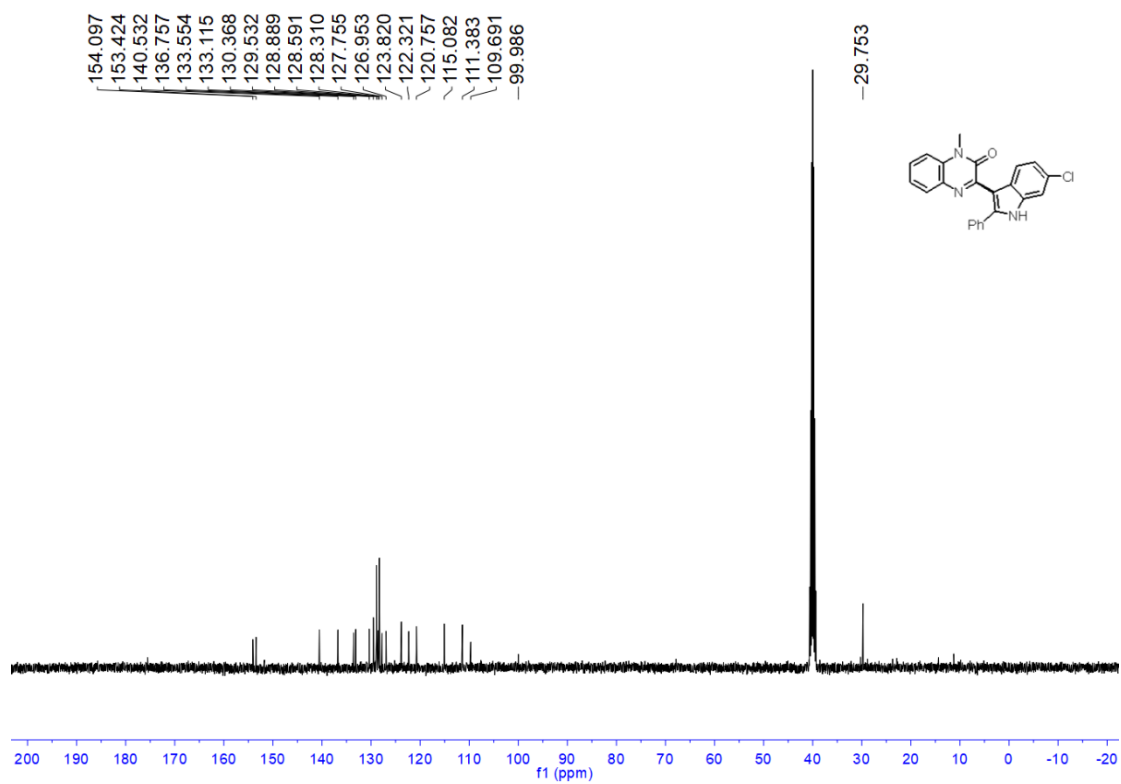

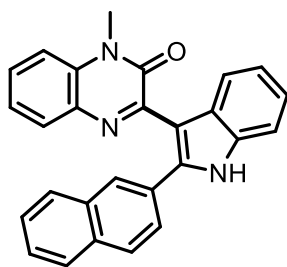

**1-methyl-3-(2-(naphthalen-2-yl)-1H-indol-3-yl)quinoxalin-2(1H)-one (3aq).** Yellow solid, 78.3 mg, yield 98%, m.p.: 193.3-194.6°C.  $^1\text{H}$  NMR (400 MHz, DMSO- $d_6$ )  $\delta$  12.02 (s, 1H), 8.19 (s, 1H), 7.98 – 7.74 (m, 5H), 7.65 – 7.48 (m, 6H), 7.42 – 7.34 (m, 1H), 7.22 (dd,  $J_1 = J_2 = 7.2$  Hz, 1H), 7.11 (dd,  $J_1 = J_2 = 7.4$  Hz, 1H), 3.55 (s, 3H).  $^{13}\text{C}$  NMR (101 MHz, DMSO- $d_6$ )  $\delta$  154.2, 153.9, 139.8, 136.6, 133.5, 133.3, 133.2, 132.8, 131.3, 130.2, 129.5, 129.1, 128.6, 128.1, 128.0, 127.0, 126.9, 126.8, 126.7, 123.8, 122.7, 121.0, 120.6, 115.0, 112.0, 110.0, 29.7. HRMS (ESI,  $m/z$ ) calcd for  $\text{C}_{27}\text{H}_{20}\text{N}_3\text{O}^+$   $[\text{M}+\text{H}]^+$ : 402.1601, found 402.1602.

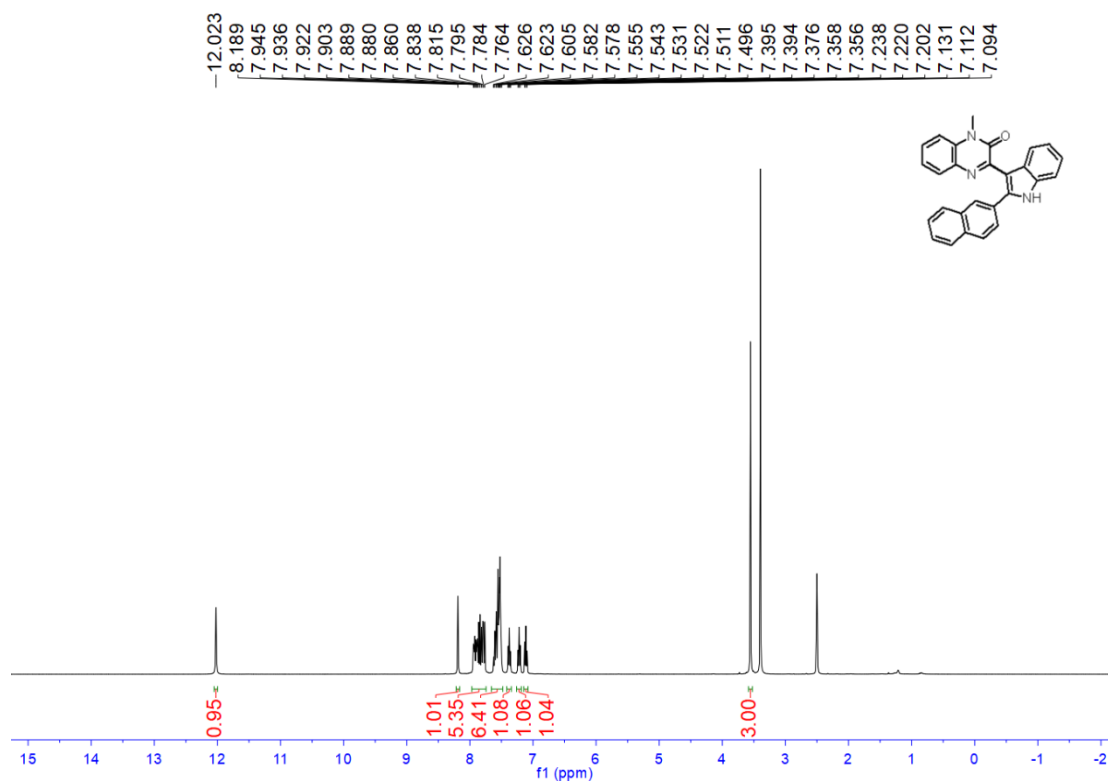

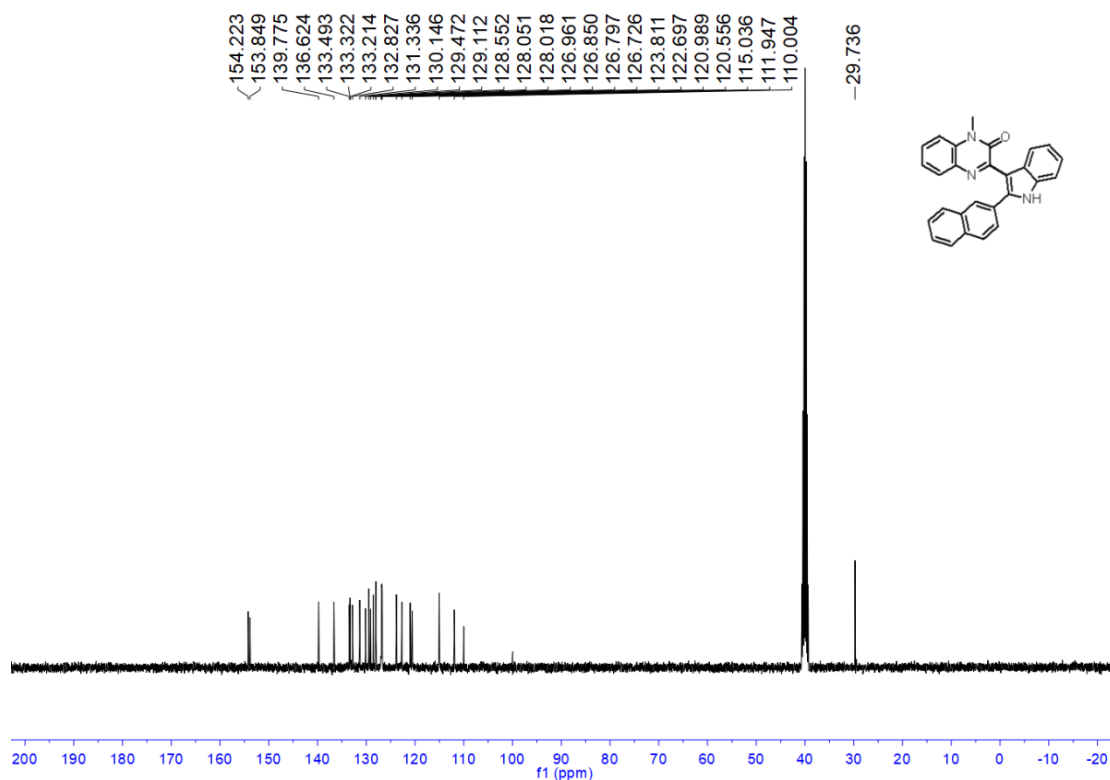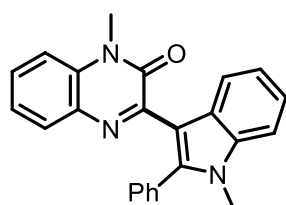

**1-methyl-3-(1-methyl-2-phenyl-1H-indol-3-**

**yl)quinoxalin-2(1H)-one (3ar).** Orange solid, 60.3 mg, yield 82%. m.p.: 221.5-222.7 °C. <sup>1</sup>H NMR (400 MHz, CDCl<sub>3</sub>, TMS) δ 7.92 (d, *J* = 7.8 Hz, 1H), 7.79 (d, *J* = 7.8 Hz, 1H), 7.51-7.43(m, 3H), 7.43 – 7.35 (m, 4H), 7.30 (t, *J* = 7.5 Hz, 2H), 7.5 – 7.20 (m, 2H), 3.72 (s, 3H), 3.57 (s, 3H). <sup>13</sup>C NMR (101 MHz, CDCl<sub>3</sub>, TMS) δ 154.3, 153.6, 142.6, 137.6, 133.4, 133.1, 132.5, 130.5, 129.7, 129.2, 128.1, 128.2, 127.5, 123.3, 122.5, 121.1, 120.9, 113.4, 111.0, 109.7, 31.2, 29.3. HRMS (ESI, *m/z*) calcd for C<sub>24</sub>H<sub>20</sub>N<sub>3</sub>O<sup>+</sup> [M+H]<sup>+</sup>: 366.1601, found 366.1605.

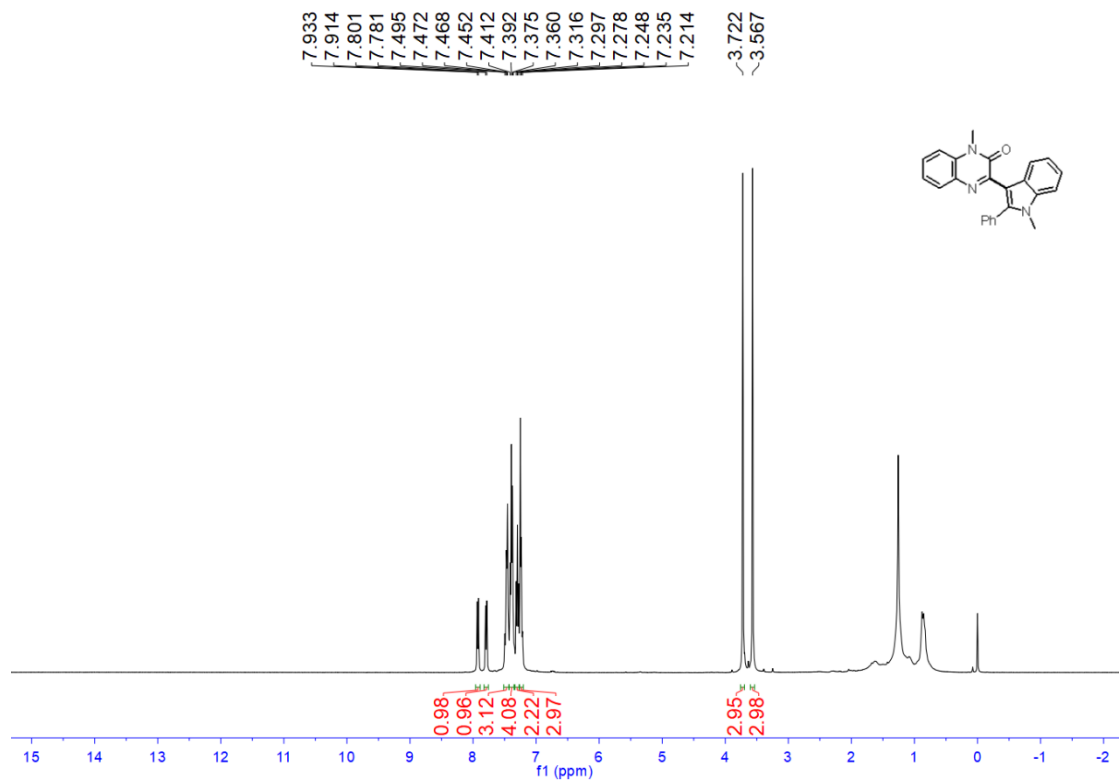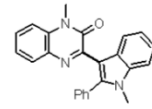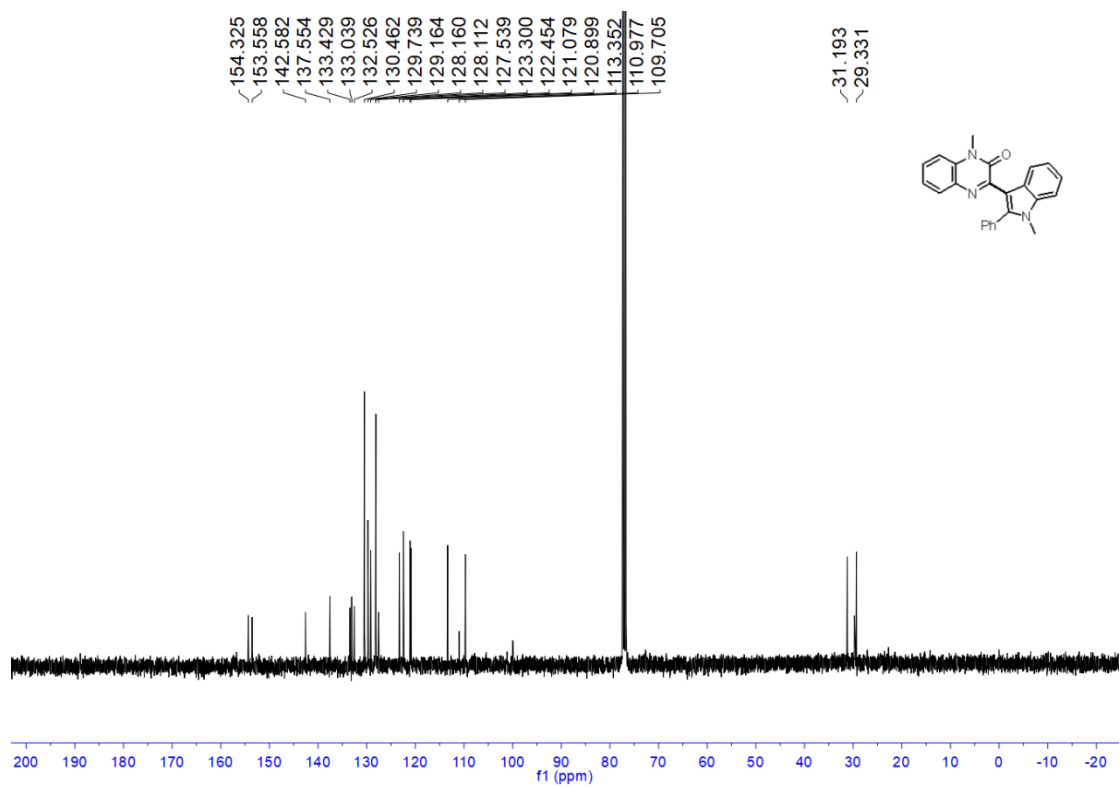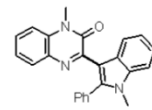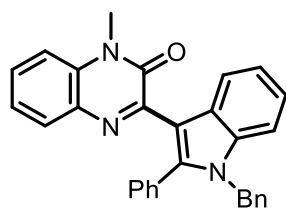

**3-(1-benzyl-2-phenyl-1H-indol-3-yl)-1-**

**methylquinoxalin-2(1*H*)-one (3as).** Yellow solid, 83.7 mg, yield 95%, m.p.: 244.2-245.1 °C. <sup>1</sup>H NMR (400 MHz, CDCl<sub>3</sub>, TMS) δ 7.97 (d, *J* = 7.4 Hz, 1H), 7.82 (d, *J* = 7.7 Hz, 1H), 7.47 (t, *J* = 7.5 Hz, 1H), 7.42 – 7.36 (m, 3H), 7.29 (d, *J* = 9.0 Hz, 4H), 7.27 – 7.16 (m, 9H), 7.04 (d, *J* = 6.8 Hz, 2H), 5.35 (s, 2H), 3.55 (s, 2H). <sup>13</sup>C NMR (101 MHz, CDCl<sub>3</sub>, TMS) δ 154.2, 153.5, 143.0, 137.6, 137.1, 133.4, 133.1, 132.5, 130.3, 129.8, 129.3, 128.7, 128.3, 128.1, 127.9, 127.3, 126.3, 123.3, 122.7, 121.3, 121.0, 113.4, 111.5, 110.7, 47.9, 29.3. HRMS (ESI, *m/z*) calcd for C<sub>30</sub>H<sub>24</sub>N<sub>3</sub>O<sup>+</sup> [M+H]<sup>+</sup>: 442.1914, found 442.1915.

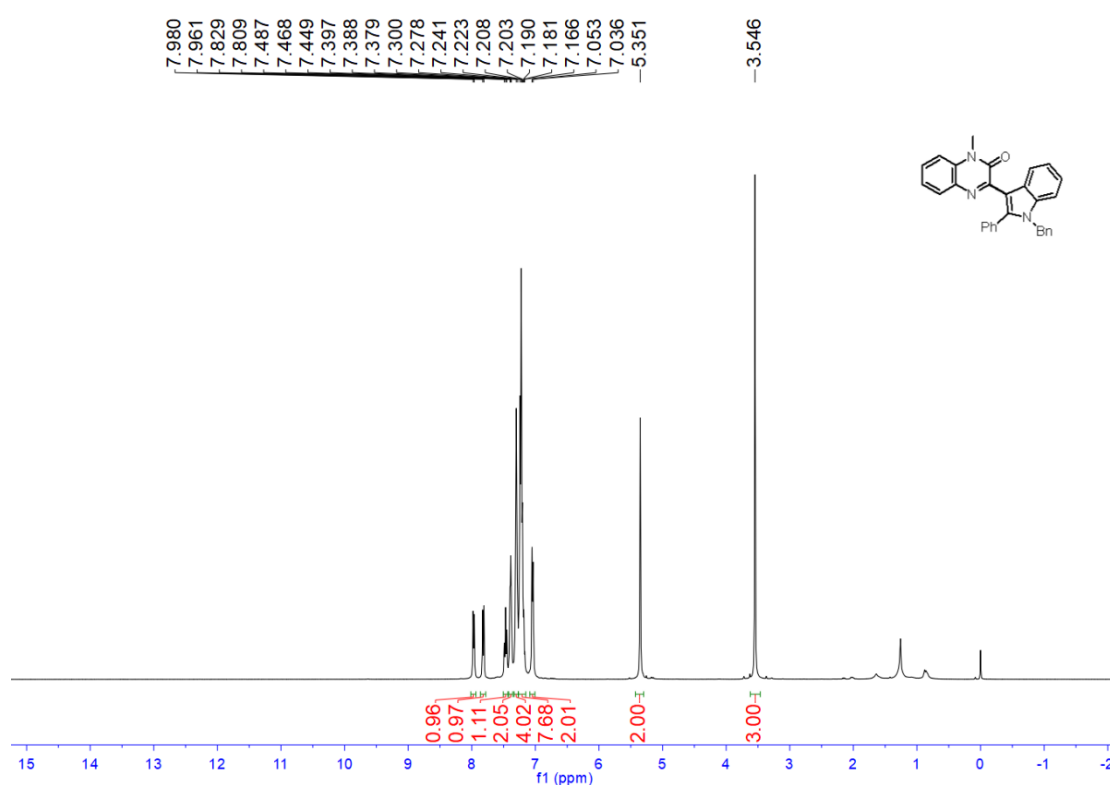

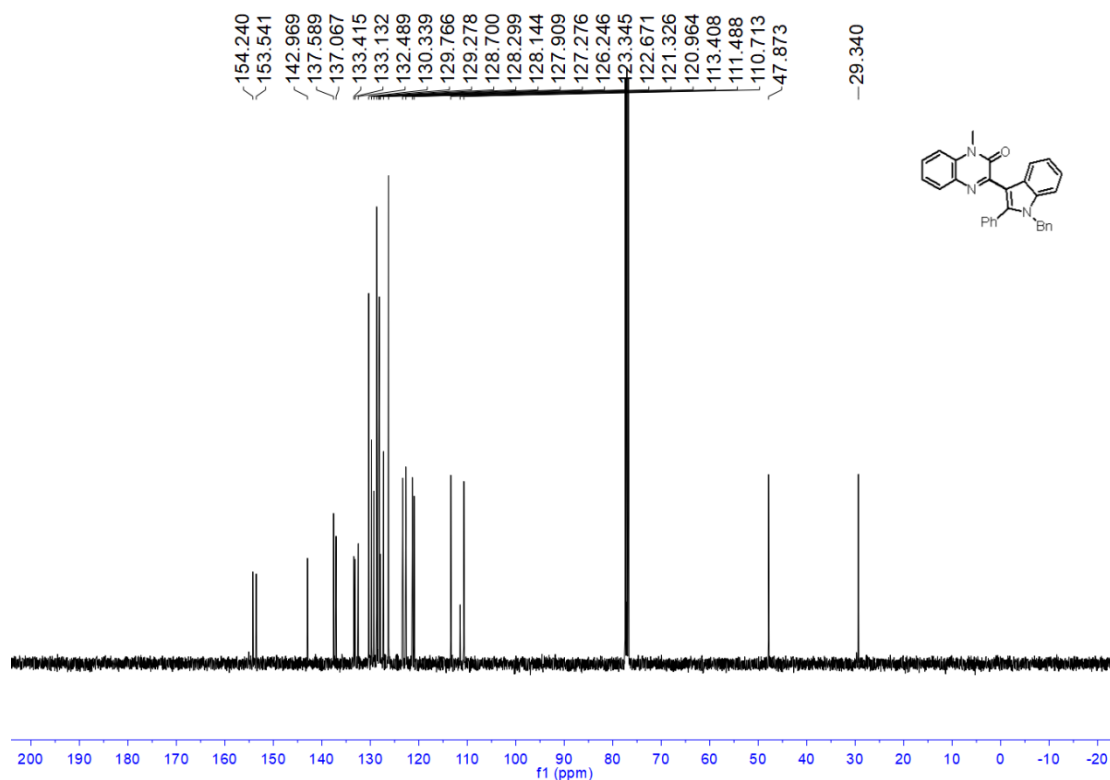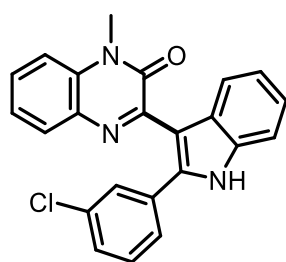

### 3-(2-(3-chlorophenyl)-1H-indol-3-yl)-1-

**methylquinoxalin-2(1H)-one (3at).** Yellow solid, 64.1 mg, yield 83%. m.p.: 270.0-271.9 °C. <sup>1</sup>H NMR (400 MHz, DMSO-*d*<sub>6</sub>) δ 11.97 (s, 1H), 7.80 (d, *J* = 7.4 Hz, 1H), 7.72 (d, *J* = 8.0 Hz, 1H), 7.67 – 7.54 (m, 3H), 7.49 (d, *J* = 8.1 Hz, 1H), 7.44 – 7.32 (m, 4H), 7.21 (t, *J* = 7.5 Hz, 1H), 7.09 (t, *J* = 7.5 Hz, 1H), 3.59 (s, 3H). <sup>13</sup>C NMR (101 MHz, DMSO-*d*<sub>6</sub>) δ 154.1, 153.5, 138.0, 136.5, 135.7, 133.5, 133.1, 130.6, 130.3, 129.5, 128.8, 128.0, 127.6, 127.4, 123.9, 123.0, 121.1, 120.7, 115.1, 112.0, 110.3, 29.8. HRMS (ESI, *m/z*) calcd for C<sub>23</sub>H<sub>16</sub>ClN<sub>3</sub>NaO<sup>+</sup> [M+Na]<sup>+</sup>: 408.0874, found 408.0876.



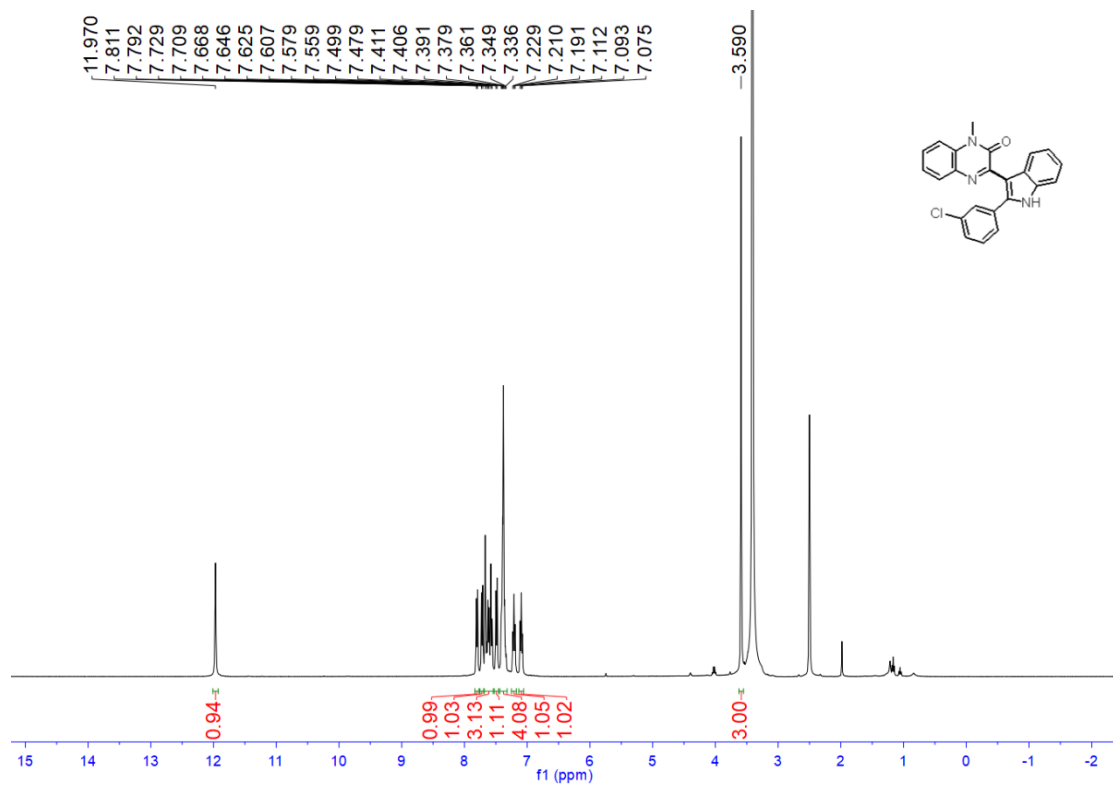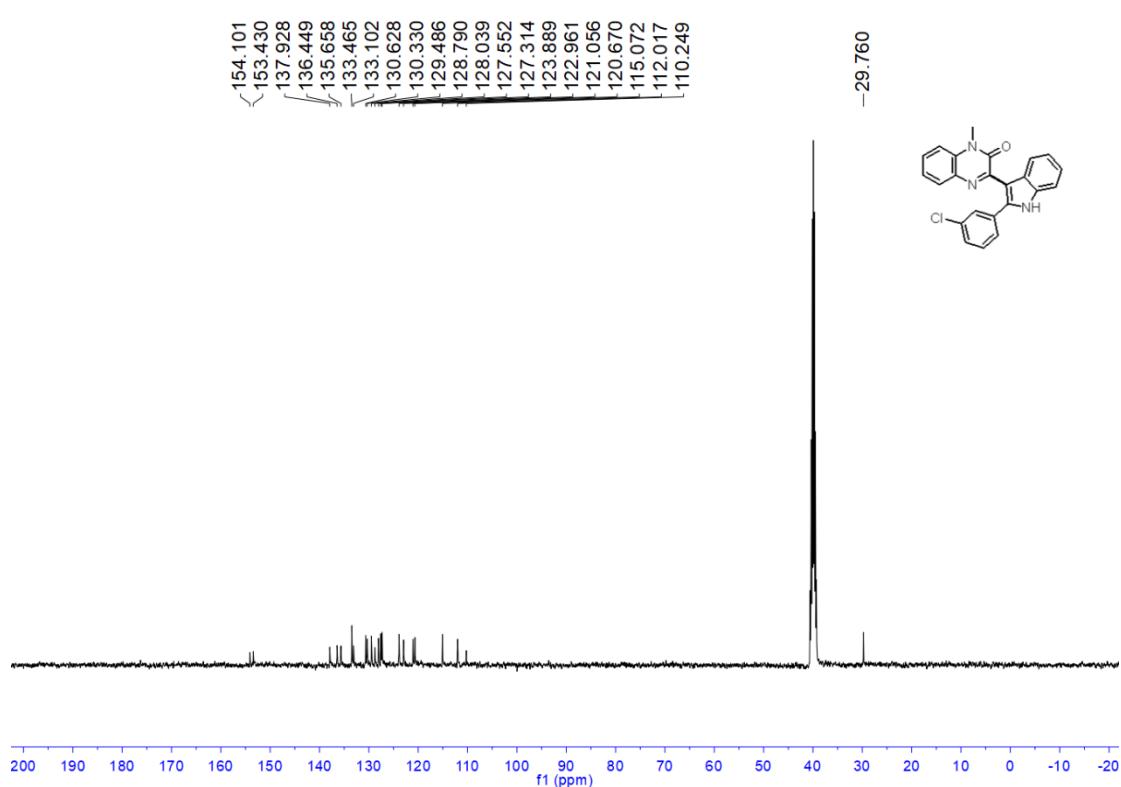

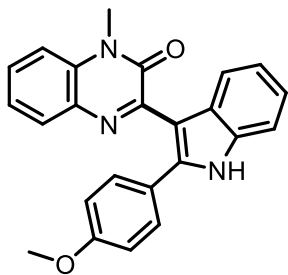

**3-(2-(4-methoxyphenyl)-1H-indol-3-yl)-1-methylquinoxalin-2(1H)-one (3au).** Yellow solid, 68.7 mg, yield 90%. m.p.: 218.4-218.7 °C.  $^1\text{H}$  NMR (400 MHz,  $\text{CDCl}_3$ , TMS)  $\delta$  10.21 (s, 1H), 7.88 (d,  $J = 8.0$  Hz, 1H), 7.82 (d,  $J = 7.8$  Hz, 1H), 7.55 – 7.47 (m, 1H), 7.35 – 7.26 (m, 2H), 7.14 (dd,  $J_1 = J_2 = 7.5$  Hz, 1H), 7.04 – 6.95 (m, 3H), 6.77 (d,  $J = 8.1$  Hz, 1H), 6.16 (d,  $J = 8.5$  Hz, 2H), 3.63 (s, 3H), 3.58 (s, 3H).  $^{13}\text{C}$  NMR (101 MHz,  $\text{CDCl}_3$ , TMS)  $\delta$  159.2, 154.6, 154.4, 140.4, 136.4, 133.6, 133.0, 129.6, 129.5, 129.1, 129.1, 125.7, 123.7, 121.9, 120.7, 119.9, 114.0, 113.6, 112.1, 108.4, 55.2, 29.6. HRMS (ESI,  $m/z$ ) calcd for  $\text{C}_{24}\text{H}_{20}\text{N}_3\text{O}_2^+$   $[\text{M}+\text{H}]^+$ : 382.1550, found 382.1552.

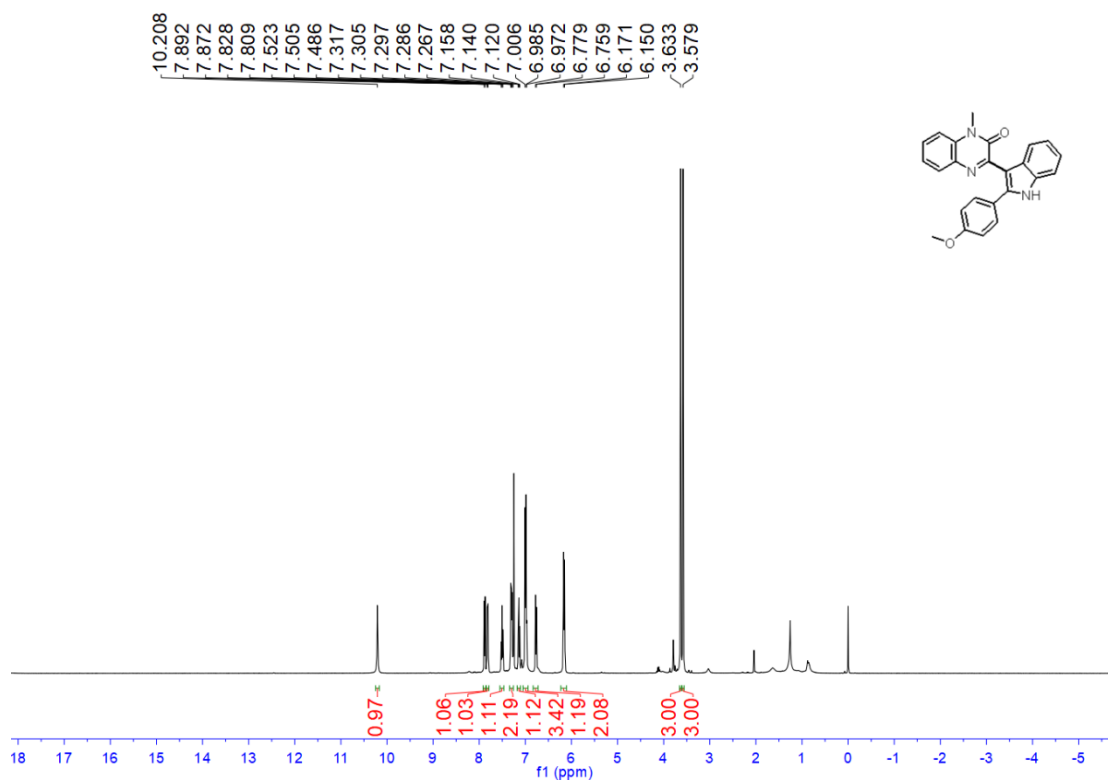

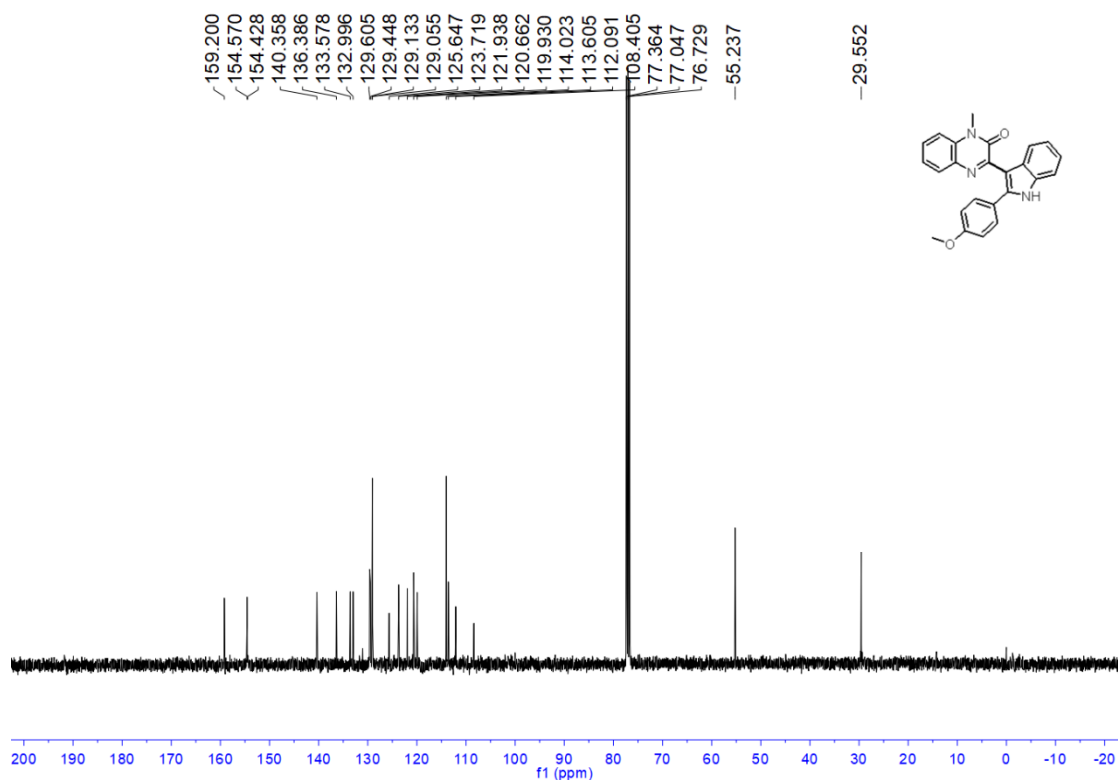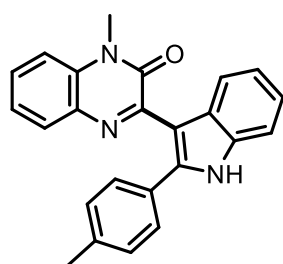

**1-methyl-3-(2-(*p*-tolyl)-1*H*-indol-3-yl)quinoxalin-**

**2(1*H*)-one (3av).** Yellow solid, 65.1 mg, yield 89%. m.p.: 198.7-199.2 °C. <sup>1</sup>H NMR (400 MHz, CDCl<sub>3</sub>, TMS) δ 9.78 (br, 1H), 7.86 (dd,  $J_1 = J_2 = 7.8$  Hz, 2H), 7.50 (dd,  $J_1 = J_2 = 7.5$  Hz, 1H), 7.34 – 7.26 (m, 2H), 7.17 (dd,  $J_1 = J_2 = 7.5$  Hz, 1H), 7.0 – 6.99 (m, 3H), 6.84 (d,  $J = 8.0$  Hz, 1H), 6.58 (d,  $J = 7.7$  Hz, 2H), 3.61 (s, 3H), 2.22 (s, 3H). <sup>13</sup>C NMR (101 MHz, CDCl<sub>3</sub>, TMS) δ 154.5, 154.3, 140.4, 137.6, 136.3, 133.6, 133.1, 130.4, 129.7, 129.43, 129.37, 129.1, 127.6, 123.6, 122.2, 120.8, 120.1, 113.6, 111.8, 108.9, 29.5, 21.2. HRMS (ESI,  $m/z$ ) calcd for C<sub>24</sub>H<sub>20</sub>N<sub>3</sub>O<sup>+</sup> [M+H]<sup>+</sup>: 366.1601, found 366.1604.

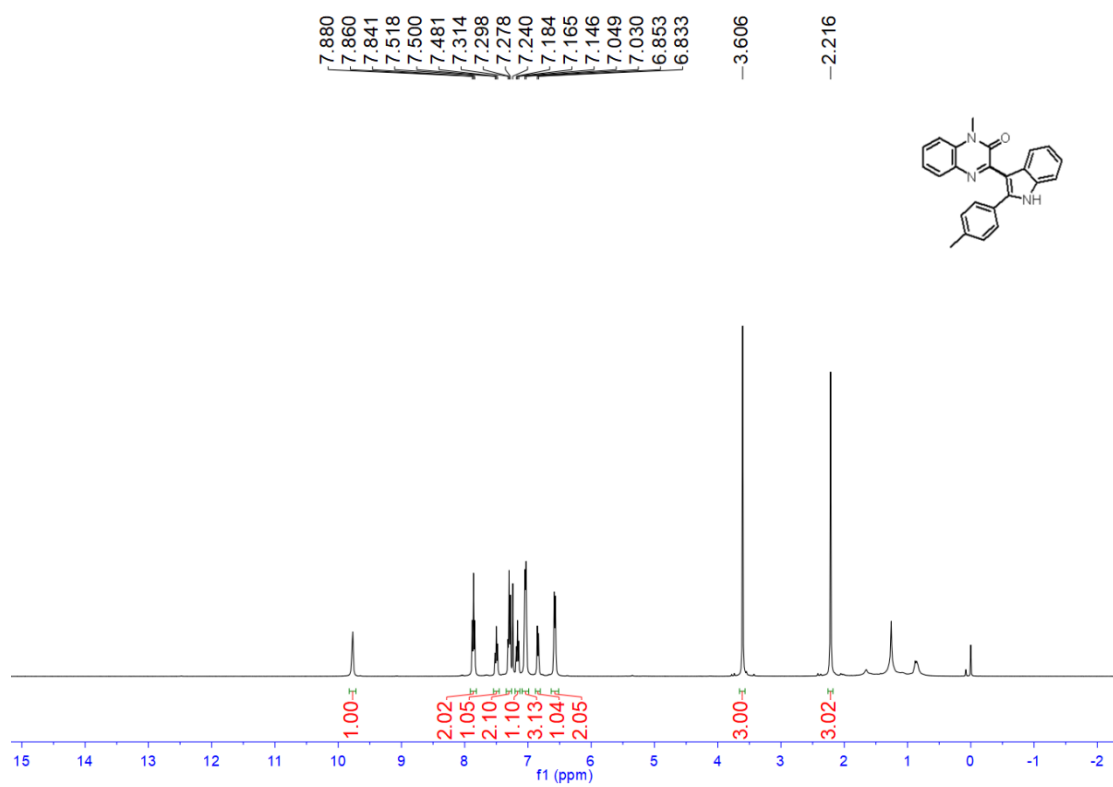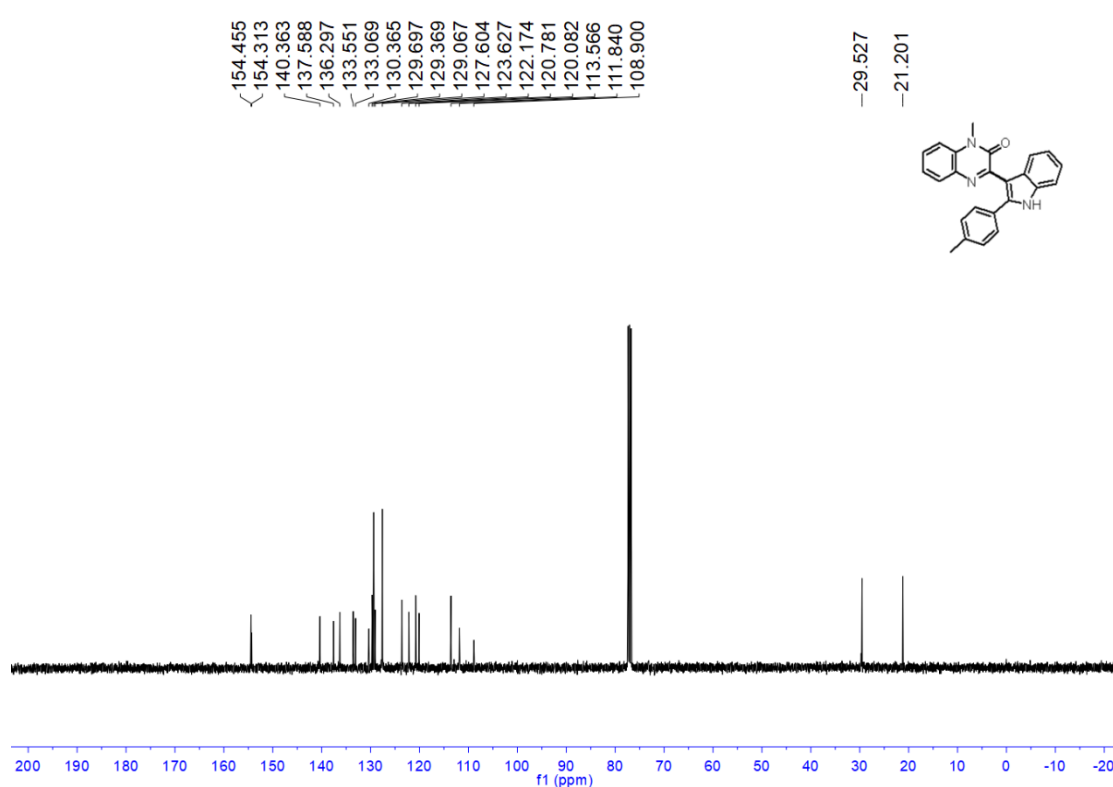

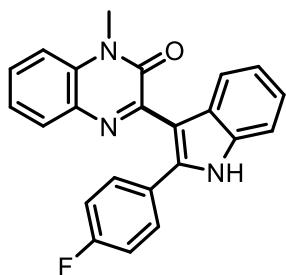

**3-(2-(4-fluorophenyl)-1H-indol-3-yl)-1-methylquinoxalin-2(1H)-one (3aw).** Yellow solid, 69.4 mg, yield 94%. m.p.: 218.8-220.4 °C.  $^1\text{H}$  NMR (400 MHz,  $\text{CDCl}_3$ , TMS)  $\delta$  10.04 (s, 1H), 7.92 – 7.81 (m, 2H), 7.58 – 7.48 (m, 1H), 7.36 – 7.28 (m, 2H), 7.20 (dd,  $J_1 = J_2 = 7.5$  Hz, 1H), 7.10 – 6.97 (m, 3H), 6.77 (d,  $J = 8.1$  Hz, 1H), 6.40 (dd,  $J_1 = J_2 = 8.6$  Hz, 2H), 3.62 (s, 3H).  $^{13}\text{C}$  NMR (101 MHz,  $\text{CDCl}_3$ , TMS)  $\delta$  162.4(d,  $J = 247.8$  Hz), 154.5, 153.9, 139.1, 136.3, 133.5, 133.0, 129.72, 129.71, 129.43 (d,  $J = 8.2$  Hz), 129.39 (br), 128.8, 123.9, 122.6, 121.1, 120.1, 115.6 (d,  $J = 21.8$  Hz), 113.7, 111.9, 109.2, 29.6.  $^{19}\text{F}$  NMR (376 MHz,  $\text{CDCl}_3$ , TMS)  $\delta$  -113.52 to -113.63 (m). HRMS (ESI,  $m/z$ ) calcd for  $\text{C}_{23}\text{H}_{17}\text{FN}_3\text{O}^+$   $[\text{M}+\text{H}]^+$ : 370.1350, found 370.1353.

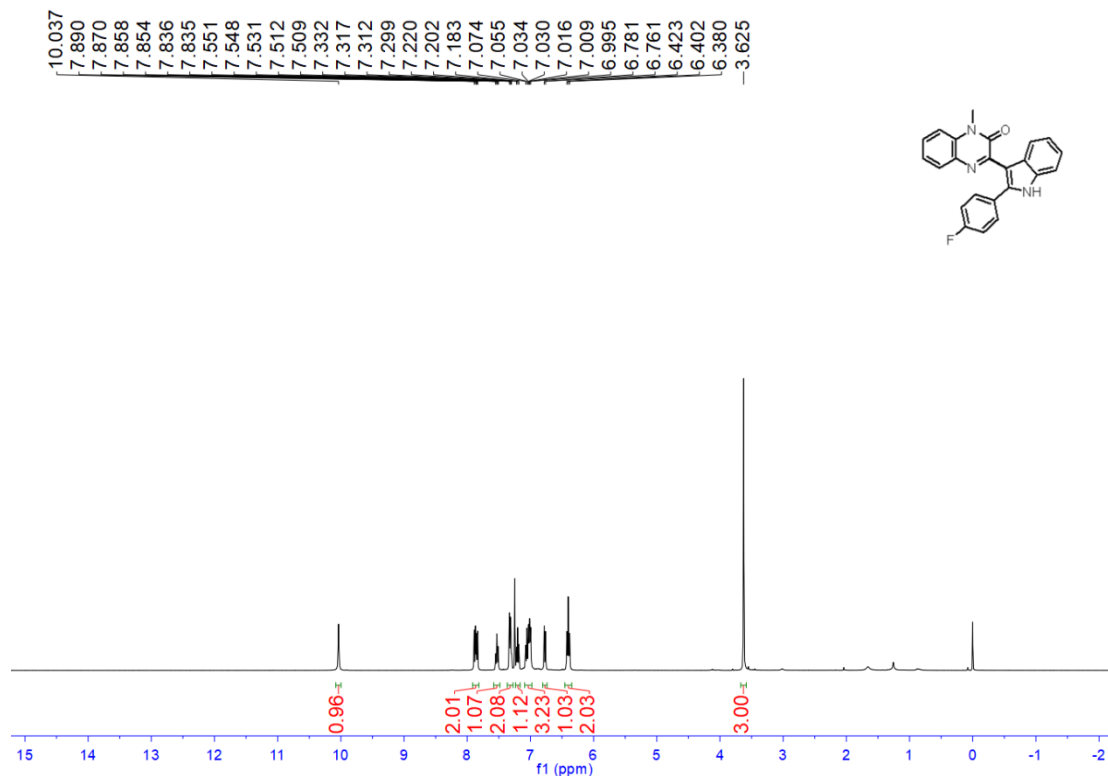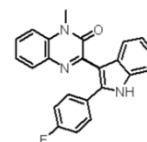

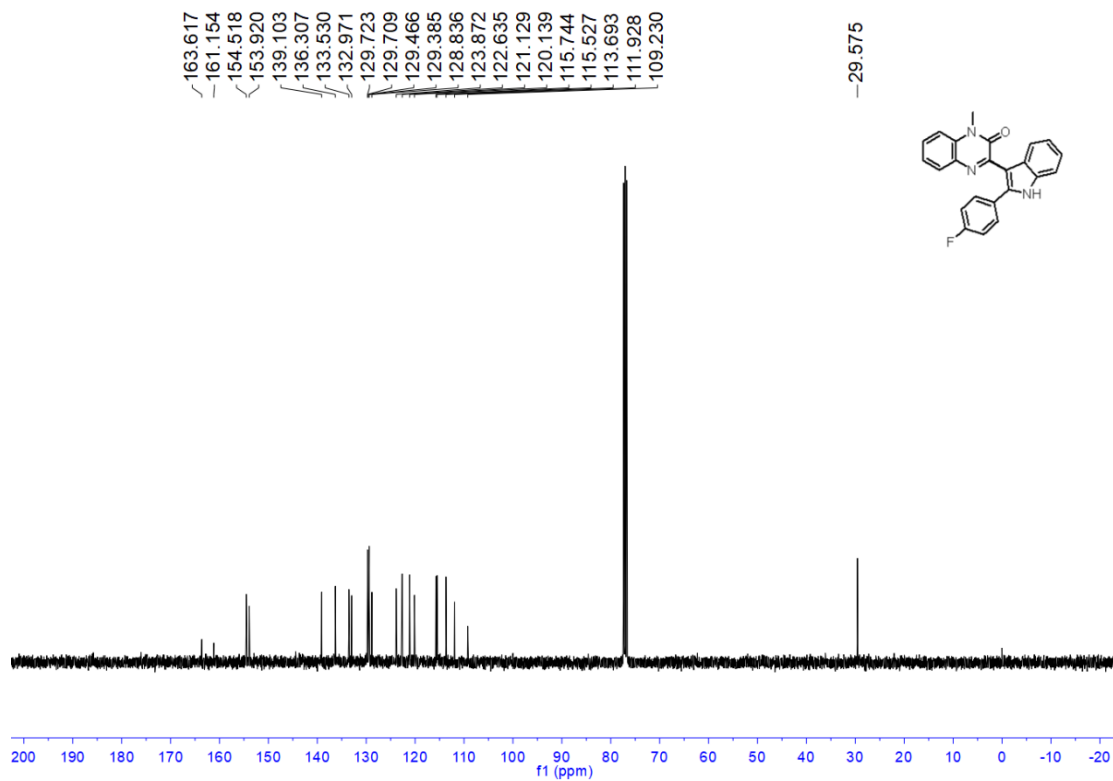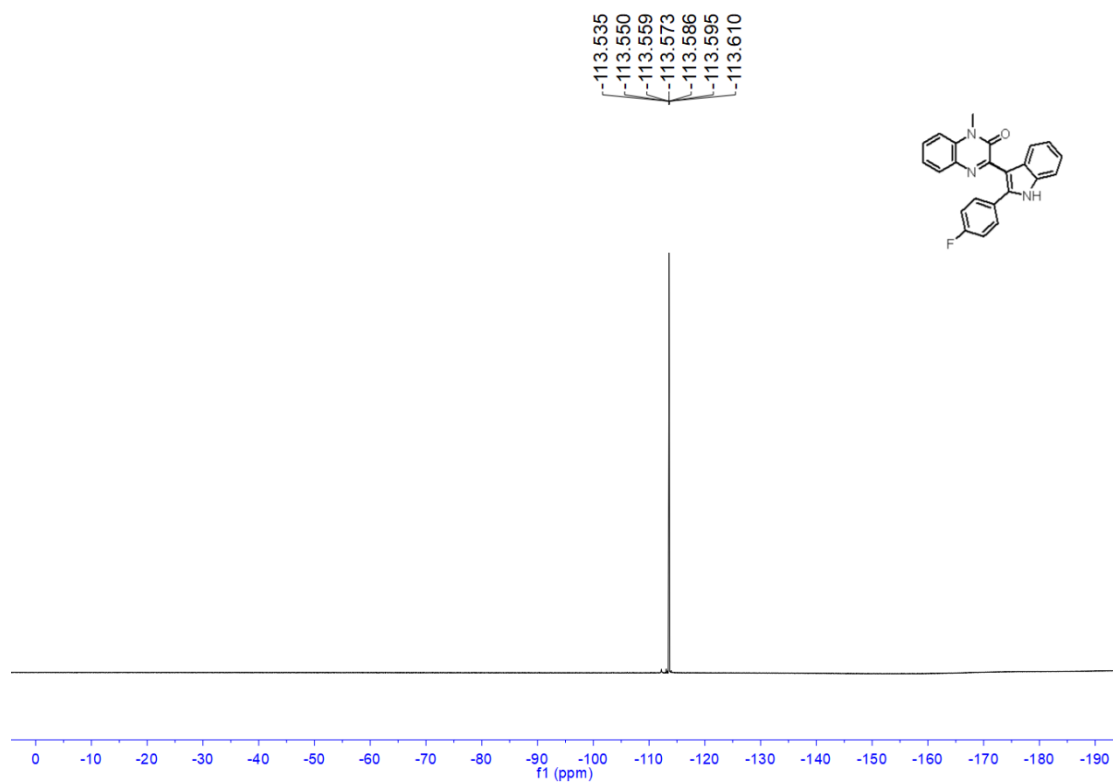

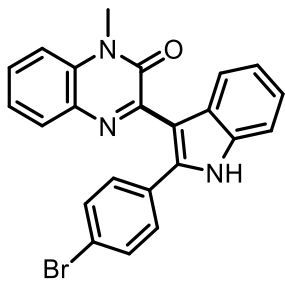

**3-(2-(4-bromophenyl)-1H-indol-3-yl)-1-methylquinoxalin-2(1H)-one (3ax).** Yellow solid, 82.7 mg, yield 96%, m.p.: 251.3-252.4 °C. <sup>1</sup>H NMR (400 MHz, CDCl<sub>3</sub>, TMS) δ 9.83 (s, 1H), 7.88 (d, *J* = 7.4 Hz, 2H), 7.56 (t, *J* = 7.5 Hz, 1H), 7.39 – 7.31 (m, 2H), 7.22 (t, *J* = 7.6 Hz, 1H), 7.13 (dd, *J*<sub>1</sub> = *J*<sub>2</sub> = 7.5 Hz, 1H), 6.97 (d, *J* = 8.3 Hz, 2H), 6.89 (d, *J* = 8.2 Hz, 2H), 6.84 (d, *J* = 8.1 Hz, 1H), 3.65 (s, 3H). <sup>13</sup>C NMR (101 MHz, CDCl<sub>3</sub>, TMS) δ 154.4, 153.7, 138.6, 136.3, 133.5, 133.0, 132.1, 131.8, 129.83, 129.80, 129.1, 128.8, 123.9, 123.0, 122.2, 121.3, 120.3, 113.7, 111.9, 109.7, 29.6. HRMS (ESI, *m/z*) calcd for C<sub>23</sub>H<sub>16</sub>BrN<sub>3</sub>NaO<sup>+</sup> [M+Na]<sup>+</sup>: 452.0369, found 452.0373.

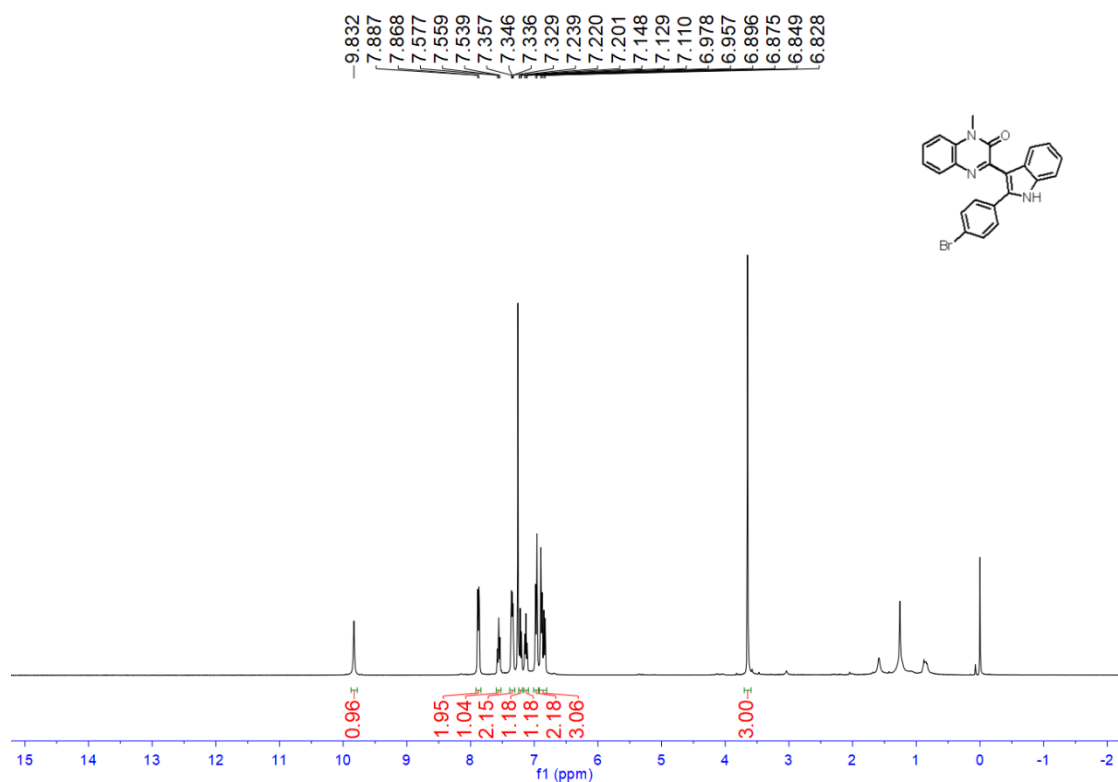

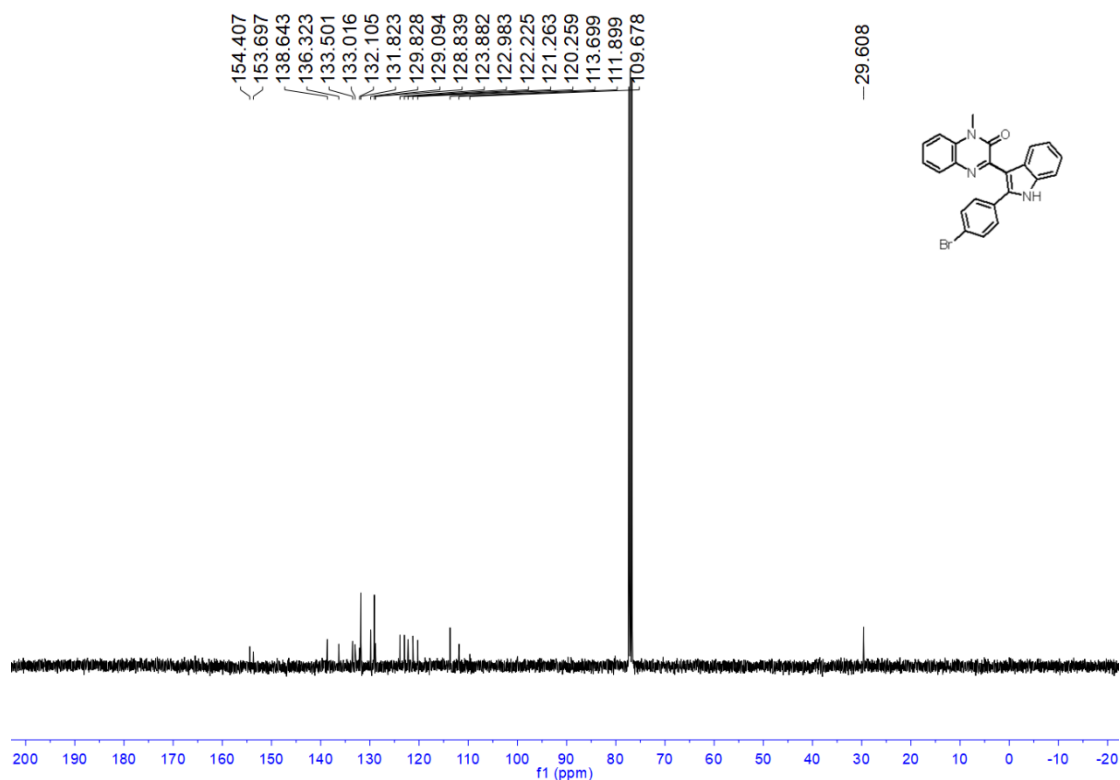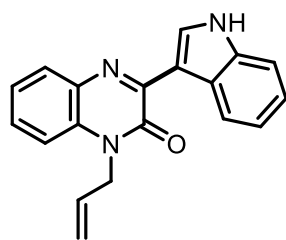

**1-allyl-3-(1H-indol-3-yl)quinoxalin-2(1H)-one (3ba).** A known compound.<sup>4</sup> Yellow solid, 53.9 mg, yield 89%. <sup>1</sup>H NMR (400 MHz, DMSO-*d*<sub>6</sub>) δ 11.84 (s, 1H), 9.00 – 8.89 (m, 2H), 7.92 (d, *J* = 7.6 Hz, 1H), 7.54 (dd, *J* = 5.9, 2.9 Hz, 1H), 7.51 – 7.40 (m, 2H), 7.39 – 7.33 (m, 1H), 7.26 (dd, *J* = 6.0, 3.2 Hz, 2H), 6.06 – 5.93 (m, 1H), 5.18 (d, *J* = 10.4 Hz, 1H), 5.08 (d, *J* = 17.9 Hz, 1H), 4.98 (d, *J* = 4.2 Hz, 2H). <sup>13</sup>C NMR (101 MHz, DMSO-*d*<sub>6</sub>) δ 153.7, 151.1, 136.8, 133.7, 133.6, 132.3, 131.0, 129.0, 128.6, 126.8, 123.9, 123.5, 123.0, 121.5, 117.4, 115.1, 112.4, 111.8, 44.4.



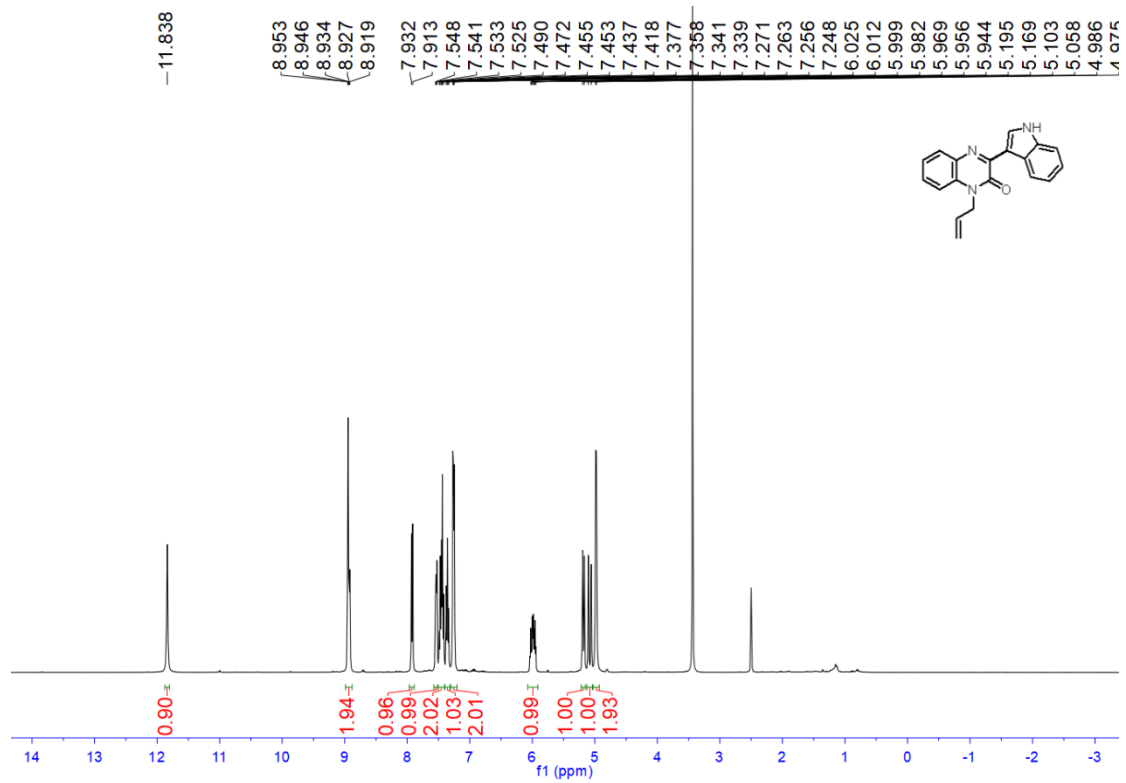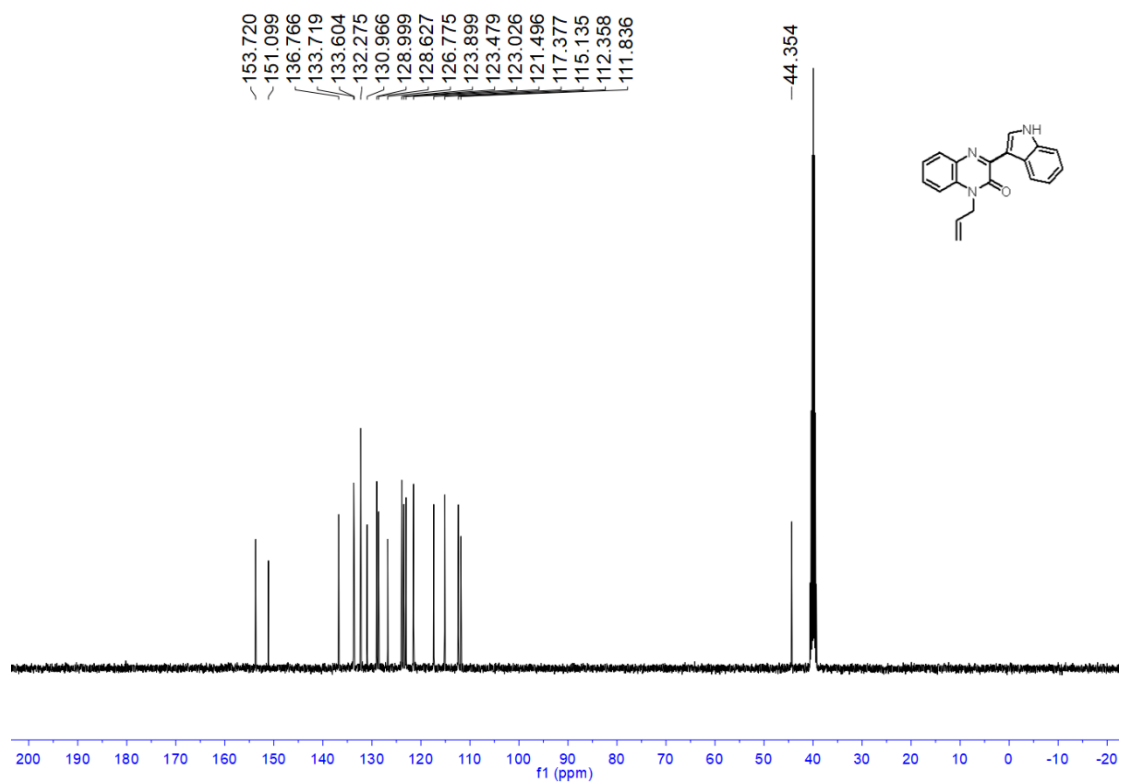

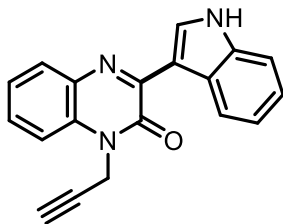

**3-(1*H*-indol-3-yl)-1-(prop-2-yn-1-yl)quinoxalin-2(1*H*)-one**

**(3ca)**. Brown solid, 53.5 mg, yield 89%, m.p.: 228.1-228.7 °C. <sup>1</sup>H NMR (400 MHz, DMSO-*d*<sub>6</sub>) δ 11.86 (s, 1H), 8.93 (d, *J* = 2.7 Hz, 1H), 8.92 – 8.86 (m, 1H), 7.94 (d, *J* = 7.8 Hz, 1H), 7.62 – 7.50 (m, 3H), 7.45 – 7.38 (m, 1H), 7.31 – 7.23 (m, 2H), 5.18 (d, *J* = 1.6 Hz, 2H), 3.35 (s, 1H). <sup>13</sup>C NMR (101 MHz, DMSO-*d*<sub>6</sub>) δ 153.2, 150.9, 136.8, 133.8, 133.6, 130.3, 129.0, 128.8, 126.7, 124.3, 123.4, 123.1, 121.6, 115.1, 112.4, 111.7, 78.8, 75.5, 31.8. HRMS (ESI, *m/z*) calcd for C<sub>19</sub>H<sub>14</sub>N<sub>3</sub>O<sup>+</sup> [M+H]<sup>+</sup>: 300.1131, found 300.1134.

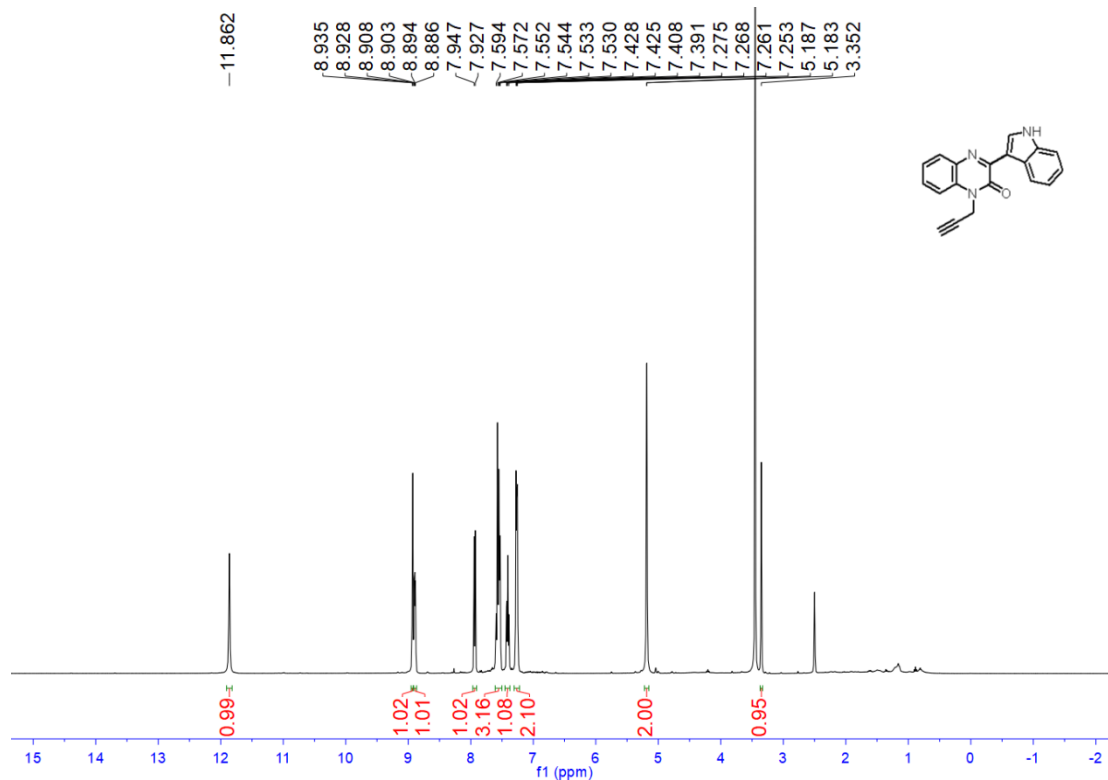

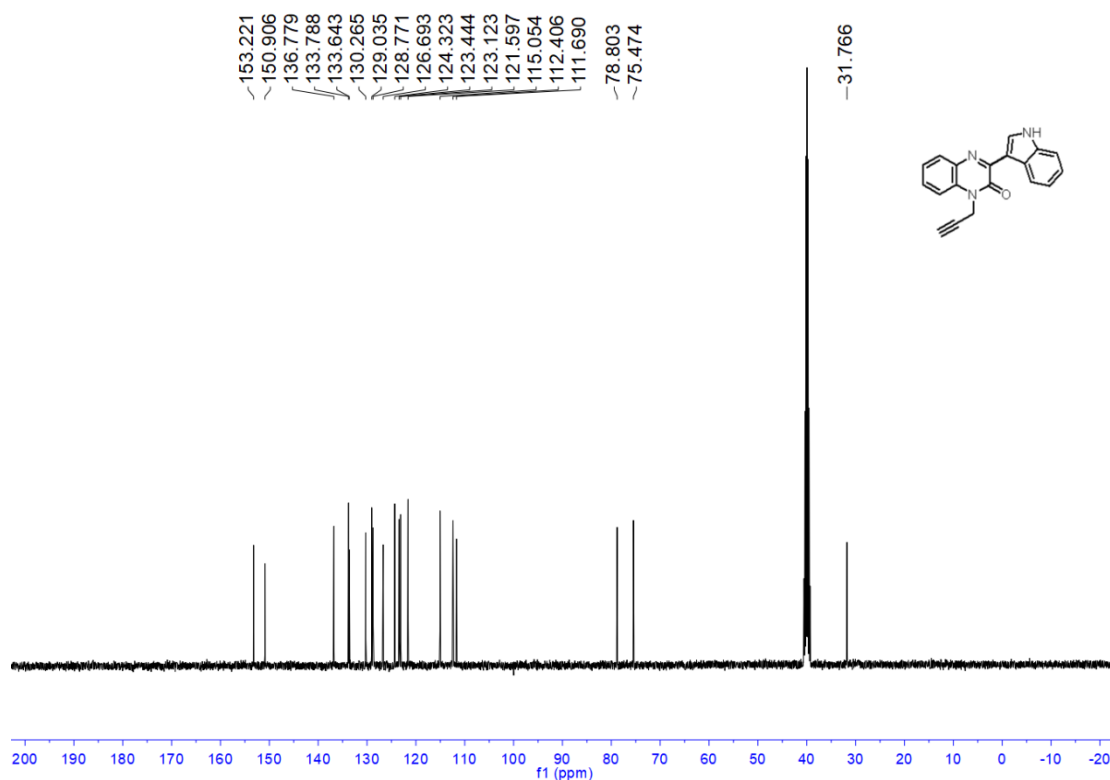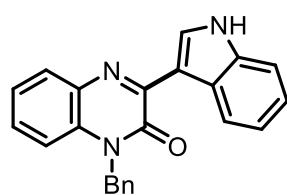

**1-benzyl-3-(1H-indol-3-yl)quinoxalin-2(1H)-one (3da).** A

known compound.<sup>4</sup> Yellow solid, 69.4 mg, yield 99%. <sup>1</sup>H NMR (400 MHz, DMSO-*d*<sub>6</sub>) δ 11.88 (s, 1H), 8.99 (d, *J* = 2.4 Hz, 1H), 8.98 – 8.93 (m, 1H), 7.94 (d, *J* = 7.7 Hz, 1H), 7.60 – 7.51 (m, 1H), 7.40 (d, *J* = 3.7 Hz, 2H), 7.37 – 7.19 (m, 8H), 5.61 (s, 2H). <sup>13</sup>C NMR (101 MHz, DMSO-*d*<sub>6</sub>) δ 154.3, 151.2, 136.8, 136.6, 133.9, 133.8, 131.1, 129.2, 129.1, 128.7, 127.7, 127.2, 126.8, 124.0, 123.5, 123.1, 121.6, 115.2, 112.4, 111.9, 45.4.



**y)acetate (3ea)**. Orange solid, 64.4 mg, yield 93%. m.p.: 214.1-215.6 °C. <sup>1</sup>H NMR (400 MHz, DMSO-*d*<sub>6</sub>) δ 11.87 (s, 1H), 9.00 – 8.86 (m, 2H), 7.96 (d, *J* = 7.9 Hz, 1H), 7.54 (dd, *J* = 5.9, 3.0 Hz, 1H), 7.50 (d, *J* = 3.7 Hz, 2H), 7.40 (dt, *J* = 8.1, 4.1 Hz, 1H), 7.27 (dd, *J* = 6.0, 3.1 Hz, 2H), 5.20 (s, 2H), 4.20 (q, *J* = 7.1 Hz, 2H), 1.23 (t, *J* = 7.1 Hz, 3H). <sup>13</sup>C NMR (101 MHz, DMSO-*d*<sub>6</sub>) δ 168.2, 154.0, 150.8, 136.8, 133.7, 133.5, 131.2, 129.1, 128.8, 126.7, 124.2, 123.4, 123.1, 121.6, 114.7, 112.4, 111.6, 61.8, 44.3, 14.5. HRMS (ESI, *m/z*) calcd for C<sub>20</sub>H<sub>17</sub>N<sub>3</sub>NaO<sub>3</sub><sup>+</sup> [M+Na]<sup>+</sup>: 370.1162, found 370.1163.

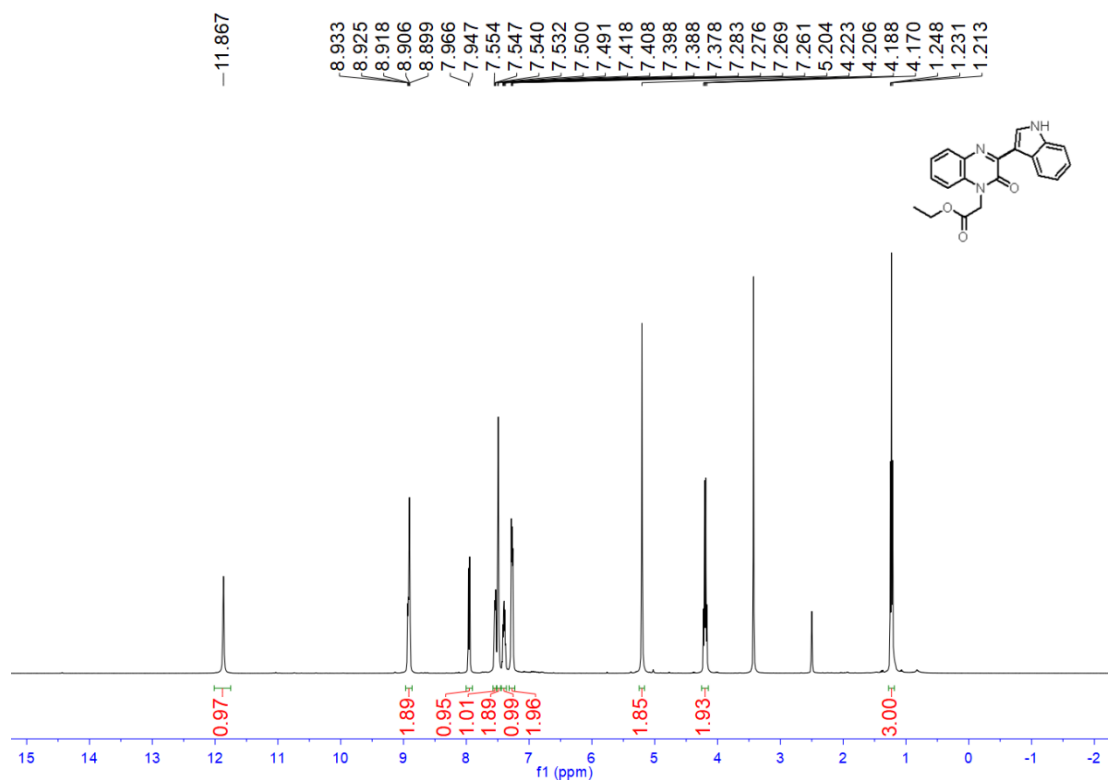

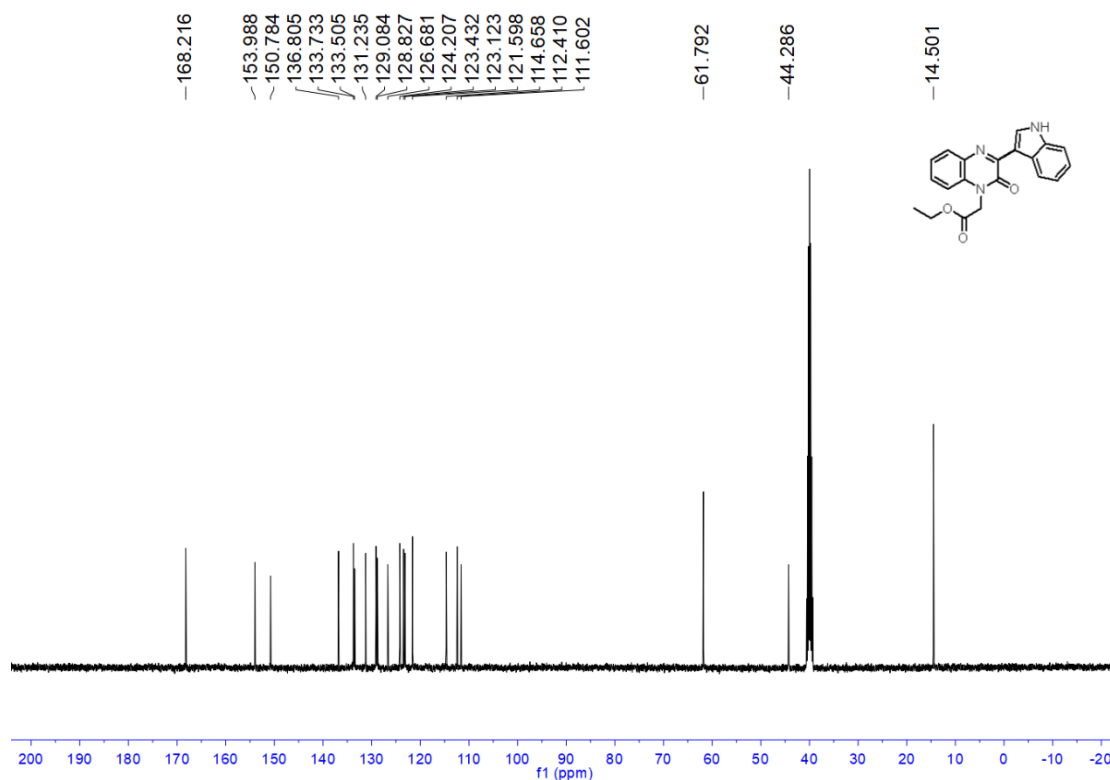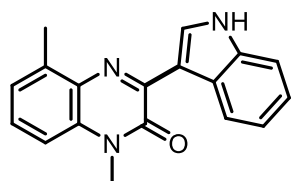

**3-(1H-indol-3-yl)-1,6-dimethylquinoxalin-2(1H)-one (3fa).**

Orange solid, 54.7 mg, yield 94%, m.p.: 284.5-285.7 °C.  $^1\text{H}$  NMR (400 MHz,  $\text{DMSO-}d_6$ )  $\delta$  11.91 – 11.69 (m, 1H), 8.95 (d,  $J = 2.7$  Hz, 1H), 8.86 – 8.77 (m, 1H), 7.56 – 7.49 (m, 1H), 7.44 – 7.32 (m, 2H), 7.29 – 7.21 (m, 3H), 3.70 (s, 3H), 2.76 (s, 3H).  $^{13}\text{C}$  NMR (101 MHz,  $\text{DMSO-}d_6$ )  $\delta$  154.0, 149.4, 136.74, 136.67, 133.6, 132.0, 128.5, 126.6, 125.0, 123.1, 122.9, 121.5, 112.9, 112.5, 112.4, 29.7, 18.7. HRMS (ESI,  $m/z$ ) calcd for  $\text{C}_{18}\text{H}_{16}\text{N}_3\text{O}^+$   $[\text{M}+\text{H}]^+$ : 290.1288, found 290.1289.

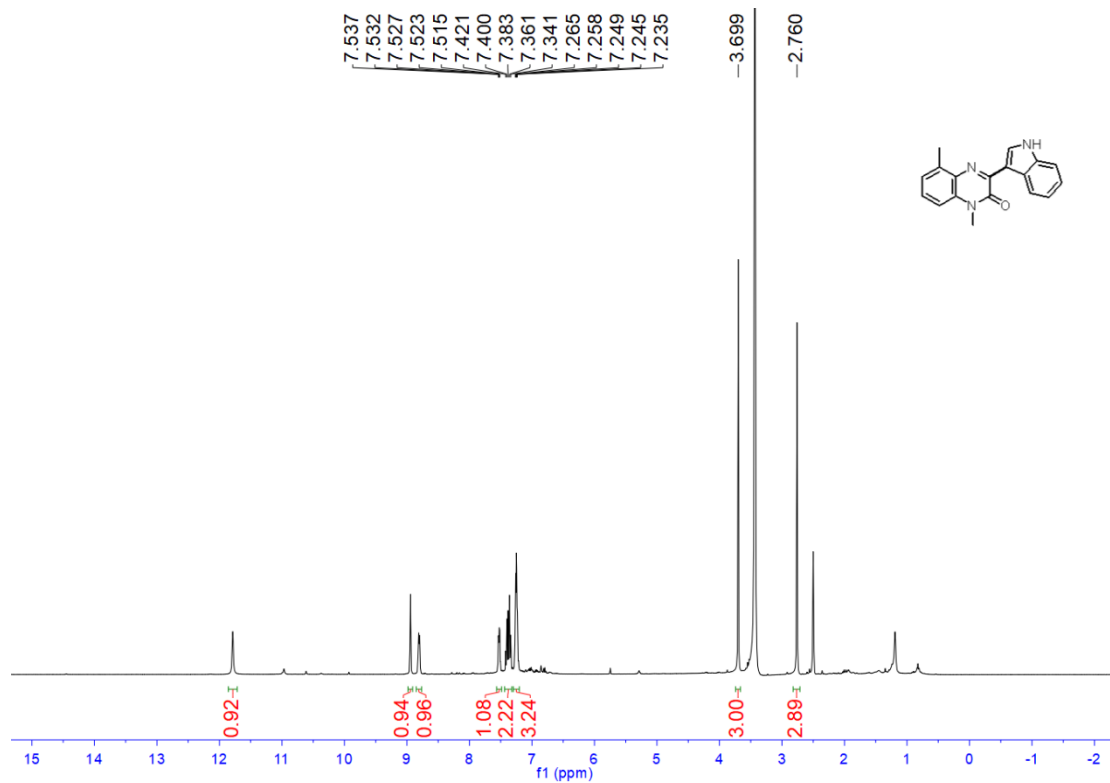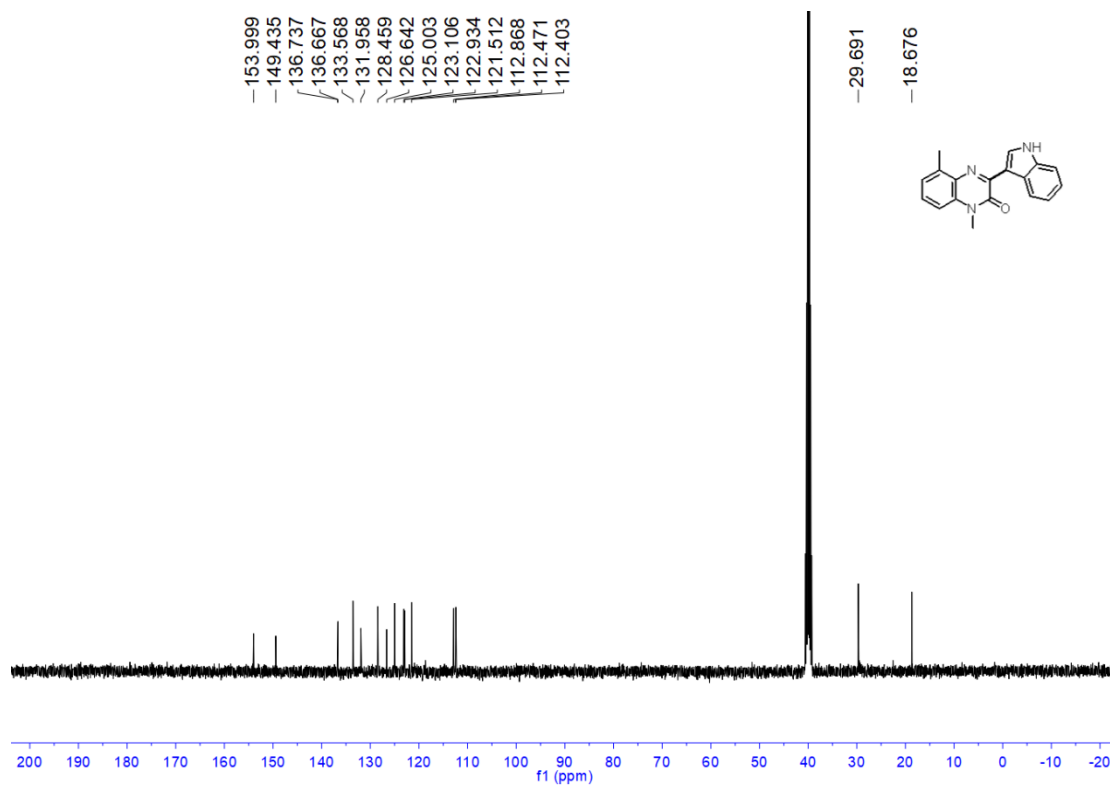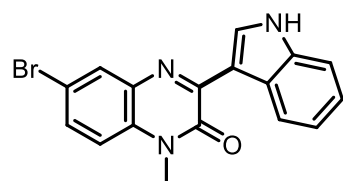

**6-bromo-3-(1H-indol-3-yl)-1-methylquinoxalin-2(1H)-one (3ga).** Orange solid, 68.4 mg, yield 97%. m.p.: 289.2-290.1 °C. <sup>1</sup>H NMR (400 MHz,

DMSO-*d*<sub>6</sub>) δ 11.85 (s, 1H), 8.92 (d, *J* = 2.4 Hz, 1H), 8.85 (d, *J* = 6.7 Hz, 1H), 8.11 – 7.96 (m, 1H), 7.65 – 7.55 (m, 1H), 7.51 (d, *J* = 6.7 Hz, 1H), 7.39 (d, *J* = 8.9 Hz, 1H), 7.29 – 7.17 (m, 2H), 3.63 (s, 3H). <sup>13</sup>C NMR (101 MHz, DMSO-*d*<sub>6</sub>) δ 153.8, 152.0, 136.8, 134.6, 134.3, 131.3, 130.7, 130.5, 126.7, 123.6, 123.1, 121.7, 116.8, 115.5, 112.4, 111.8, 29.7. HRMS (ESI, *m/z*) calcd for C<sub>17</sub>H<sub>12</sub>BrN<sub>3</sub>NaO<sup>+</sup> [M+Na]<sup>+</sup>: 376.0056, found 376.0060.

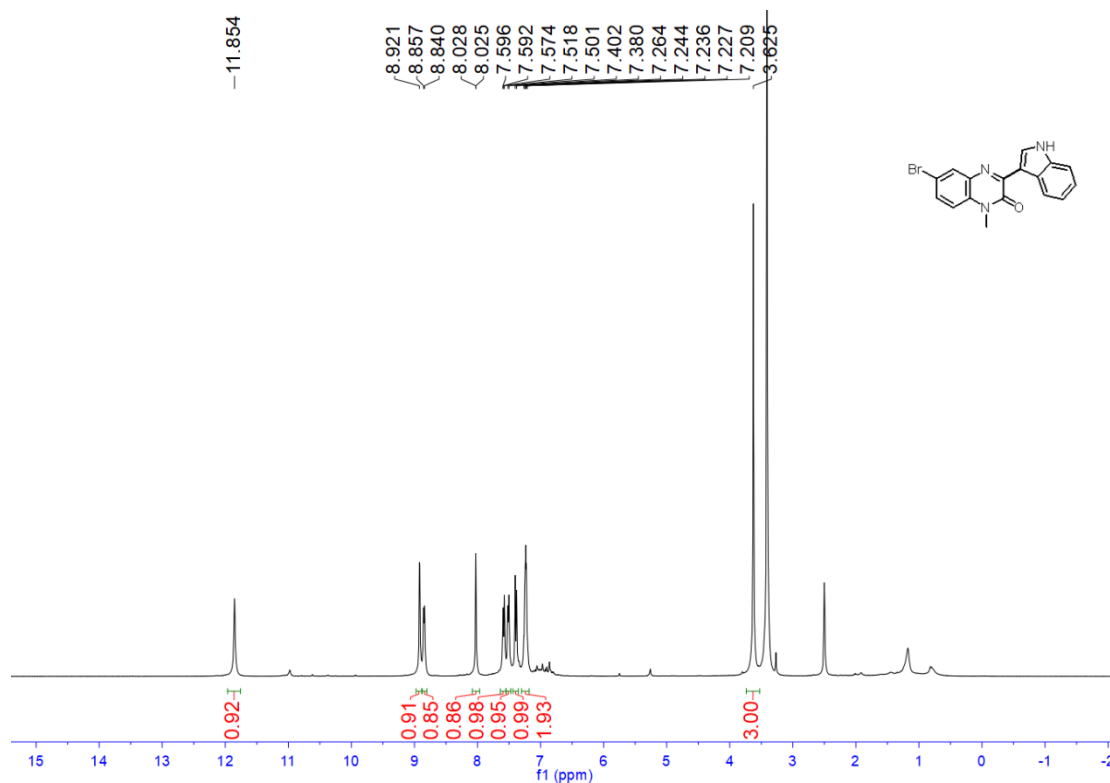



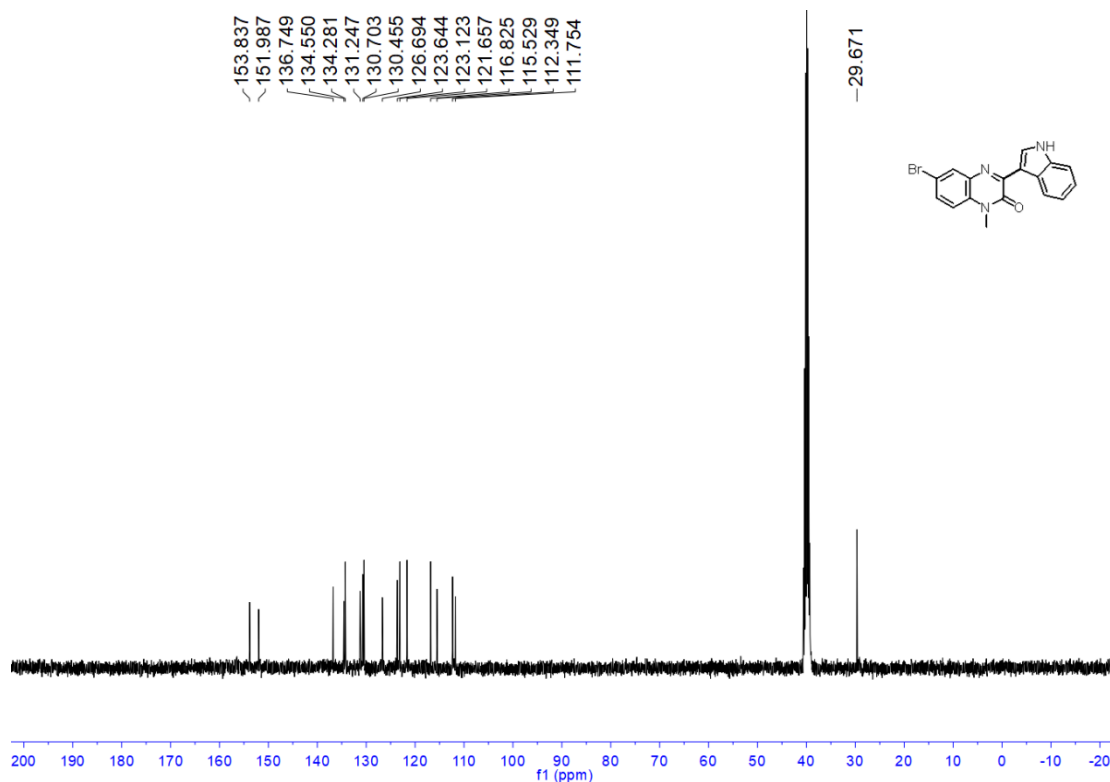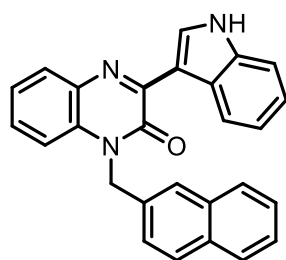

**3-(1H-indol-3-yl)-1-(naphthalen-2-ylmethyl)quinoxalin-**

**2(1H)-one (3ha).** Yellow solid, 73.8 mg, yield 92%. m.p.: 191.3-192.7 °C. <sup>1</sup>H NMR (400 MHz, DMSO-*d*<sub>6</sub>) δ 11.90 (s, 1H), 9.04 (d, *J* = 2.4 Hz, 1H), 9.02 – 8.97 (m, 1H), 7.96 (*J* = 7.6, 1.2 Hz, 1H), 7.90 – 7.82 (m, 2H), 7.81 – 7.76 (m, 1H), 7.74 (s, 1H), 7.61 – 7.54 (m, 1H), 7.50 – 7.40 (m, 4H), 7.40 – 7.25 (m, 4H), 5.77 (s, 2H). <sup>13</sup>C NMR (101 MHz, DMSO-*d*<sub>6</sub>) δ 159.1, 156.1, 141.6, 139.0, 138.8, 138.6, 138.1, 137.4, 135.9, 133.9, 133.7, 133.4, 132.8, 132.7, 131.6, 131.5, 131.2, 130.2, 128.8, 128.4, 128.2, 127.9, 126.3, 120.0, 117.2, 116.7, 50.5. HRMS (ESI, *m/z*) calcd for C<sub>27</sub>H<sub>20</sub>N<sub>3</sub>O<sup>+</sup> [M+H]<sup>+</sup>: 402.1601, found 402.1603.

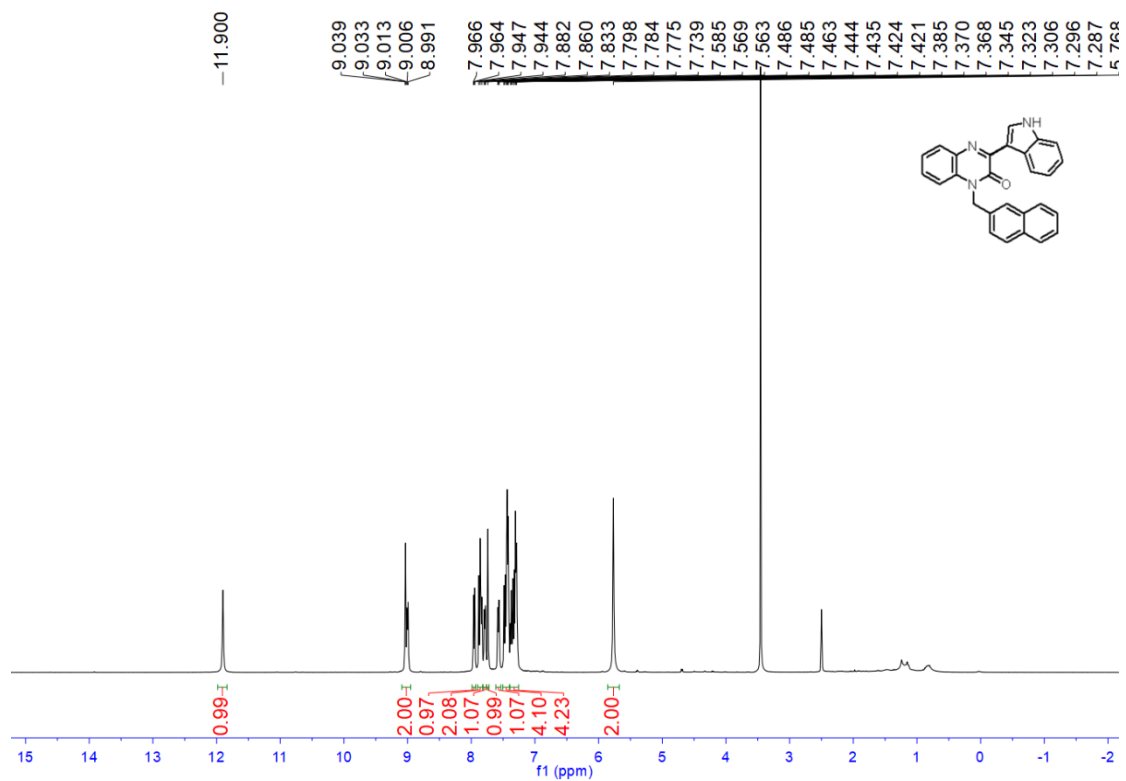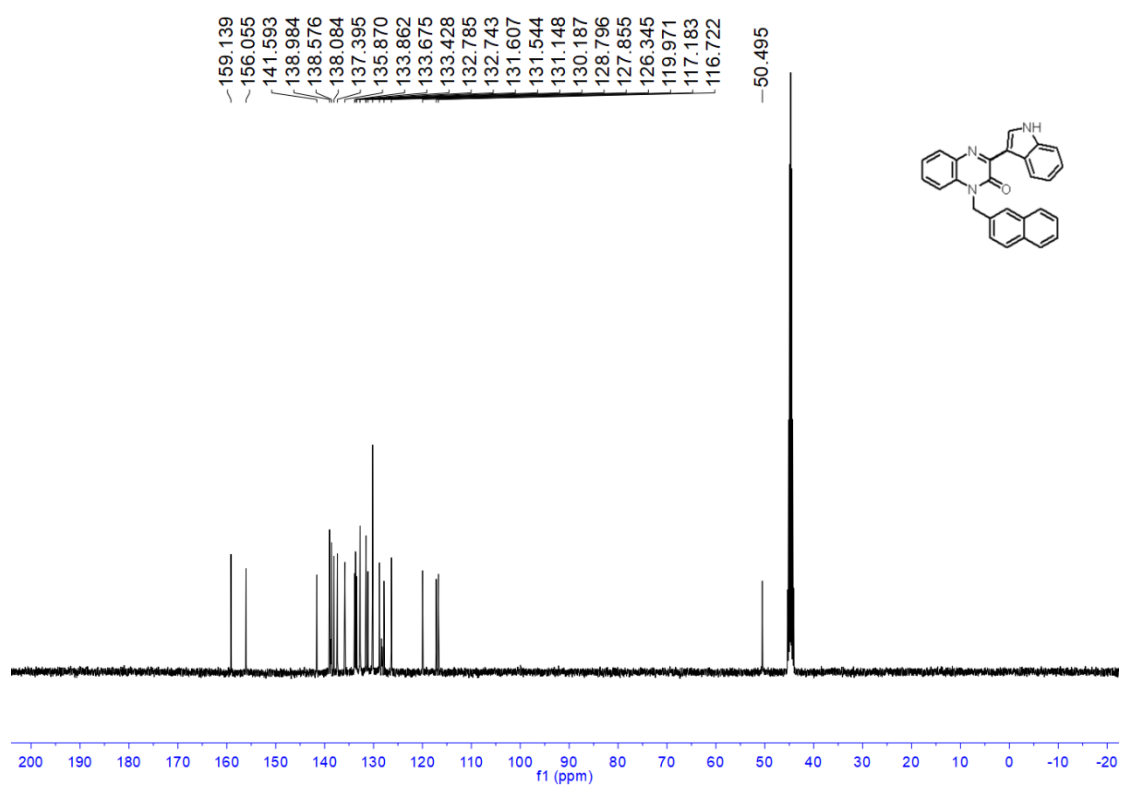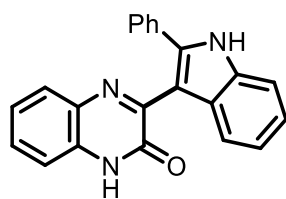

**3-(2-phenyl-1H-indol-3-yl)quinoxalin-2(1H)-one**

**(3ia)**. Yellow solid, 46.3 mg, yield 69%. m.p.: 167.2-168.9 °C. <sup>1</sup>H NMR (400 MHz, DMSO-*d*<sub>6</sub>) δ 12.28 (br, 1H), 11.85 (s, 1H), 7.79 – 6.69 (m, 2H), 7.57 – 7.44 (m, 4H), 7.43 – 7.35 (m, 2H), 7.35 – 7.25 (m, 3H), 7.23 – 7.15 (m, 1H), 7.13 – 7.05 (m, 1H). <sup>13</sup>C NMR (101 MHz, DMSO-*d*<sub>6</sub>) δ 155.5, 154.5, 139.8, 136.5, 133.8, 132.9, 132.2, 129.9, 129.0, 128.9, 128.7, 128.2, 128.1, 123.6, 122.6, 120.6, 120.5, 115.5, 111.9, 109.0. HRMS (ESI, *m/z*) calcd for C<sub>22</sub>H<sub>15</sub>N<sub>3</sub>NaO<sup>+</sup> [M+Na]<sup>+</sup>: 360.1107, found 360.1108.

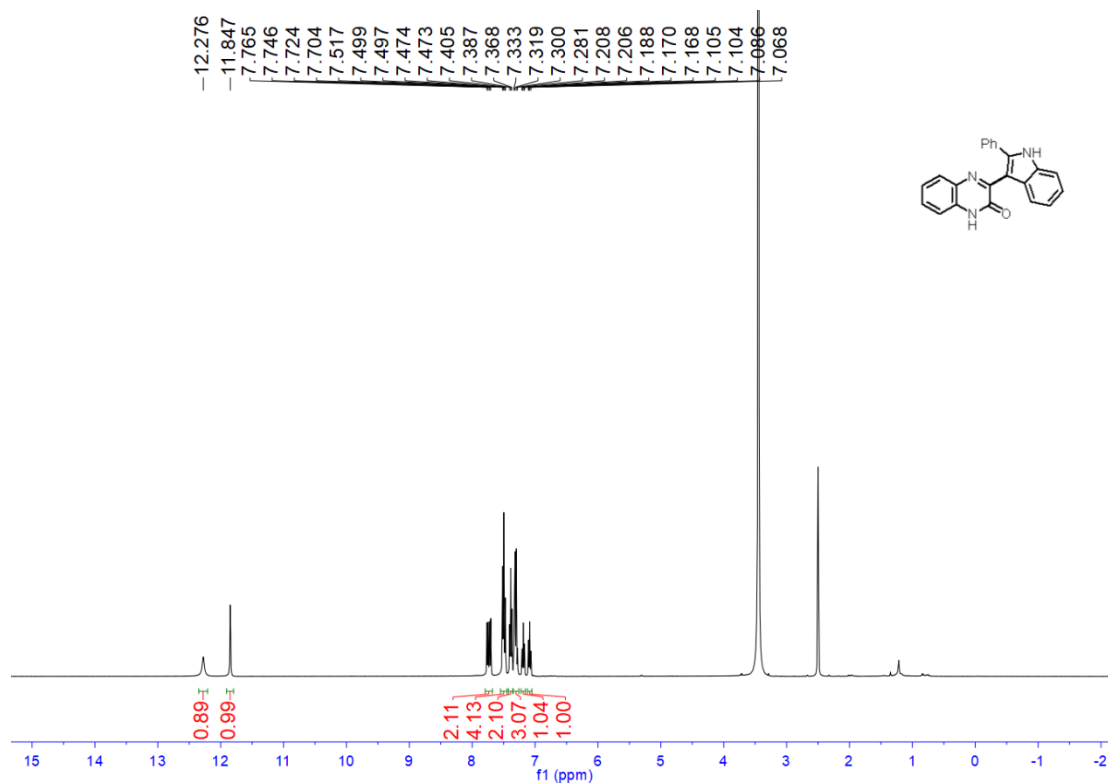

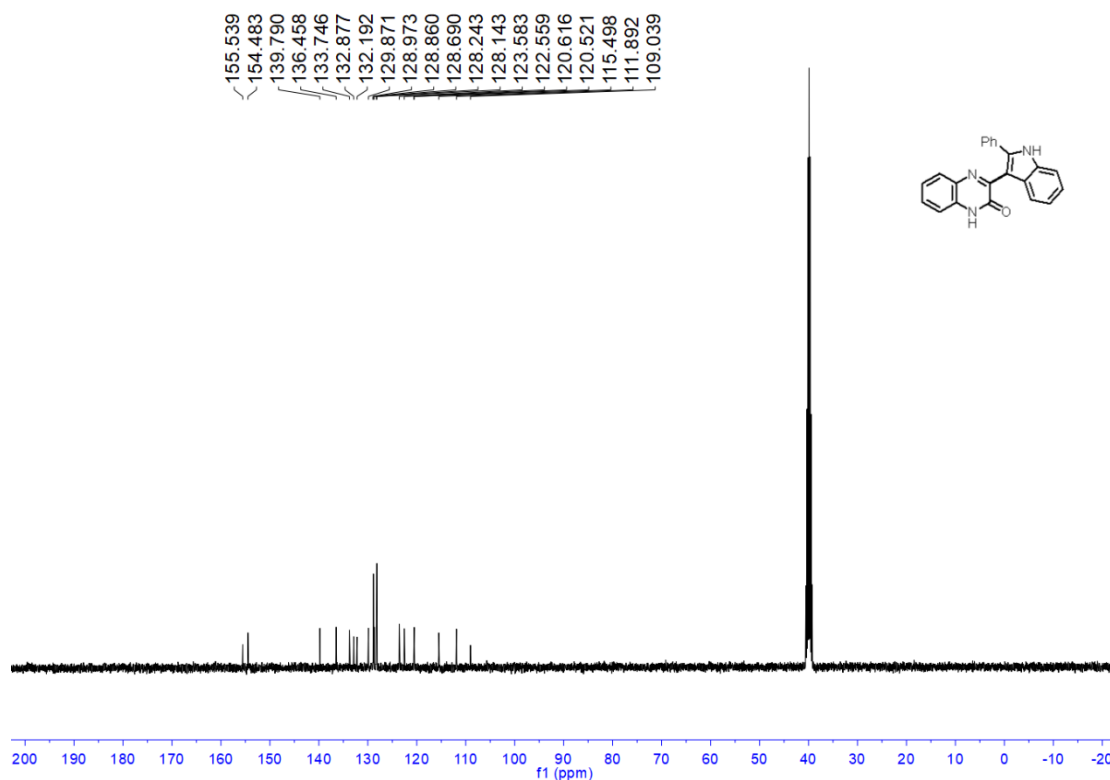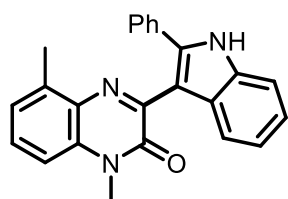

**1,6-dimethyl-3-(2-phenyl-1*H*-indol-3-yl)quinoxalin-**

**2(1*H*)-one (3ja).** Yellow solid, 68.7 mg, yield 94%. m.p.: 252.3-253.1 °C. <sup>1</sup>H NMR (400 MHz, DMSO-*d*<sub>6</sub>) δ 11.88 (s, 1H), 7.79 (d, *J* = 7.9 Hz, 1H), 7.56 – 7.48 (m, 3H), 7.47 – 7.42 (m, 1H), 7.41 – 7.30 (m, 4H), 7.24 – 7.16 (m, 2H), 7.14 – 7.07 (m, 1H), 3.58 (s, 3H), 2.44 (s, 3H). <sup>13</sup>C NMR (101 MHz, DMSO-*d*<sub>6</sub>) δ 154.1, 151.9, 140.3, 137.6, 136.4, 133.8, 133.5, 131.6, 129.8, 128.8, 128.7, 128.6, 128.2, 124.8, 122.5, 121.1, 120.5, 112.9, 111.9, 110.2, 29.8, 17.6. HRMS (ESI, *m/z*) calcd for C<sub>24</sub>H<sub>20</sub>N<sub>3</sub>O<sup>+</sup> [M+H]<sup>+</sup>: 366.1601, found 366.1602.

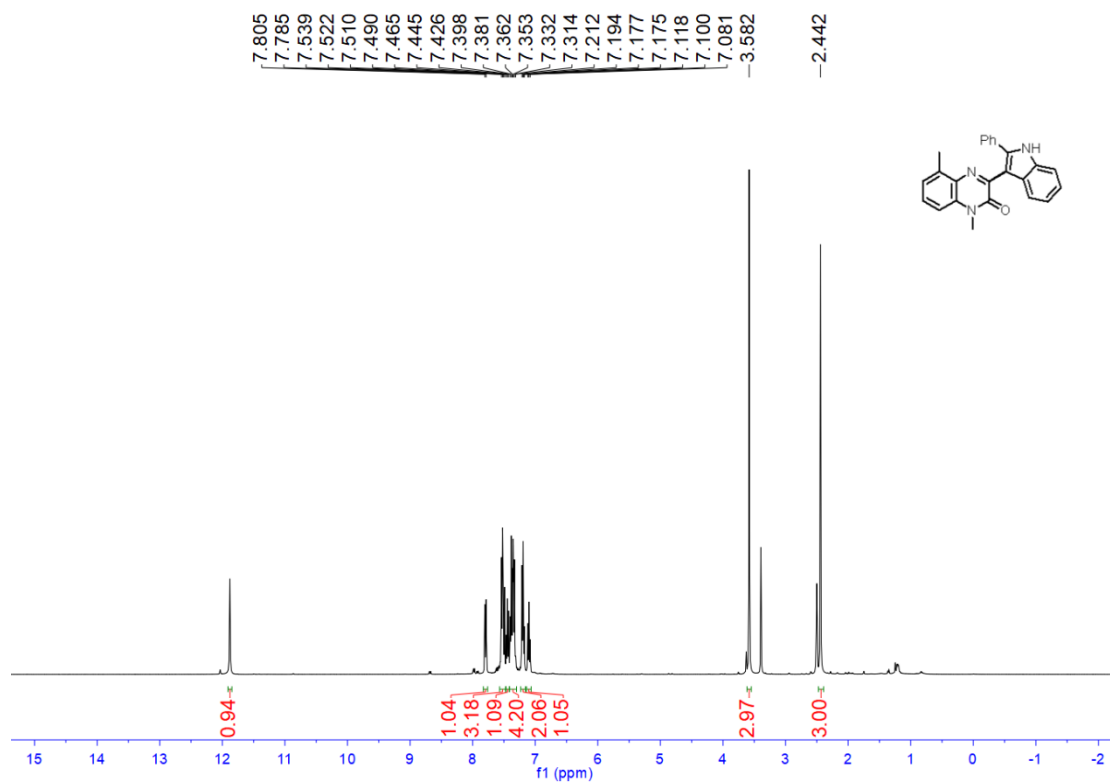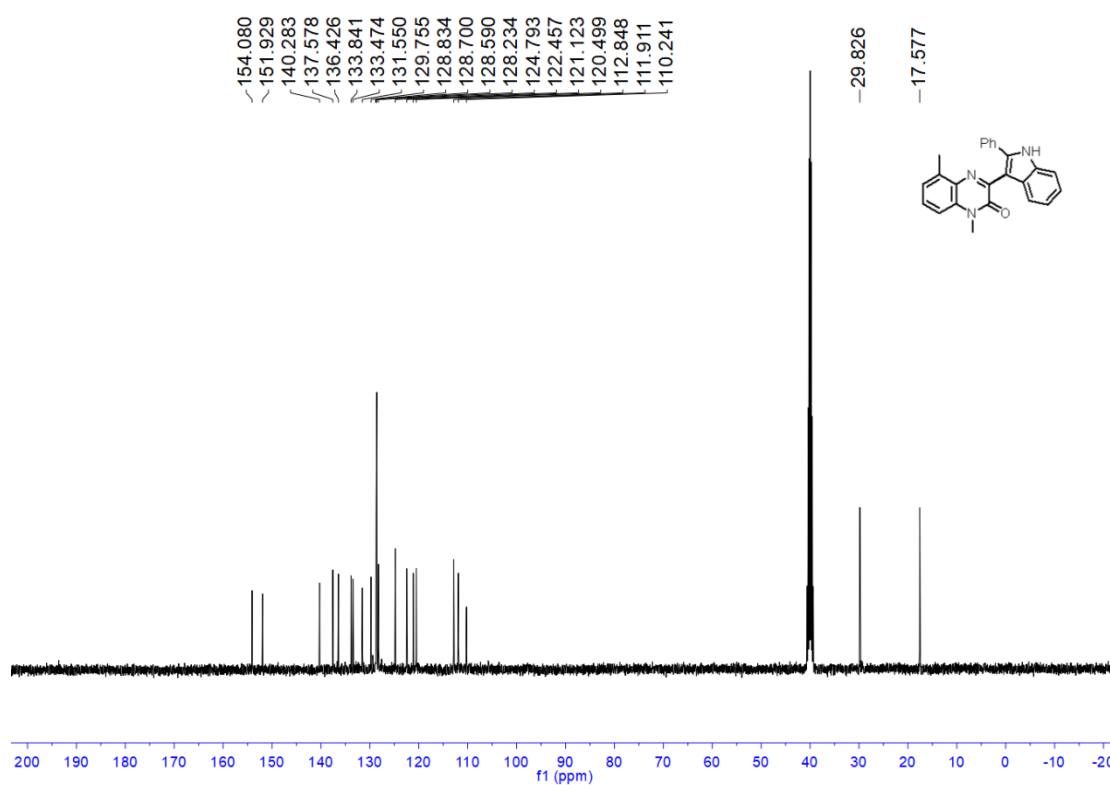

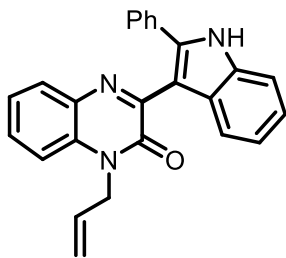

**1-allyl-3-(2-phenyl-1H-indol-3-yl)quinoxalin-**

**2(1H)-one (3ka).** Yellow solid, 74.0 mg, yield 98%. m.p.: 233.6-234.0 °C. <sup>1</sup>H NMR (400 MHz, DMSO-*d*<sub>6</sub>) δ 11.89 (s, 1H), 7.86 – 7.80 (m, 1H), 7.75 (d, *J* = 7.9 Hz, 1H), 7.60 – 7.54 (m, 1H), 7.54 – 7.43 (m, 4H), 7.41 – 7.28 (m, 4H), 7.24 – 7.16 (m, 1H), 7.14 – 7.07 (m, 1H), 5.95 – 5.82 (m, 1H), 5.19 – 5.12 (m, 1H), 5.08 – 4.99 (m, 1H), 4.85 – 4.76 (m, 2H). <sup>13</sup>C NMR (101 MHz, DMSO-*d*<sub>6</sub>) δ 154.0, 153.6, 139.9, 136.5, 133.7, 133.4, 132.5, 132.0, 130.1, 129.6, 129.0, 128.8, 128.3, 128.2, 123.8, 122.6, 120.64, 120.57, 117.2, 115.3, 111.9, 109.3, 44.3. HRMS (ESI, *m/z*) calcd for C<sub>25</sub>H<sub>20</sub>N<sub>3</sub>O<sup>+</sup> [M+H]<sup>+</sup>: 378.1601, found 378.1604.

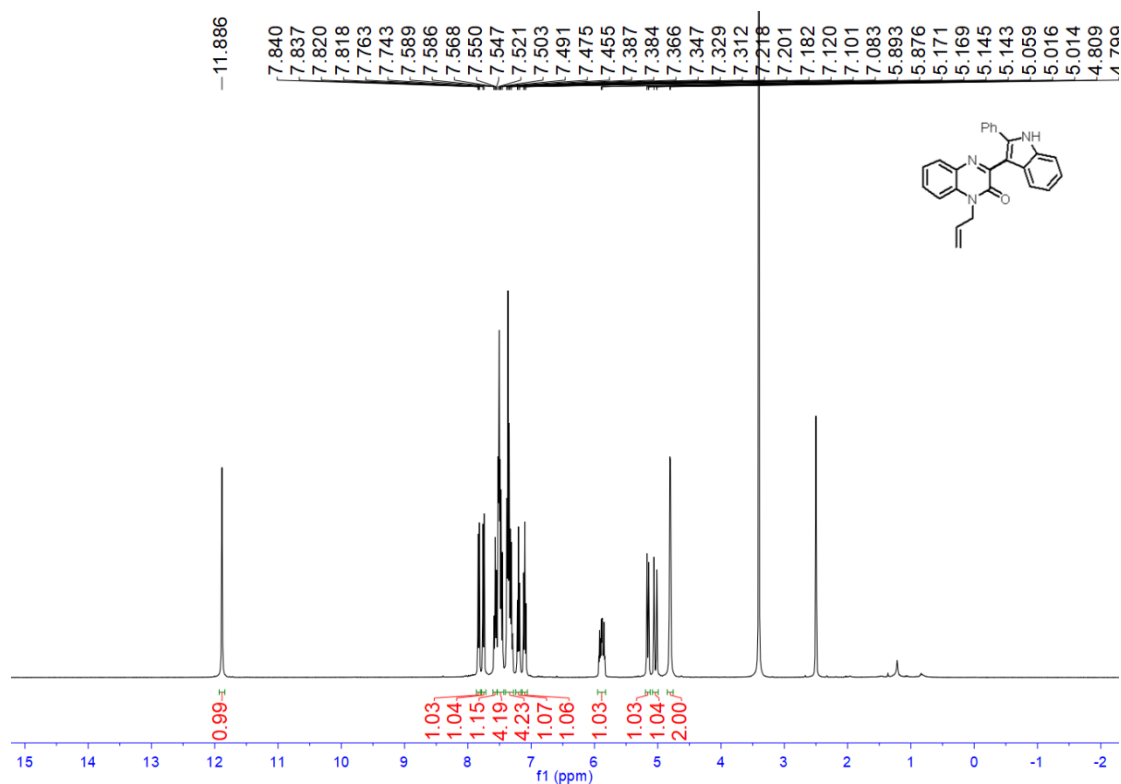

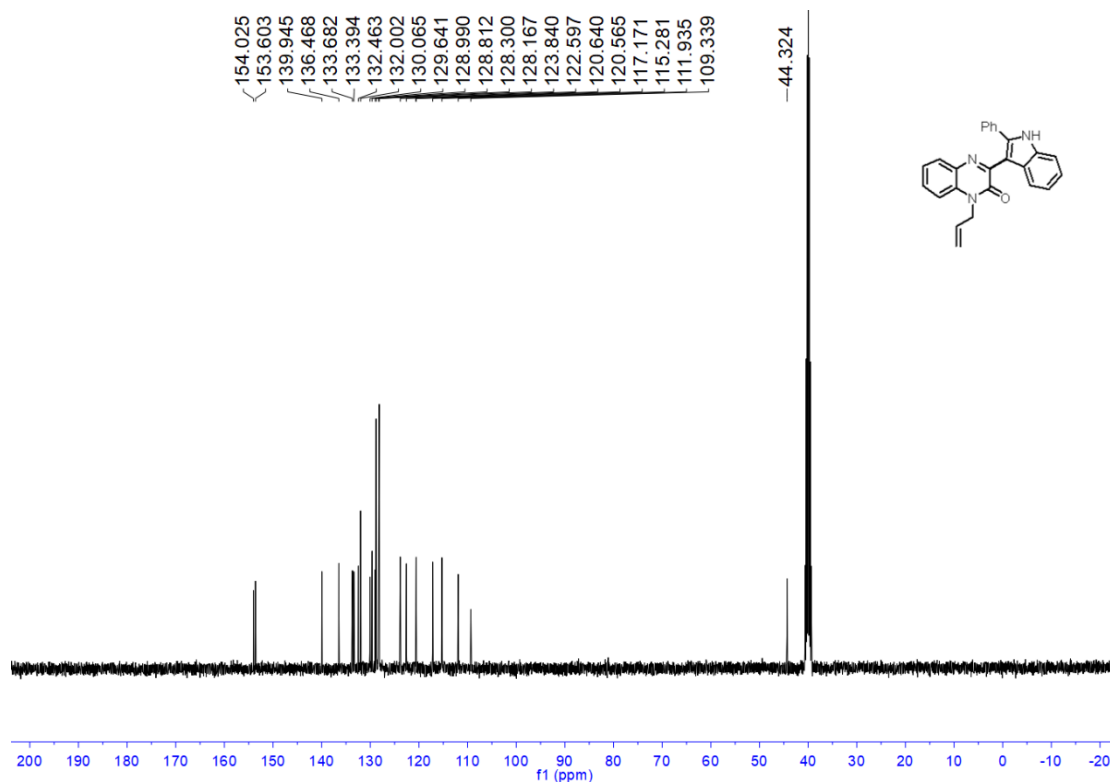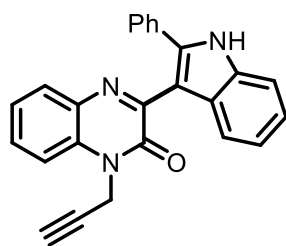

**3-(2-phenyl-1*H*-indol-3-yl)-1-(prop-2-yn-1-**

**yl)quinoxalin-2(1*H*)-one (3la).** Yellow solid, 74.5 mg, yield 99%. m.p.: 203.1-204.3 °C. <sup>1</sup>H NMR (400 MHz, DMSO-*d*<sub>6</sub>) δ 11.95 (s, 1H), 7.86 (d, *J* = 7.8 Hz, 1H), 7.79 (d, *J* = 8.0 Hz, 1H), 7.69 – 7.60 (m, 2H), 7.58 – 7.51 (m, 3H), 7.46 – 7.31 (m, 4H), 7.27 – 7.19 (m, 1H), 7.16 – 7.10 (m, 1H), 5.08 – 5.00 (m, 2H), 3.36 – 3.2 (m, 1H). <sup>13</sup>C NMR (101 MHz, DMSO-*d*<sub>6</sub>) δ 153.9, 153.2, 140.2, 136.5, 133.6, 133.4, 131.8, 130.2, 129.7, 129.0, 128.9, 128.4, 128.3, 124.3, 122.7, 120.74, 120.68, 115.2, 112.0, 109.2, 78.6, 75.4, 31.9. HRMS (ESI, *m/z*) calcd for C<sub>25</sub>H<sub>17</sub>N<sub>3</sub>NaO<sup>+</sup> [M+Na]<sup>+</sup>: 398.1264, found 398.1265.

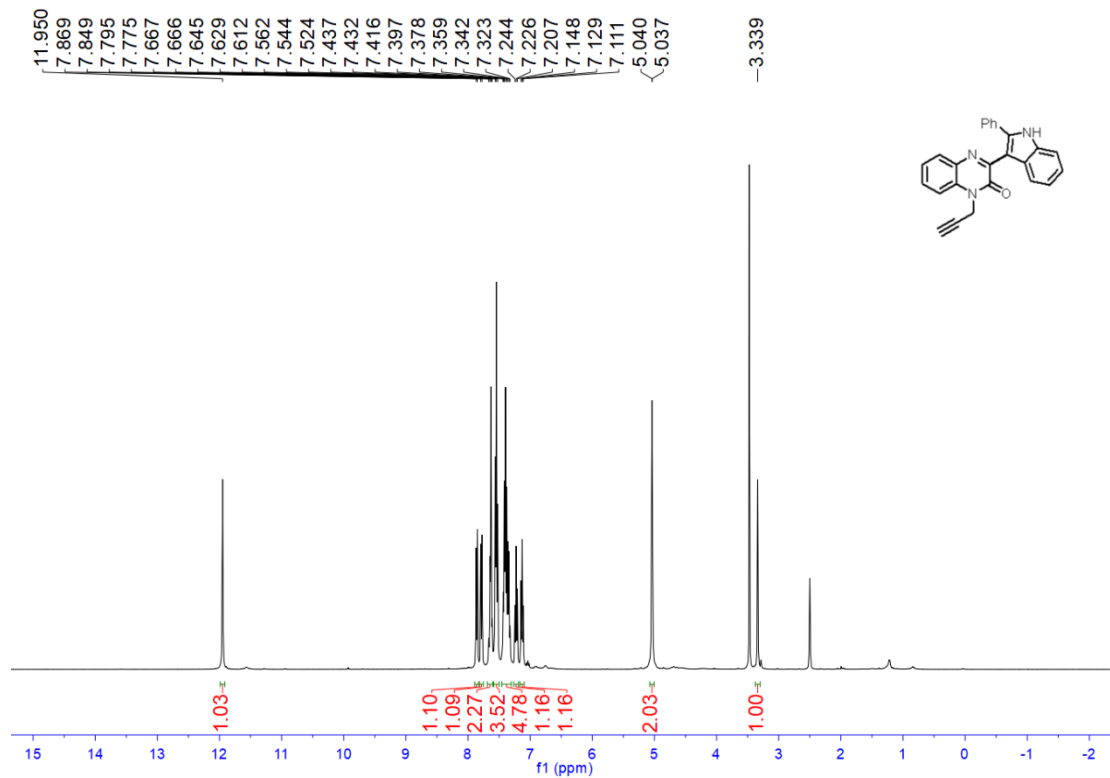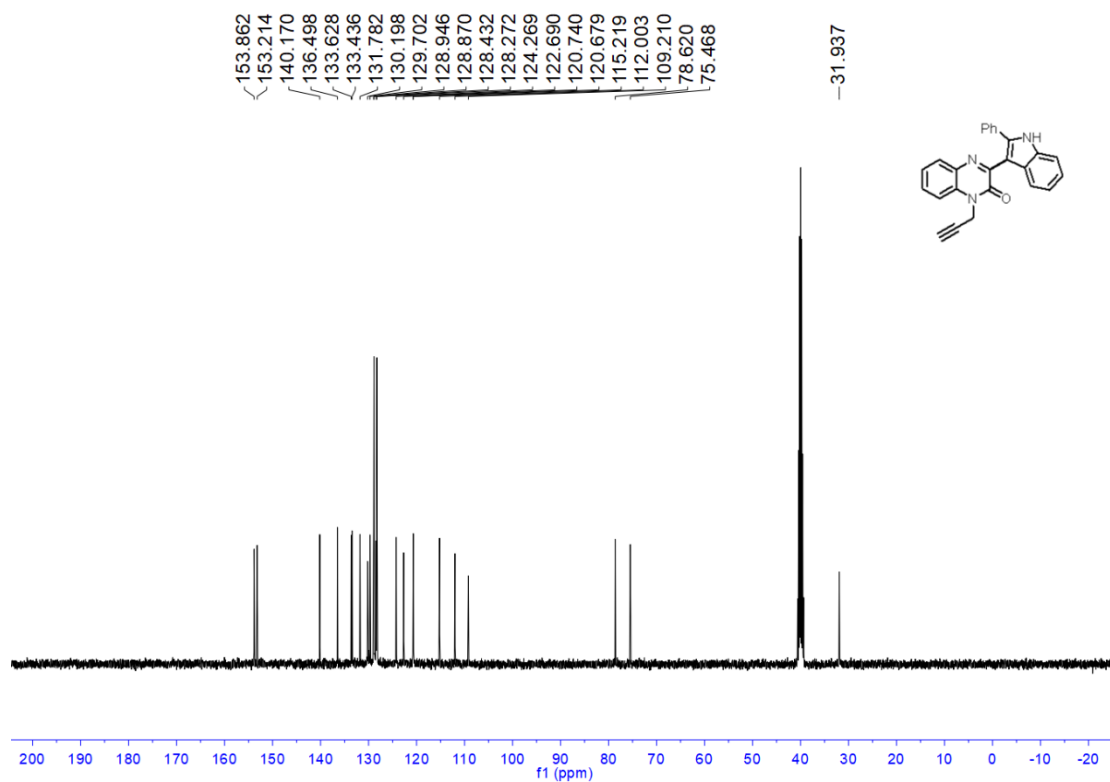



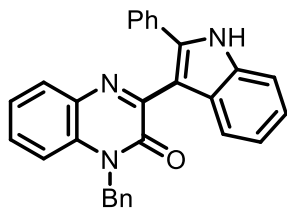

### 1-benzyl-3-(2-phenyl-1*H*-indol-3-yl)quinoxalin-

**2(1*H*)-one (3ma).** Yellow solid, 72.3 mg, yield 85%. m.p.: 194.1-194.9 °C. <sup>1</sup>H NMR (400 MHz, DMSO-*d*<sub>6</sub>) δ 11.93 (s, 1H), 7.86 (d, *J* = 7.8 Hz, 1H), 7.81 (d, *J* = 7.9 Hz, 1H), 7.56 – 7.47 (m, 4H), 7.45 – 7.38 (m, 3H), 7.38 – 7.29 (m, 4H), 7.28 – 7.22 (m, 1H), 7.22 – 7.18 (m, 3H), 7.15 – 7.10 (m, 1H), 5.40 (s, 2H). <sup>13</sup>C NMR (101 MHz, DMSO-*d*<sub>6</sub>) δ 154.2, 154.1, 140.4, 136.5, 136.4, 133.9, 133.5, 132.5, 130.1, 129.7, 129.1, 129.0, 128.9, 128.3, 128.2, 127.8, 127.3, 124.0, 122.7, 120.7, 120.5, 115.3, 112.0, 109.2, 45.5. HRMS (ESI, *m/z*) calcd for C<sub>29</sub>H<sub>21</sub>N<sub>3</sub>NaO<sup>+</sup> [M+Na]<sup>+</sup>: 450.1577, found 450.1577.

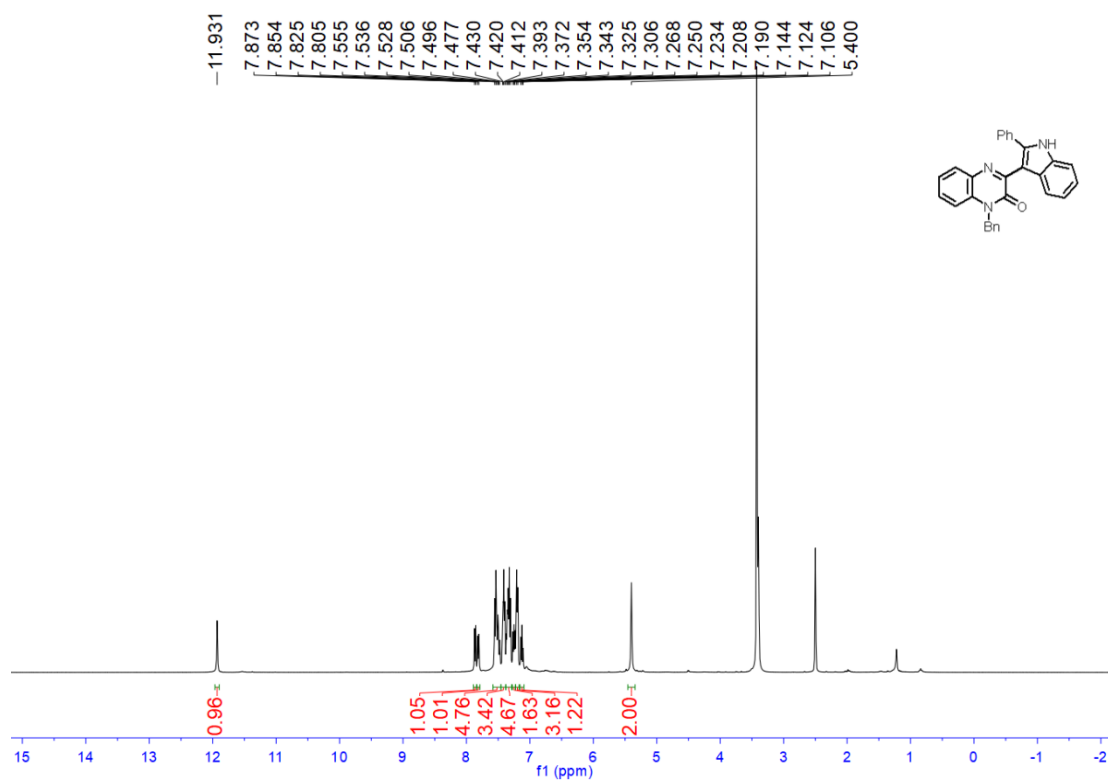

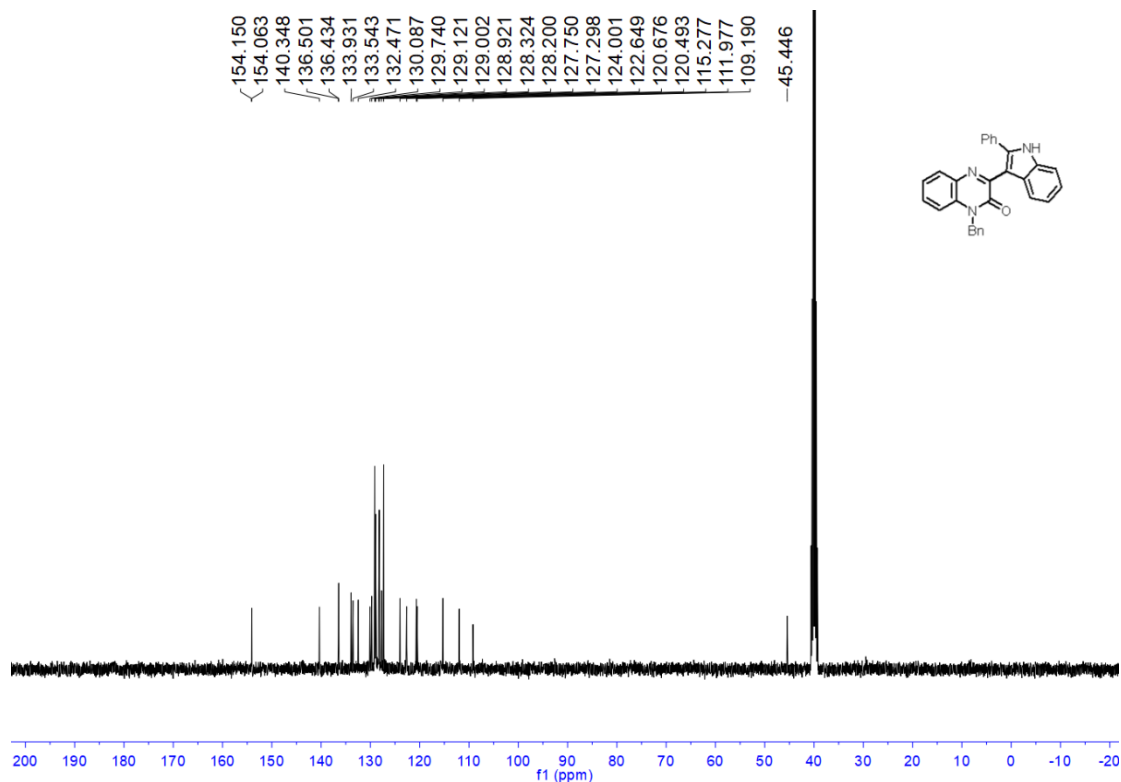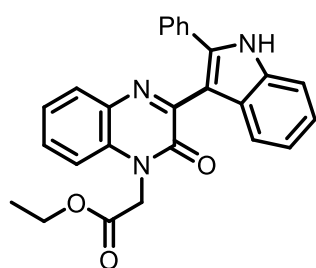

**Ethyl 2-(2-oxo-3-(2-phenyl-1H-indol-3-**

**yl)quinoxalin-1(2H)-yl)acetate (3na).** Yellow solid, 83.8 mg, yield 99%. m.p.: 208.7-209.2 °C. <sup>1</sup>H NMR (400 MHz, DMSO-*d*<sub>6</sub>) δ 11.92 (s, 1H), 7.84 (d, *J* = 7.7 Hz, 1H), 7.74 (d, *J* = 7.9 Hz, 1H), 7.62 – 7.55 (m, 1H), 7.55 – 7.47 (m, 4H), 7.44 – 7.29 (m, 4H), 7.21 (dd, *J*<sub>1</sub> = *J*<sub>2</sub> = 7.4 Hz, 1H), 7.11 (dd, *J*<sub>1</sub> = *J*<sub>2</sub> = 7.4 Hz, 1H), 5.04 (s, 2H), 4.14 (q, *J* = 7.0 Hz, 2H), 1.18 (t, *J* = 7.0 Hz, 3H). <sup>13</sup>C NMR (101 MHz, DMSO-*d*<sub>6</sub>) δ 168.0, 153.9, 153.7, 140.0, 136.5, 133.5, 133.3, 132.7, 130.3, 129.7, 128.9, 128.8, 128.4, 128.3, 124.2, 122.7, 120.6, 114.8, 112.0, 109.1, 61.8, 44.3, 14.5. HRMS (ESI, *m/z*) calcd for C<sub>26</sub>H<sub>21</sub>N<sub>3</sub>NaO<sub>3</sub><sup>+</sup> [M+Na]<sup>+</sup>: 446.1475, found 446.1475.

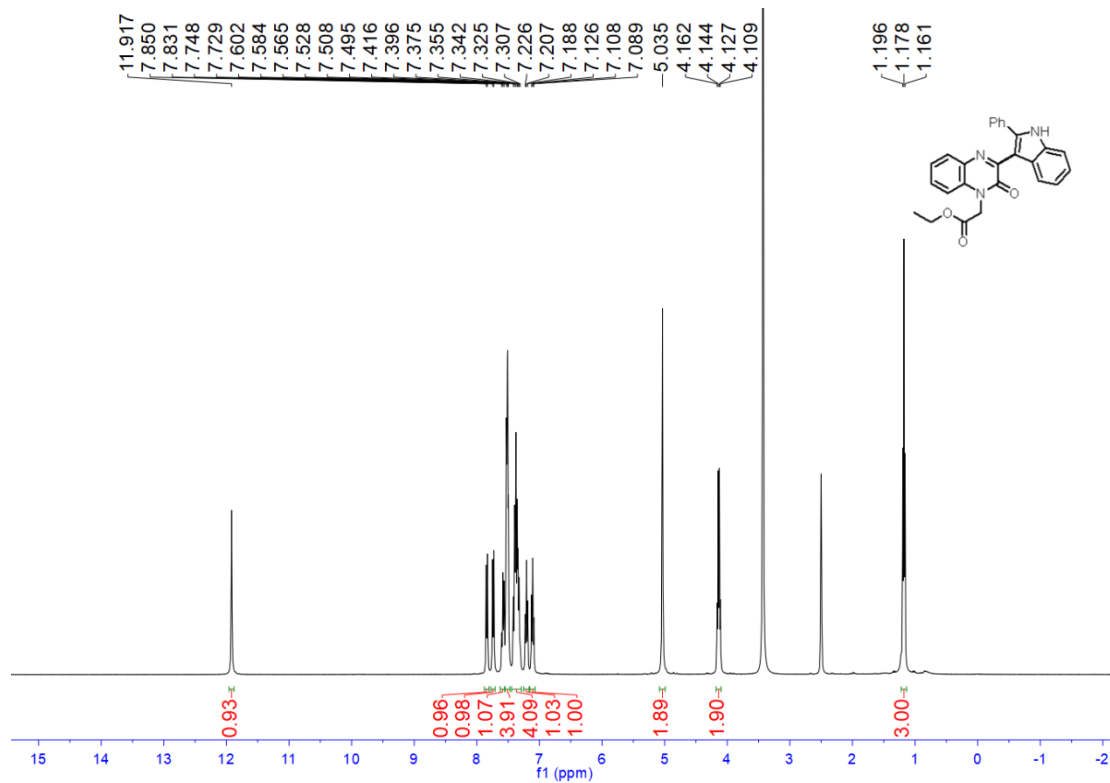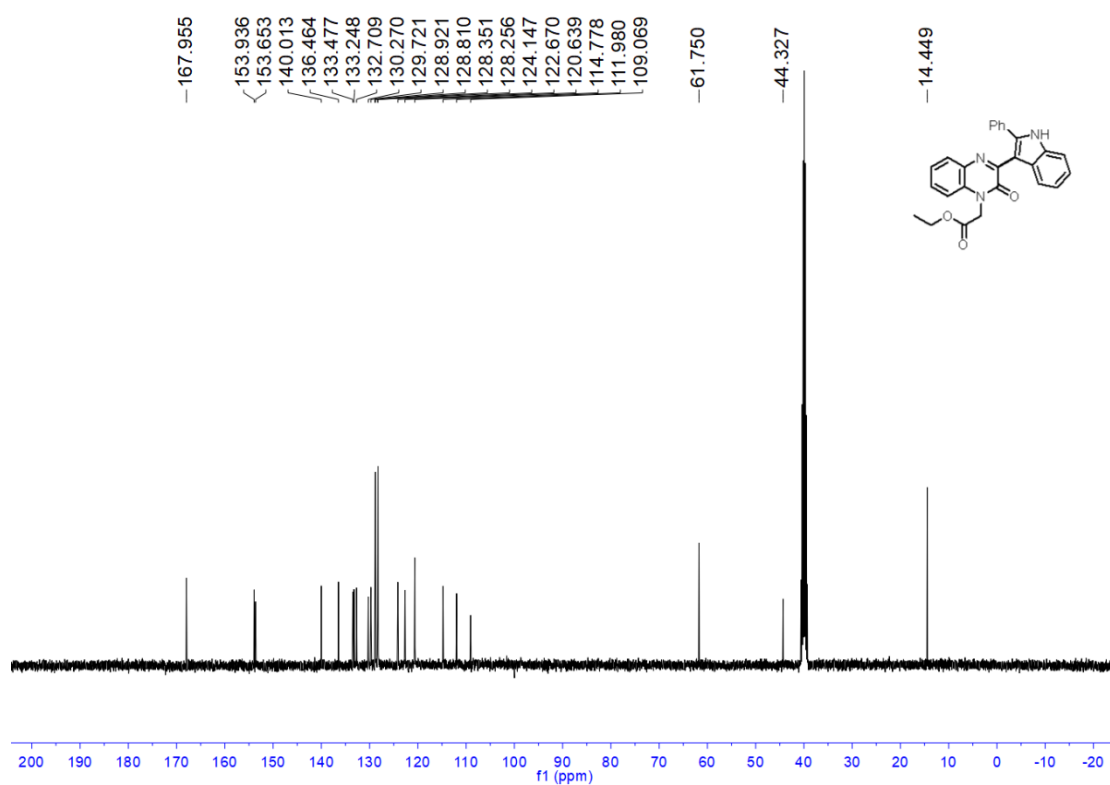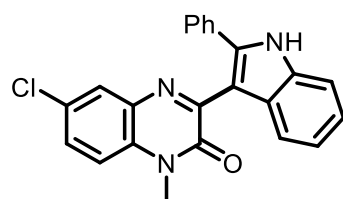

**6-chloro-1-methyl-3-(2-phenyl-1H-indol-3-**

**yl)quinoxalin-2(1H)-one (3oa).** Yellow solid, 71.8 mg, yield 93%. m.p.: 253.4-254.1 °C. <sup>1</sup>H NMR (400 MHz, DMSO-*d*<sub>6</sub>) δ 11.92 (s, 1H), 7.81 (d, *J* = 2.3 Hz, 1H), 7.75 (d, *J* = 8.0 Hz, 1H), 7.64 – 7.58 (m, 1H), 7.57 – 7.47 (m, 4H), 7.43 – 7.30 (m, 3H), 7.23 – 7.16 (m, 1H), 7.13 – 7.06 (m, 1H), 3.55 (s, 3H). <sup>13</sup>C NMR (101 MHz, DMSO-*d*<sub>6</sub>) δ 155.3, 153.9, 140.4, 136.4, 133.9, 133.6, 132.5, 129.5, 128.9, 128.8, 128.4, 128.1, 127.6, 122.6, 120.9, 120.6, 116.8, 111.9, 109.3, 30.0. HRMS (ESI, *m/z*) calcd for C<sub>23</sub>H<sub>16</sub>ClN<sub>3</sub>NaO<sup>+</sup> [M+Na]<sup>+</sup>: 408.0874, found 408.0875.

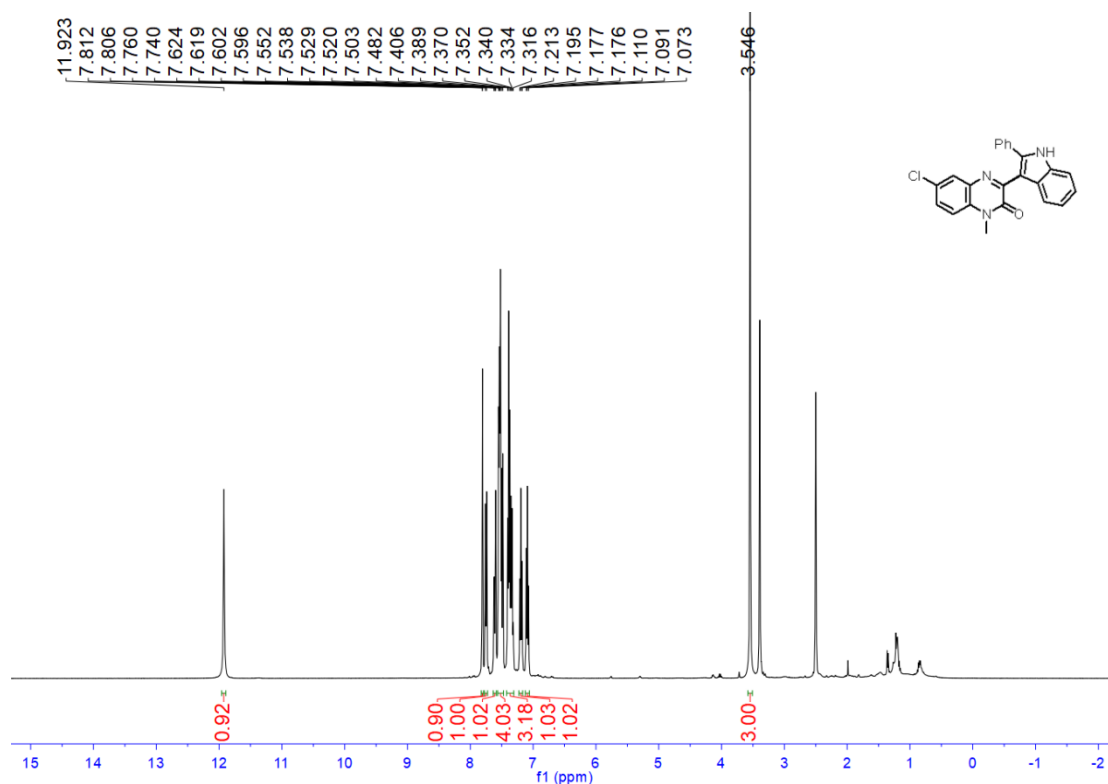

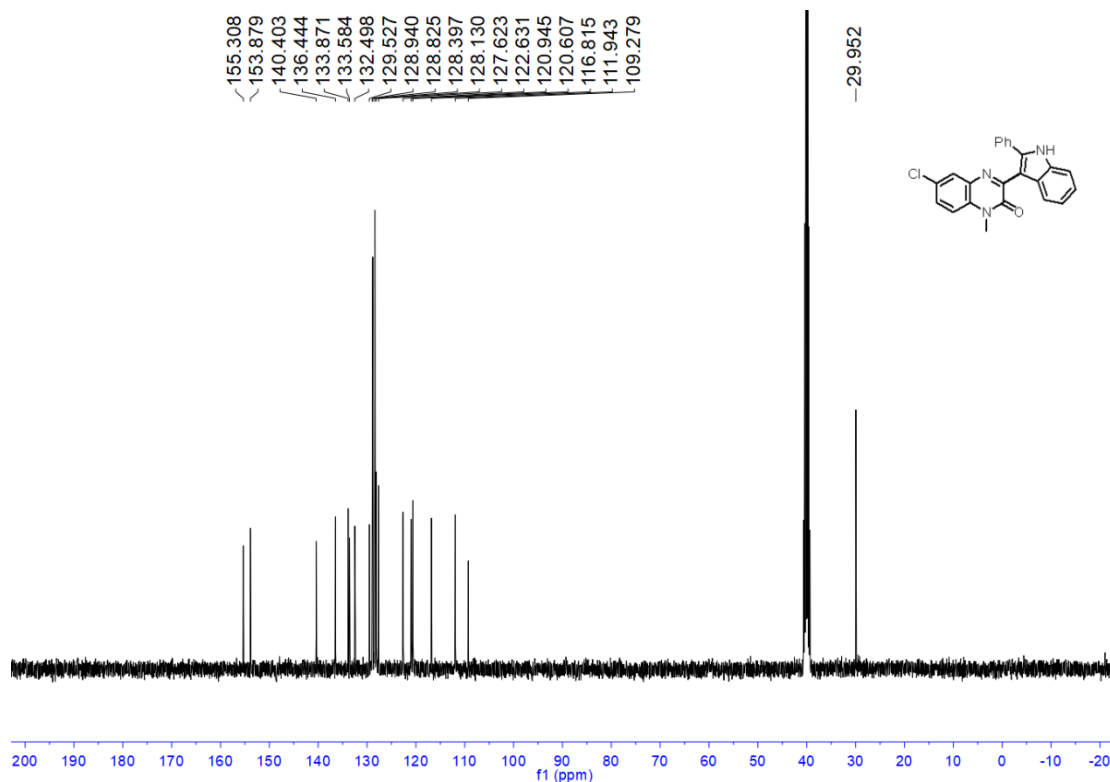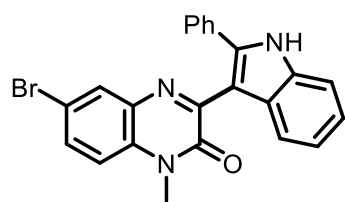

**6-bromo-1-methyl-3-(2-phenyl-1H-indol-3-yl)quinoxalin-2(1H)-one (3pa).** Yellow solid, 83.5 mg, yield 97%. m.p.: 271.2-273.7 °C.  $^1\text{H}$  NMR (400 MHz, DMSO- $d_6$ )  $\delta$  11.93 (s, 1H), 7.94 (d,  $J = 2.2$  Hz, 1H), 7.77 (d,  $J = 8.0$  Hz, 1H), 7.73 – 7.67 (m, 1H), 7.57 – 7.43 (m, 4H), 7.43 – 7.30 (m, 3H), 7.20 (dd,  $J_1 = J_2 = 7.2$  Hz, 1H), 7.10 (dd,  $J_1 = J_2 = 7.5$  Hz, 1H), 3.53 (s, 3H).  $^{13}\text{C}$  NMR (101 MHz, DMSO- $d_6$ )  $\delta$  155.2, 153.9, 140.4, 136.5, 134.2, 133.6, 132.9, 132.2, 131.1, 129.0, 128.8, 128.4, 122.6, 121.0, 120.6, 117.1, 115.3, 112.0, 109.3, 29.9. HRMS (ESI,  $m/z$ ) calcd for  $\text{C}_{23}\text{H}_{16}\text{BrN}_3\text{NaO}^+ [\text{M}+\text{Na}]^+$ : 452.0369, found 452.0372.

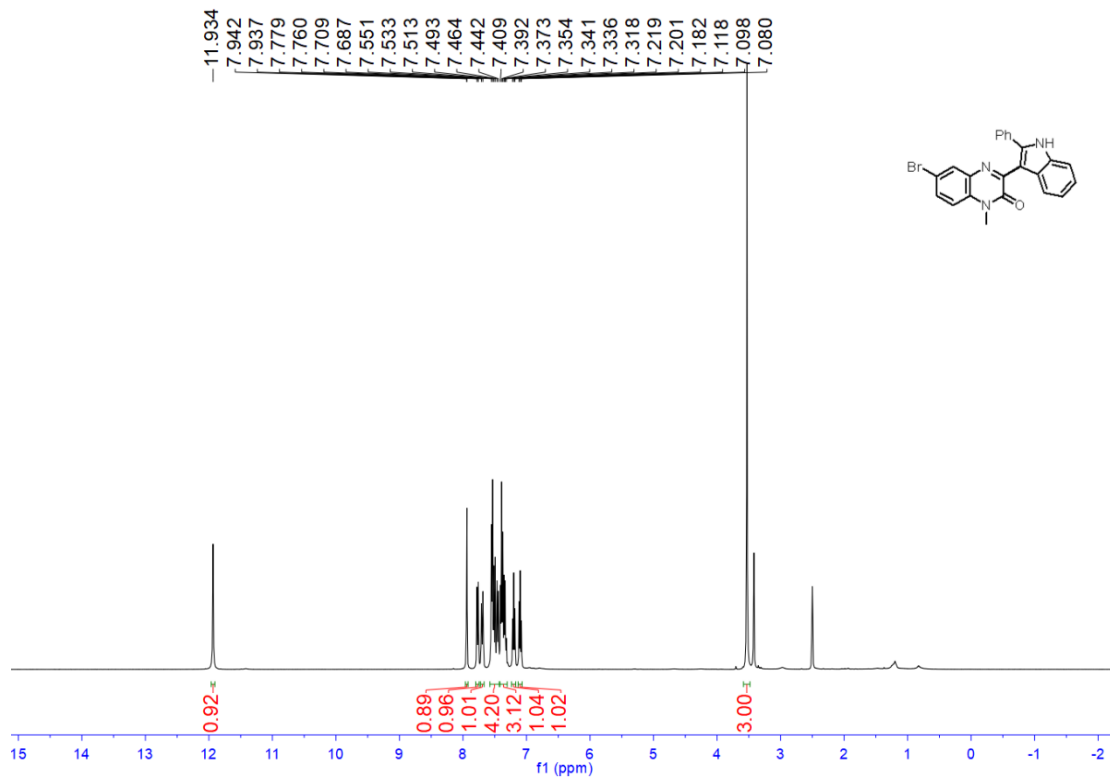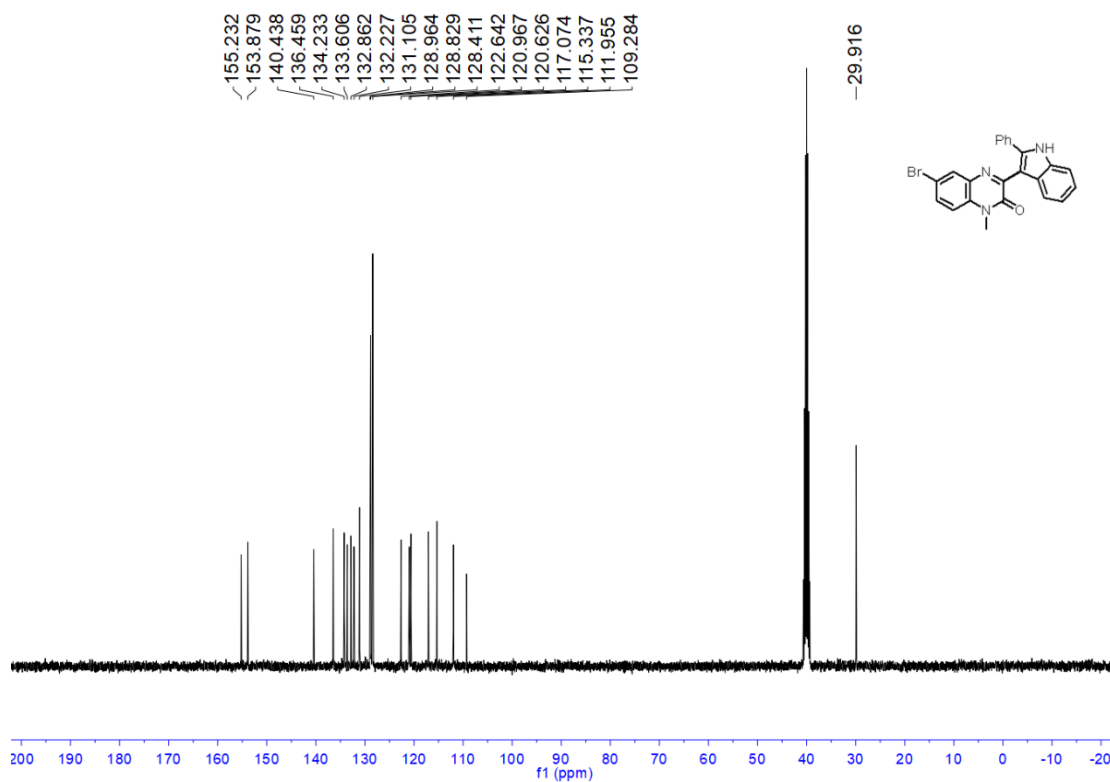

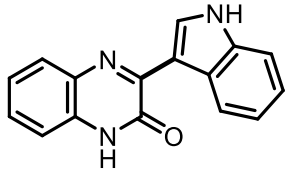

**3-(1*H*-indol-3-yl)quinoxalin-2(1*H*)-one (3qa).** A known

compound.<sup>5</sup> Orange solid, 30.1 mg, yield 58%. <sup>1</sup>H NMR (400 MHz, DMSO-*d*<sub>6</sub>) δ 12.42 (s, 1H), 11.79 (s, 1H), 8.95 (d, *J* = 2.7 Hz, 1H), 8.92 – 8.85 (m, 1H), 7.87 (d, *J* = 7.9 Hz, 1H), 7.56 – 7.48 (m, 1H), 7.46 – 7.39 (m, 1H), 7.36 – 7.28 (m, 2H), 7.27 – 7.21 (m, 2H). <sup>13</sup>C NMR (101 MHz, DMSO-*d*<sub>6</sub>) δ 154.9, 152.4, 136.7, 133.5, 133.1, 130.6, 128.4, 128.0, 126.6, 123.7, 123.4, 123.0, 121.4, 115.4, 112.3, 111.8.

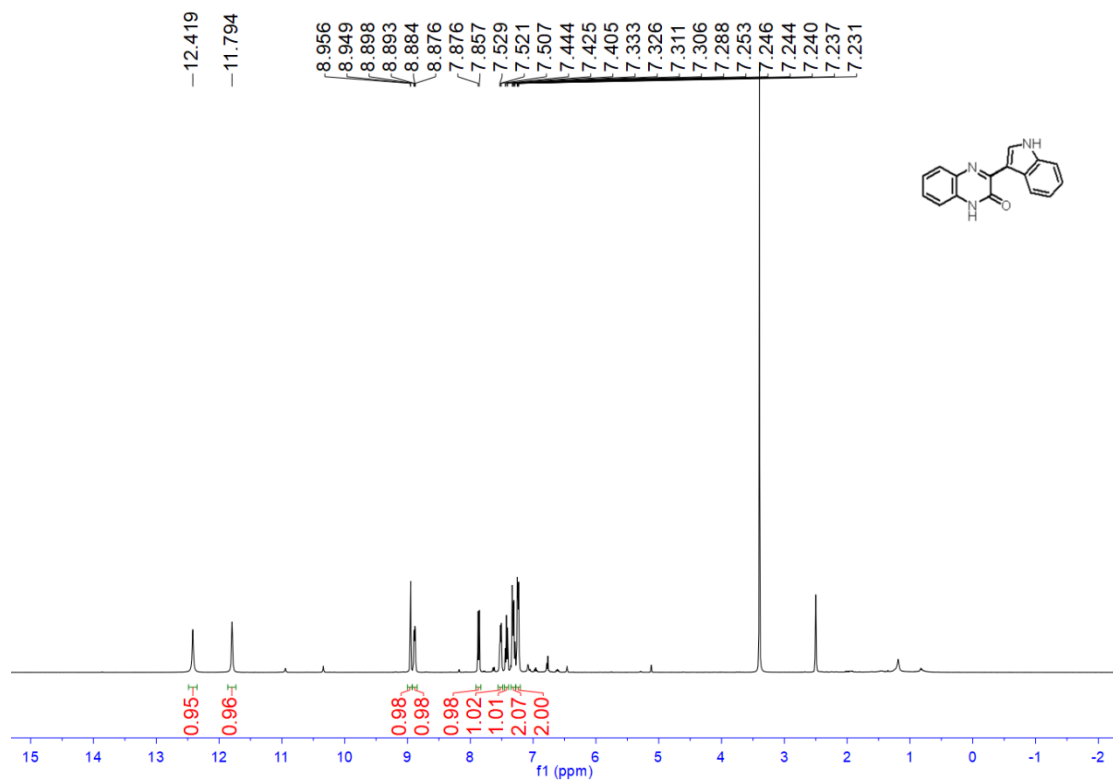

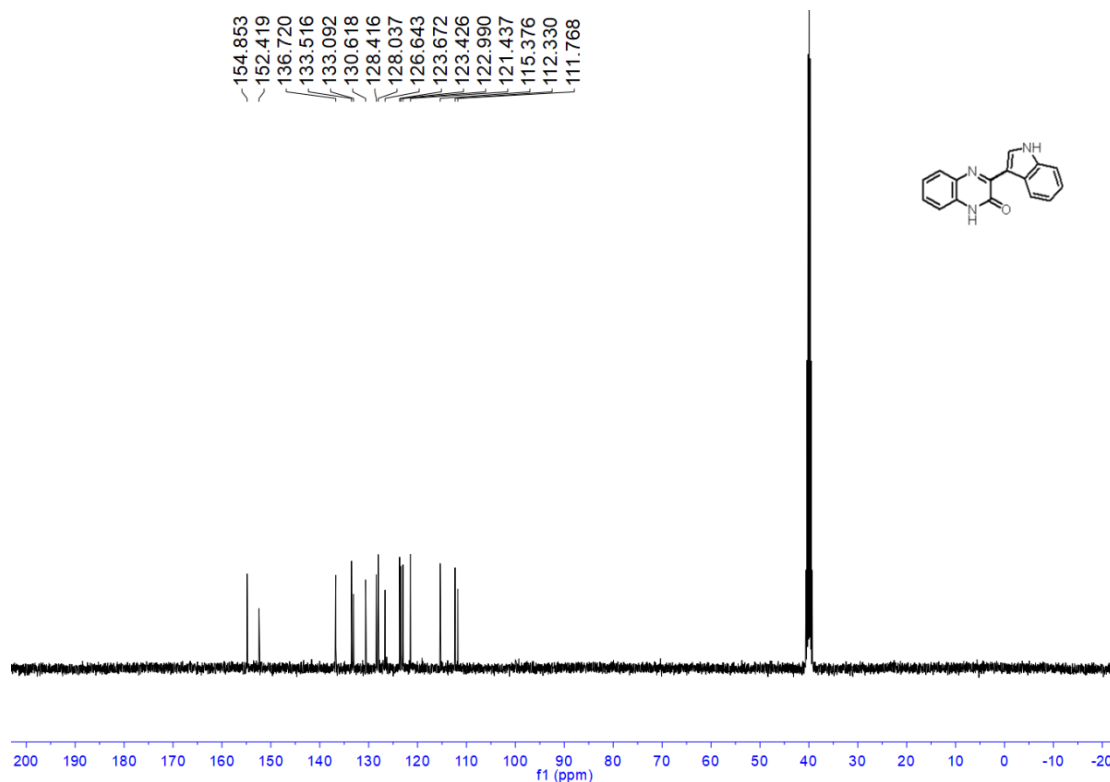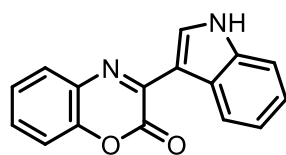

**3-(1*H*-indol-3-yl)-2*H*-benzo[*b*][1,4]oxazin-2-one (3ra).** A

known compound.<sup>5</sup> Yellow solid, 43.6 mg, yield 83%. <sup>1</sup>H NMR (400 MHz, DMSO-*d*<sub>6</sub>) δ 12.00 (s, 1H), 8.80 – 8.73 (m, 1H), 8.70 (d, *J* = 2.3 Hz, 1H), 7.88 – 7.82 (m, 1H), 7.58 – 7.51 (m, 1H), 7.50 – 7.44 (m, 1H), 7.44 – 7.37 (m, 2H), 7.31 – 7.23 (m, 2H). <sup>13</sup>C NMR (101 MHz, DMSO-*d*<sub>6</sub>) δ 152.5, 148.3, 145.3, 137.0, 134.2, 132.4, 129.1, 128.2, 126.4, 125.8, 123.5, 123.3, 122.0, 116.3, 112.6, 111.0.



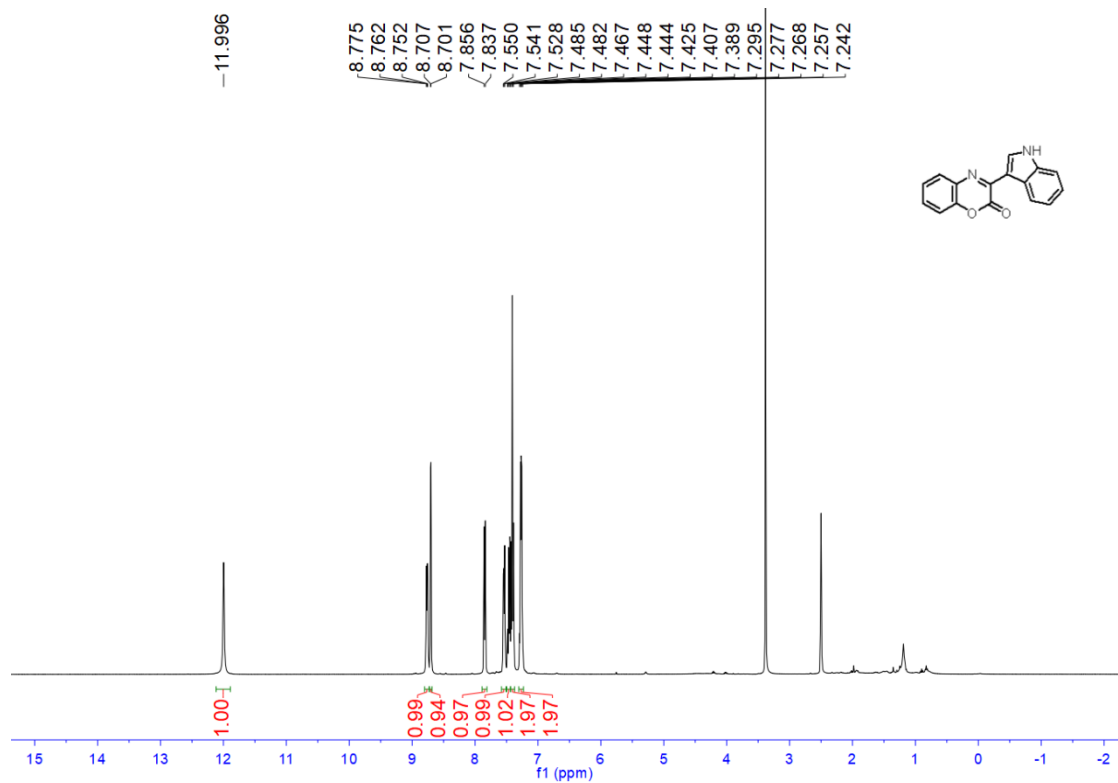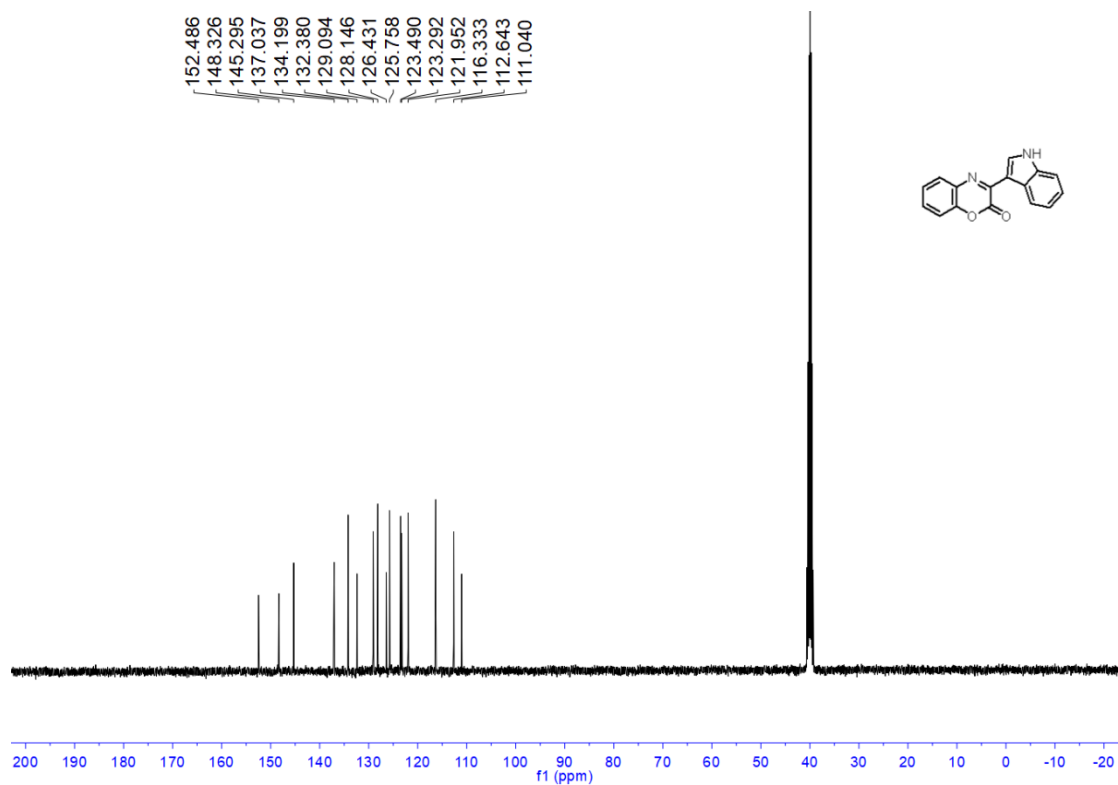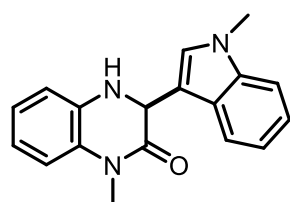

**1-methyl-3-(1-methyl-1H-indol-3-yl)-3,4-dihydroquinoxalin-2(1H)-one (3ab')**. White solid, 55.4 mg, yield 95%. m.p.: 208.3-

209.1 °C.  $^1\text{H}$  NMR (400 MHz,  $\text{DMSO-}d_6$ )  $\delta$  7.64 (d,  $J = 7.9$  Hz, 1H), 7.37 (d,  $J = 8.2$  Hz, 1H), 7.14 (t,  $J = 7.5$  Hz, 1H), 7.06 – 6.97 (m, 2H), 6.92 – 6.85 (m, 1H), 6.84 – 6.80 (m, 1H), 6.78 – 6.71 (m, 1H), 6.58 (s, 1H), 5.22 (s, 1H), 3.67 (s, 3H), 3.37 (s, 3H).  $^{13}\text{C}$  NMR (101 MHz,  $\text{DMSO-}d_6$ )  $\delta$  165.9, 137.1, 136.2, 128.6, 127.9, 126.5, 123.7, 121.8, 120.2, 119.3, 118.5, 115.0, 114.2, 113.0, 110.1, 53.7, 32.8, 29.1. HRMS (ESI,  $m/z$ ) calcd for  $\text{C}_{18}\text{H}_{17}\text{N}_3\text{ONa}^+$   $[\text{M}+\text{Na}]^+$ : 314.1264, found 314.1268.

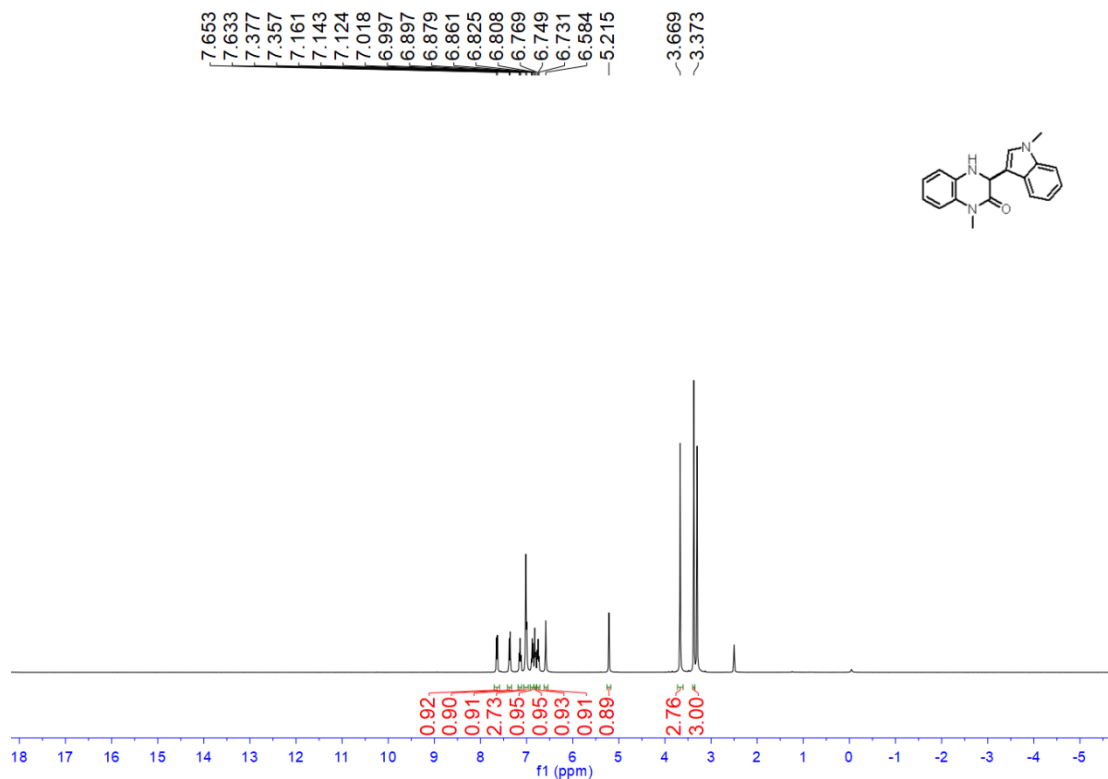

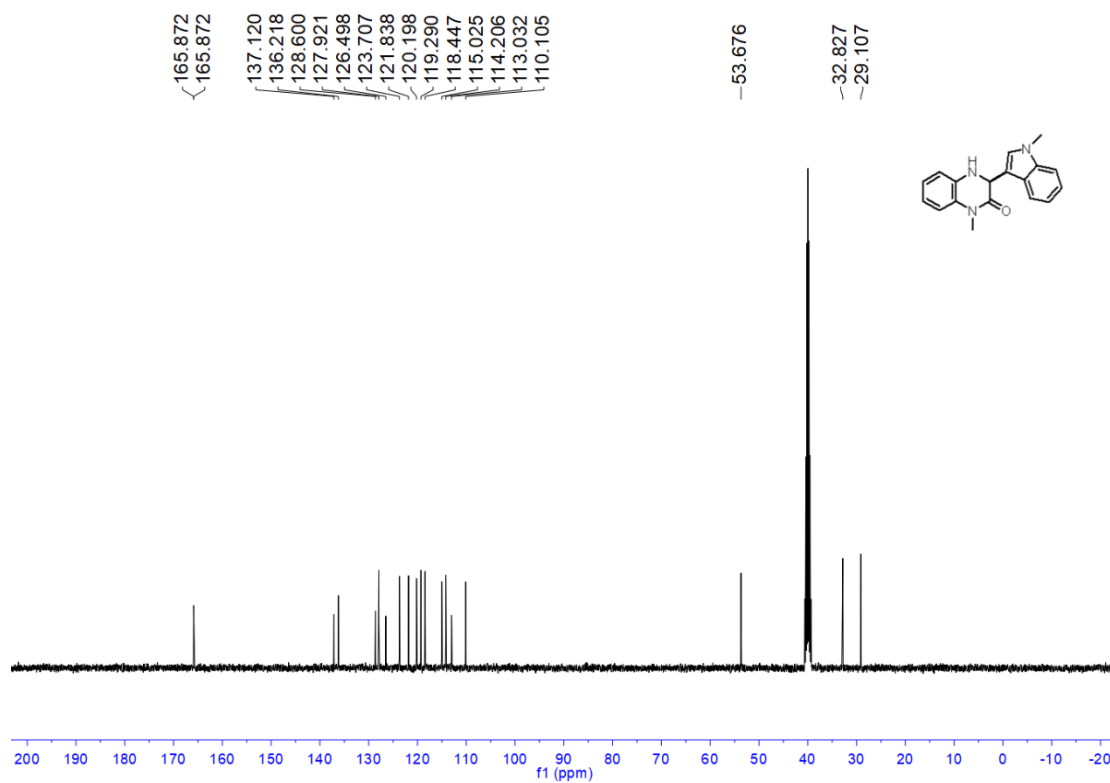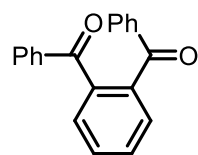

**Cyclohexa-3,5-diene-1,2-diylbis(phenylmethanone) (4b)** A known compound.<sup>2</sup> Yellow solid, 53.7 mg, yield 93%. <sup>1</sup>H NMR (400 MHz, CDCl<sub>3</sub>, TMS) δ 7.70 (d, *J* = 7.6 Hz, 4H), 7.61 (s, 4H), 7.67 – 7.54 (m, 2H), 7.41 – 7.33 (m, 4H). <sup>13</sup>C NMR (101 MHz, CDCl<sub>3</sub>, TMS) δ 196.6, 140.0, 137.2, 133.0, 130.4, 129.8, 129.7, 128.3.

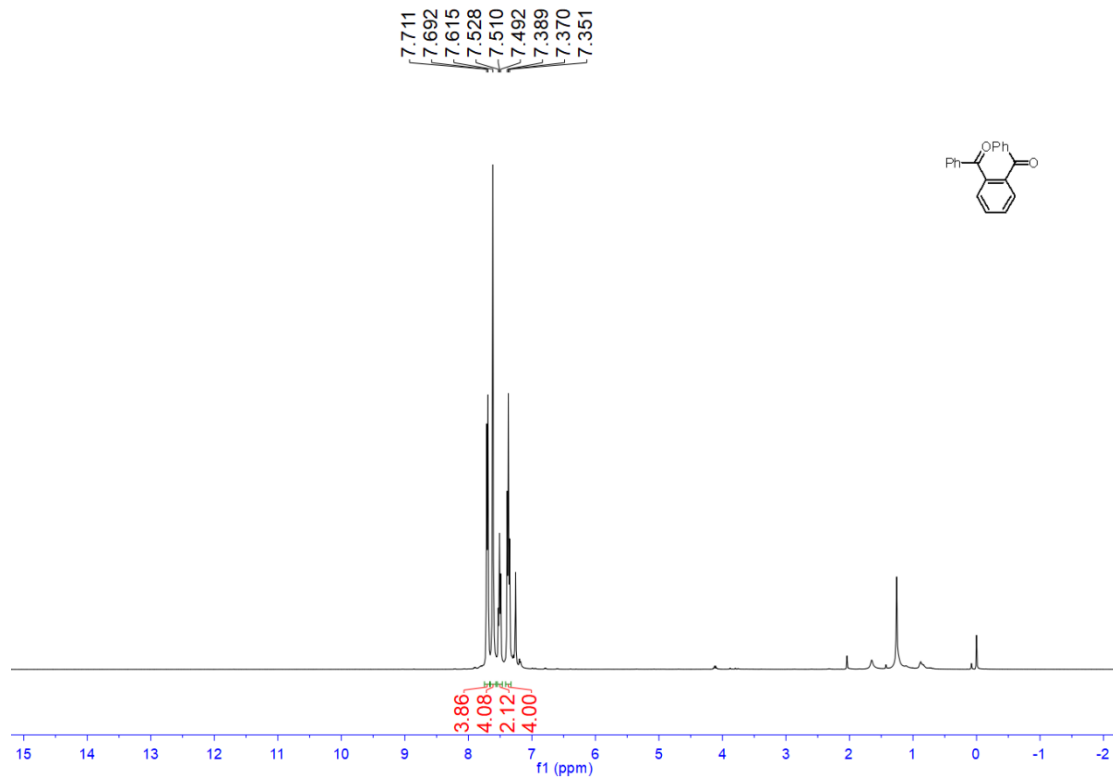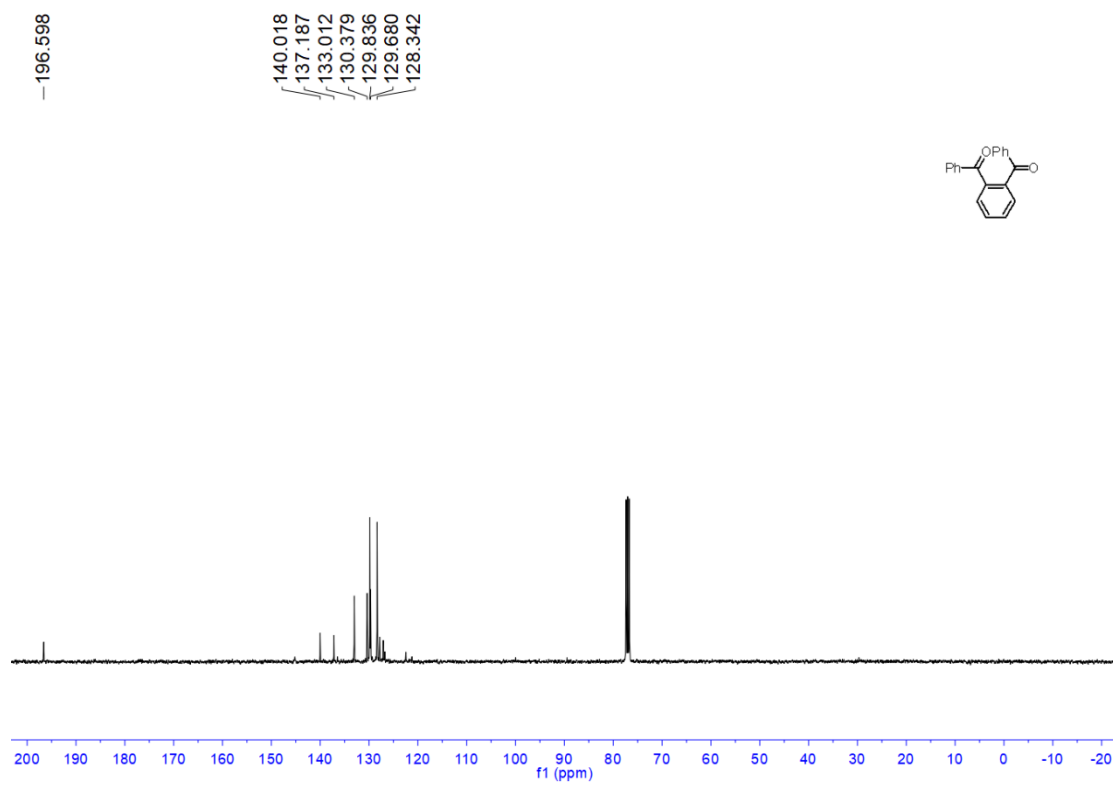

Supplement: d3ob00280b1.pdf [file d3ob00280b1.pdf]
